# Supplementary material
Source: Frontiers journal article supplement (https://www.frontiersin.org/articles/508003)
Supplement: Data_Sheet_2.PDF [file Data_Sheet_2.PDF]

| Autors                                                                                         | Title                                                                                              | Year | Meditation                                                                                                          | Meditation category (ADM,NDM,CDM) | Eyes open or closed?    | Number electrodes                                                           | EEG reference      | Number participants                                                                                  | Experience                                                                                                           | Design                                                                                                                                             | Method                                                                                                | Result                                                                                                                                                                                                                                                                                                                               |
|------------------------------------------------------------------------------------------------|----------------------------------------------------------------------------------------------------|------|---------------------------------------------------------------------------------------------------------------------|-----------------------------------|-------------------------|-----------------------------------------------------------------------------|--------------------|------------------------------------------------------------------------------------------------------|----------------------------------------------------------------------------------------------------------------------|----------------------------------------------------------------------------------------------------------------------------------------------------|-------------------------------------------------------------------------------------------------------|--------------------------------------------------------------------------------------------------------------------------------------------------------------------------------------------------------------------------------------------------------------------------------------------------------------------------------------|
| Anand, B., Chhina, G., and Singh, B                                                            | Some aspects of electroencephalographic studies in Yogis                                           | 1961 | Raj Yoga                                                                                                            | NDM<br>One practitioner CDM       | NA (probably open)      | NA                                                                          | Both ear lobes     | 4                                                                                                    | NA                                                                                                                   | Baseline vs meditation<br>2 Yogis meditated with hand in cold water and were compared to baseline                                                  | Visual inspection                                                                                     | Resting showed persistent alpha activity with increased amplitude modulation during meditation.<br><br>Alpha activity persisted with hands in the water.                                                                                                                                                                             |
| Kasamatsu A, Hirai T                                                                           | Electroencephalographic Study on the Zen Meditation (Zazen)                                        | 1966 | Zen (Zazen)                                                                                                         | CDM-FA                            | Eyes open               | 4                                                                           | NA                 | 48 (Zen) + 18 (Control)                                                                              | 20: 1-5 years<br>12: 5-20 years<br>16: over 16 years                                                                 | Before, during and after meditation                                                                                                                | Visual inspection                                                                                     | Appearance of alpha waves without regard to opened eyes; increase amplitude and decrease frequency with the progress of meditation.<br><br>Rhythmical theta train sometimes appear in the later stage of the meditation.<br><br>Findings correlated with experience in meditation                                                    |
| Wallace RK                                                                                     | Physiological effects of transcendental meditation                                                 | 1970 | TM                                                                                                                  | NDM                               | Eyes closed/ Eyes open  | 6                                                                           | Ear                | 15                                                                                                   | 6 month-3 years                                                                                                      | Pre - Meditation - Post<br>There were eyes open epochs before and after baselines                                                                  | Multimodal<br>Spectral                                                                                | Alpha: Increase in amplitude and uniformity. In 4 subjects alpha got slower and sometimes become theta for some time.<br><br>Rare theta trains<br><br>No habituation in Alpha blocking                                                                                                                                               |
| Wallace RK, Benson H, Wilson AF                                                                | A wakeful hypometabolic physiologic state                                                          | 1971 | TM                                                                                                                  | NDM                               | Eyes open or closed     | 6                                                                           | A2                 | 36 (28 males)                                                                                        | 0.25-108 months (mean 29.4)                                                                                          | Before, during and after meditation                                                                                                                | Multimodal<br>Spectral                                                                                | Increased amplitude in alpha waves - Central and frontal regions<br>occasional theta wave activity                                                                                                                                                                                                                                   |
| Banquet JP                                                                                     | Spectral analysis of the EEG in meditation                                                         | 1973 | TM                                                                                                                  | NDM                               | Eyes closed / eyes open | 7                                                                           | Linked ears        | 12 Meditators (9 males) and 12 control (3 control became meditation group after learning meditation) | 9 mo - 5 ya                                                                                                          | Baselines eyes open/closed-> Meditation -> Getting out of meditation/relaxation -> Eyes closed (focus on image or though)-> Baseline Eyes open     | Spectral (FFT)                                                                                        | Alpha increase in amplitude and gets slower. Usually spread from occipital to parietal<br><br>Theta burts. Start frontal and spread posterior<br><br>Beta appeared in 4 participants and was related with deeper states of meditation (trancendence).<br>Starts frontal and spread posterior<br><br>No habituation in Alpha blocking |
| Williams P, West M                                                                             | EEG responses to photic stimulation in persons experienced at meditation                           | 1975 | TM                                                                                                                  | NDM                               | Eyes closed             | 4                                                                           | bipolar recordings | 10 control (all males)<br>9 meditators (all males)                                                   | 10-72 months (average 31 months)                                                                                     | Photic stimulation in resting state eyes closed                                                                                                    | NA (maybe visual inspection)                                                                          | Smaller alpha blocking habituation in meditators than in control group                                                                                                                                                                                                                                                               |
| Tebecis, A. K.                                                                                 | A controlled study of the eeg during transcendental meditation: Comparison with hypnosis           | 1975 | TM                                                                                                                  | NDM                               | Eyes closed/Eyes open   | 2                                                                           | NA                 | Meditators: 14 (12 males)<br>Controls: 14 (8 males)                                                  | "at least some months".<br>Mean 19.8 months                                                                          | Meditation vs Hypnosis<br>they also acquired baseline with eyes open and closed                                                                    | Spectral                                                                                              | Higher mean theta density, during both meditation and non-meditation. Nevertheless, the hypnosis group presented more theta than the meditation group.                                                                                                                                                                               |
| Pagano RR, Rose RM, Stivers RM, Warrenburg S                                                   | Sleep during transcendental meditation                                                             | 1976 | TM                                                                                                                  | NDM                               | Eyes closed             | 3 (occipital, central and frontal)                                          | M1                 | 5                                                                                                    | at least 2.5 years                                                                                                   | Meditation vs Naps                                                                                                                                 | NA (maybe visual inspection)                                                                          | On average 19% of time in Sleep stage 1 and 17%, 23% in stage 3 and 27% in stages 3 and 4                                                                                                                                                                                                                                            |
| Fenwick PBC, Donaldson S, Gillis PL, Bushman J, Fenton PGW, Perry I, Tilsley C, Serafinowicz H | Metabolic and EEG changes during transcendental meditation: An explanation.                        | 1977 | TM                                                                                                                  | NDM                               | Eyes closed             | 6                                                                           | NA                 | 11 Meditators<br>7 Controls (predominantly non-meditators)- Classic music<br>8 Controls-Fasting      | "completed a course of instruction in TM"                                                                            | Meditators: before, during and after meditation<br>Controls: fasting and listening classic music                                                   | Multimodal (oxygen consumption)<br>Visual inspection                                                  | No EEG findings- they were all related to drowsiness                                                                                                                                                                                                                                                                                 |
| Elson BD, Hauri P, Cunis D                                                                     | Physiological changes in yoga meditation.                                                          | 1977 | Ananda Marga                                                                                                        | NDM                               | Eyes Closed/ Eyes open  | 1                                                                           | Ear                | 10 meditators and a professor with 54 months of practice; and 11 controls                            | (9-31 months of practice) and professor with 54 months                                                               | baselines with eyes closed and open-> Meditation -> baselines with eyes closed and open                                                            | Visual Criteria (technician experienced in using standardized sleep stage criteria)<br><br>Multimodal | Meditators had mor non-descending alpha-theta than controls and remained at a relative constant level                                                                                                                                                                                                                                |
| Hebert R, Lehmann D                                                                            | Theta bursts: an EEG pattern in normal subjects practising the transcendental meditation technique | 1977 | TM                                                                                                                  | NDM                               | Eyes Closed             | at least 10 scalp location (10/20 system) primarily in referential montages | NA                 | 78 (60 males)                                                                                        | 24-140 - mean 56.1 months<br>54 control subjects (35 males)                                                          | 5-10 min EO before and after a period of about 25 min of meditation                                                                                | Visual Observation<br>Spectral (Fourier)<br><br>Multimodal                                            | From meditation records 286 criterionmeeting theta bursts were seen in 21 of the 78 subjects.                                                                                                                                                                                                                                        |
| Akers TK, Tucker DM, Roth RS, Vidloff JS                                                       | Personality correlates of EEG change during meditation                                             | 1977 | Christian Meditation (listened to a tape recording of their regular instructor as he presented a topic of devotion) | CDM-FA                            | Eyes Closed             | 2 (O1 and O2)                                                               | NA                 | 15 (all males)                                                                                       | NA                                                                                                                   | mental arithmetic, taped devotion, meditation in silence                                                                                           | NA (maybe visual inspection)                                                                          | As many subjects decreased as increased their alpha production during meditation.                                                                                                                                                                                                                                                    |
| Morse DR, Martin JS, Furst ML, Dubin LL                                                        | A physiological and subjective evaluation of meditation, hypnosis, and relaxation                  | 1977 | TM                                                                                                                  | NDM                               | Eyes Closed             | 4 (right frontal, parietal, temporal and occipital)                         | Occipital region   | Meditation 12<br>Hypnosys 12<br>Meditation and Hyp 12<br>Naive in both 12                            | Meditators (2 mo-5ye; mean 1.3ye)<br>Hypnosys (3mo-10ye; mean 1ye)<br>Meditators and Hypnosys (6mo-8ye; mean 3.8 ye) | 6 conditions:<br>Alert<br>Relaxation<br>HeteroHypnosysRelaxation<br>HeteroHypnosysTask<br>AutoHypnosysRelaxation<br>Meditation (TM or simple word) | Multimodal<br>Visual inspection                                                                       | Significant differences between task-hypnosis and relaxation-hypnosis. No significant differences were found between meditation and simple word meditation.                                                                                                                                                                          |

| Autors                                                      | Title                                                                                                                                             | Year | Meditation        | Meditation category (ADM,NDM,CDM) | Eyes open or closed?   | Number electrodes                                        | EEG reference                                                                                                                               | Number participants                                                                                          | Experience                                                                       | Design                                                                                                                                            | Method                                              | Result                                                                                                                                                                                                                                                                                                                                                                                                                                         |
|-------------------------------------------------------------|---------------------------------------------------------------------------------------------------------------------------------------------------|------|-------------------|-----------------------------------|------------------------|----------------------------------------------------------|---------------------------------------------------------------------------------------------------------------------------------------------|--------------------------------------------------------------------------------------------------------------|----------------------------------------------------------------------------------|---------------------------------------------------------------------------------------------------------------------------------------------------|-----------------------------------------------------|------------------------------------------------------------------------------------------------------------------------------------------------------------------------------------------------------------------------------------------------------------------------------------------------------------------------------------------------------------------------------------------------------------------------------------------------|
| Levine, P. H., Hebert, J. R., Haynes, C. T., and Strobel, U | Eeg coherence during the transcendental meditation technique                                                                                      | 1977 | TM                | NDM                               | Eyes Closed/ Eyes open | 10                                                       | No uniform convention on reference electrode placement was in force, with homolateral, contralateral, and linked ears being variously used. | 7 Novice (5 males)<br>21 Experienced (10 males)                                                              | 0-15 years                                                                       | Eyes-open precontrol, eyes-closed precontrol, Meditation, eyes-closed postcontrol, eyes-open postcontrol                                          | Coherence                                           | Coherence between F3/F4, C3/C4, C3/F3 e C4/F4.<br><br>Increase in the height and/or incidence of coherence peaks in the alpha band with onset of meditation but without a marked decrease at the end of that period.<br><br>Spreading of coherence peaks to other - generally lower - frequencies during meditation.<br><br>Abrupt onset of strong coherence with the start of the meditation and abrupt decrease at the end of the technique. |
| Corby JC, Roth WT, Zarcone VP Jr, Kopell BS                 | Psychophysiological correlates of the practice of Tantric Yoga meditation                                                                         | 1978 | Ananda Marga      | NDM                               | Eyes Closed            | 1 (Cz)                                                   | Joined mastoids                                                                                                                             | 3 groups of 10 naive subjects                                                                                | Trainees - average of 2.1 years<br>Experts - average of 4.4 years                | 3 conditions: 1) baseline;<br>2) withdraw condition - preparation;<br>3) Meditation                                                               | Multimodal<br><br>Spectral<br><br>EP (Auditory)     | Meditators increase theta with meditation more than controls<br><br>Alpha power tended to increase as subjects meditated (n.s.)<br><br>EP: Compared N1, P2 and P3.<br>P2, P3 and N1 amplitudes progressively decreased for infrequent tones as subjects entered meditation, but P2 and P3 increased for frequent ones                                                                                                                          |
| Barwood TJ, Empson JA, Lister SG, Tilley AJ                 | Auditory evoked potentials and transcendental meditation                                                                                          | 1978 | TM                | NDM                               | Eyes Open              | 1                                                        | Left mastoid                                                                                                                                | 8                                                                                                            | 18 months - 6 years                                                              | 3 Blocks of 50 stimuli before, during and after meditation<br><br>1 block at sleep onset                                                          | EP (auditory)                                       | Analysed: amplitude and latency of the N1, P1 and N2 peaks.<br>No consistent changes were noted between baseline and meditating AEPs and from meditation and light sleep                                                                                                                                                                                                                                                                       |
| Warrenburg S, Pagano RR, Woods M, Hlastala M                | A comparison of somatic relaxation and EEG activity in classical progressive relaxation and transcendental meditation                             | 1980 | TM                | NDM                               | Eyes Closed            | 2 (C4, O2)                                               | A1                                                                                                                                          | Experienced meditators: 9 (3 males)<br>Experienced Relaxation: 9 (3 males)<br>Novice Relaxation: 9 (3 males) | Experienced meditators: mean 3.4 years<br>Experienced Relaxation: mean 6.4 years | Relaxation Group (experienced) X Meditation X novice relaxation<br><br>They had a baseline with eyes closed and red a book                        | Multimodal<br><br>Visual inspection                 | Subjects were awake even with eyes closed<br>Short duration, high amplitude theta bursts                                                                                                                                                                                                                                                                                                                                                       |
| McEvoy TM, Frumkin LR, Harkins SW                           | Effects of meditation on brainstem auditory evoked potentials                                                                                     | 1980 | TM                | NDM                               | NA                     | 1 (Cz)                                                   | Mastoid                                                                                                                                     | 5 (1 male)<br>5 controls                                                                                     | 6-9 years                                                                        | before and after meditation. Stimulus at different intensities                                                                                    | EP (auditory)                                       | Compared: waves I, II, III, and V<br><br>No pre-postmeditation differences at low stimulus intensities.<br>Latency of the inferior collicular wave (wave V) increased following meditation at moderate intensities<br>Latency slightly decreased at higher stimulus intensities.                                                                                                                                                               |
| Banquet, J. and Lesevre, N                                  | Event-related potentials in altered states of consciousness                                                                                       | 1980 | Yoga meditation   | NA                                | NA                     | 9                                                        | Linked ears                                                                                                                                 | 10 experimental (meditators)<br>10 controls                                                                  | NA                                                                               | visual choice reaction time task.<br><br>choice reaction time task pre and post meditation or resting states (for control group)<br>Go/No-Go task | ERP(Visual)                                         | P200 was significantly higher in pre and post for the meditators group compared to controls<br><br>N120 was higher post meditation for the meditation group compared to controls<br><br>The average response time for the meditators group occur before the P300 peak and has a smaller latency when compared to controls                                                                                                                      |
| Dillbeck MC, Bronson EC                                     | Short-term longitudinal effects of the transcendental meditation technique on EEG power and coherence                                             | 1981 | TM                | NDM                               | Eyes closed            | 4 (F3, F4, O1, O2)                                       | Linked mastoids                                                                                                                             | 15                                                                                                           | 2-week retreat (2 practices a day)                                               | Before and after retreat                                                                                                                          | Spectral (FFT)<br>Coherence                         | Increased coherence in frontal electrodes in alpha                                                                                                                                                                                                                                                                                                                                                                                             |
| Dillbeck, M. C., Orme-Johnson, D.W., and Wallace, R. K      | Frontal eeg coherence, h-reflex recovery, concept learning, and the tm-sidhi program                                                              | 1981 | TM                | NDM                               | Eyes closed            | 11 (F3, F4, C3, C4, P3, P4, O1, O2, T3, T4, Cz, and EOG) | Linked ears                                                                                                                                 | 12 - Experimental<br>13 - Controls                                                                           | Experimental group undertook a three month TM-Sidhi program                      | Subjects did a Concept-learning task before and after three months                                                                                | Spectral (FFT)<br>Coherence<br>H-Reflex             | Found a relationship in frontal EEG coherence and H-reflex recovery that improved after TM                                                                                                                                                                                                                                                                                                                                                     |
| Stigsby B, Rodenberg JC, Moth HB                            | Electroencephalographic findings during mantra meditation (transcendental meditation). A controlled, quantitative study of experienced meditators | 1981 | TM                | NDM                               | Eyes Closed            | 10 (mas em montagens bipolares, needles)                 | NA                                                                                                                                          | 13 (8 males)                                                                                                 | at least 2 years (up to 8 years)                                                 | baseline before and after, meditation, drowsiness, sleep onset and sleep                                                                          | Multimodal<br><br>Visual Inspection<br><br>Spectral | The EEG frequency spectra constituted a continuum with increasing theta and delta activity and decreasing alpha activity as the participants tended to fall asleep.<br><br>No consistent EEG pattern associated with a successful or unsuccessful meditation                                                                                                                                                                                   |
| Becker DE, Shapiro D                                        | Physiological responses to clicks during Zen, Yoga, and TM meditation                                                                             | 1981 | Zen<br>Yoga<br>TM | NDM                               | Eyes closed            | 2 (Cz, Oz)                                               | Right ear (A2)                                                                                                                              | 30 meditators (10 TM, 10 Yoga, 10 Zen)<br>10 controls (attend)<br>10 controls (resting)                      | Zen: 3 to 20 years<br>Yoga: 3 to 8.5 years<br>TM: 3.5 to 10.5 years              | meditation vs attend vs resting                                                                                                                   | EP (auditory)<br>Spectral<br>Multimodal             | Alpha blocking and habituation in all groups<br>No difference for P200 and P300<br>Enhanced N100 amplitude in Yoga and TM                                                                                                                                                                                                                                                                                                                      |
| Farrow JT, Hebert JR                                        | Breath suspension during the transcendental meditation technique                                                                                  | 1982 | TM                | NDM                               | Eyes open/ Eyes closed | 9 (F3, F4, C3, C4, T3, Pz, O1, O2, Oz)                   | Linked ears                                                                                                                                 | 1                                                                                                            | 16 years                                                                         | Eyes open; eyes closed but not practicing TM; TM: Eyes closed but not practicing TM; Eyes open.                                                   | Spectral (FFT)<br>Coherence<br>Multimodal           | Bursts of theta, sometimes accompanied by bursts in other frequencies<br>Theta power peaked after breath suspension<br>Alpha power increases<br><br>EEG coherence higher in theta, alpha and beta before and during pure consciousness, with a sharp decrease afterward                                                                                                                                                                        |

| Autors                                           | Title                                                                                                                                                           | Year | Meditation                 | Meditation category (ADM,NDM,CDM) | Eyes open or closed?    | Number electrodes                                                                              | EEG reference        | Number participants                                                                                  | Experience                                                                                                                                                                                  | Design                                                                                                                                                                                                            | Method                                    | Result                                                                                                                                                                                                                                                                                                                                      |
|--------------------------------------------------|-----------------------------------------------------------------------------------------------------------------------------------------------------------------|------|----------------------------|-----------------------------------|-------------------------|------------------------------------------------------------------------------------------------|----------------------|------------------------------------------------------------------------------------------------------|---------------------------------------------------------------------------------------------------------------------------------------------------------------------------------------------|-------------------------------------------------------------------------------------------------------------------------------------------------------------------------------------------------------------------|-------------------------------------------|---------------------------------------------------------------------------------------------------------------------------------------------------------------------------------------------------------------------------------------------------------------------------------------------------------------------------------------------|
| Badawi K, Wallace RK, Orme-Johnson D, Rouzere AM | Electrophysiologic characteristics of respiratory suspension periods occurring during the practice of the Transcendental Meditation Program                     | 1984 | TM                         | NDM                               | Eyes closed             | For some: 9 (F3, F4, C3, Cz, C4, T3, T4, O1, O2)<br>For others: 6 (F3, F4, C3, C4, O3, and O4) | Linked ears          | 54 meditators<br>30 meditators (active control- breath suppression)<br>31 non-meditators             | 16-144 months<br>1-113 months (active control)                                                                                                                                              | meditation vs rest                                                                                                                                                                                                | Spectral (FFT)<br>Coherence<br>Multimodal | Increased alpha power and theta spindles<br><br>EEG coherence increase during breath suspension (all bands) in meditation, not present in control                                                                                                                                                                                           |
| Heide FJ                                         | Psychophysiological responsiveness to auditory stimulation during transcendental meditation                                                                     | 1986 | TM                         | NDM                               | Eyes closed             | 1                                                                                              | NA                   | 17 meditators<br>17 controls                                                                         | 8-66 months                                                                                                                                                                                 | Meditation (meditators) vs rest (controls)                                                                                                                                                                        | Multimodal<br>Alpha blocking              | No differences between groups                                                                                                                                                                                                                                                                                                               |
| Dillbeck MC, Vesely SA                           | Participation in the transcendental meditation program and frontal EEG coherence during concept learning                                                        | 1986 | TM                         | NDM                               | Eyes closed             | 7 (F3, F4, C3, C4, O1, O2, EOG)                                                                | Linked ears          | 16 meditators<br>16 controls                                                                         | 47.2 months                                                                                                                                                                                 | Meditation (meditators) vs rest (controls)                                                                                                                                                                        | Coherence                                 | Higher alpha and beta coherence in frontal electrodes                                                                                                                                                                                                                                                                                       |
| Severtsen B, Bruya MA                            | Effects of meditation and aerobic exercise on EEG patterns                                                                                                      | 1986 | "mantra meditation"        | CDM - FA                          | Eyes open/ Eyes closed  | NA                                                                                             | NA                   | 5 meditators<br>5 exercise                                                                           | Novice                                                                                                                                                                                      | Meditation vs Exercise group<br>All at recordings at rest                                                                                                                                                         | Spectral                                  | No differences between groups                                                                                                                                                                                                                                                                                                               |
| Gaylord, C., Orme-Johnson, D., and Travis, F     | The Effects of the Transcendental Meditation Technique and Progressive Muscle Relaxation on Eeg Coherence, Stress Reactivity, and Mental Health in Black Adults | 1989 | TM                         | NDM                               | Eyes closed             | 6                                                                                              | Linked ears          | Randomly assigned<br><br>Meditators: 25<br>Relaxation: 29<br>Control: 29                             | They took a 10 hours course over six days. They were encouraged to practice daily for 20 minutes and to meet a group once a week for 2.5 months.<br><br>They were posttested one year later | Resting with eyes open -> resting eyes closed -> practiced relaxation procedure and the control group was asked to relax as deeply as possible -> resting eyes closed second time-> resting eyes open second time | Multimodal<br>Coherence                   | No longitudinal changes in EEG                                                                                                                                                                                                                                                                                                              |
| Zhang W, Zheng R, Zhang B, Yu W, Shen X          | An observation on flash evoked cortical potentials and Qigong meditation                                                                                        | 1993 | Qigong-focusing on Dantian | CDM - FA                          | Eyes Open               | 1 (Oz)                                                                                         | Right ear (A2)       | 14 experienced<br>12 beginner experience<br>11 controls                                              | experienced: 0.5-5.5 years<br>beginners: 0.5-3 months                                                                                                                                       | Flashes before, during and after Qigong meditation                                                                                                                                                                | EP (visual)                               | VEP amplitudes increased during meditation in advanced practitioners                                                                                                                                                                                                                                                                        |
| Telles S, Nagarathna R, Nagendra HR, Desiraju T  | Alterations in auditory middle latency evoked potentials during meditation on a meaningful symbol-"Om"                                                          | 1994 | "Om" meditation            | CDM-FA                            | Eyes closed             | 1 (Cz)                                                                                         | Left ear (A1)        | 9 meditators (all males)<br>9 naive (all males)                                                      | more than 10 years of experience (12.4 SD 1.8 years)                                                                                                                                        | Sham meditation ("One"), Meditation ("Om"), baseline before and after                                                                                                                                             | EP (auditory)                             | Evaluated wave V, Na and Pa<br><br>Meditators: increase in the peak amplitude of Na wave during meditation<br>reduction in the Na wave peak amplitude during control sessions.<br><br>Naive: significant decrease in the Na wave peak amplitude during meditation sessions<br><br>No significant changes in short latency wave V or Pa wave |
| Travis F, Wallace RK                             | Autonomic patterns during respiratory suspensions: possible markers of Transcendental Consciousness                                                             | 1997 | TM                         | NDM                               | Eyes closed             | 19                                                                                             | NA                   | 78 (60 males)                                                                                        | 0.4-22.5 years (Mean 12.6)                                                                                                                                                                  | three phases of TM: inward strole, Transcendental Consciousness, outward stroke                                                                                                                                   | Multimodal<br>Spectral                    | Outward stroke not obtained for all participants<br><br>Difference between Transcendental Consciousness and inward stroke: decreased theta and increased alpha                                                                                                                                                                              |
| Lee MS, Bae BH, Ryu H, Sohn JH, Kim SY, Chung HT | Changes in alpha wave and state anxiety during ChunDoSunBup Qi-training in trainees with open eyes                                                              | 1997 | Qigong - ChunDoSun Bup Qi  | CDM-FA                            | Eyes open               | 6 (F3, F4, C3, C4, O1, O2)                                                                     | Earlobes (A1 and A2) | 13 (7 males)                                                                                         | 1-3 years                                                                                                                                                                                   | Analysis of distinct states of Qigong. (2 of them have movements)                                                                                                                                                 | Spectral (FFT)                            | Increased alpha in occipital region                                                                                                                                                                                                                                                                                                         |
| Anand, B., Chhina, G., and Singh, B              | Some aspects of electroencephalographic studies in Yogis                                                                                                        | 1961 | Raj Yoga                   | NDM<br>One practitioner CDM       | NA (probably open)      | NA                                                                                             | Both ear lobes       | 4                                                                                                    | NA                                                                                                                                                                                          | Baseline vs meditation<br>2 Yogis meditated with hand in cold water and were compared to baseline                                                                                                                 | Visual inspection                         | Resting showed persistent alpha activity with increased amplitude modulation during meditation.<br><br>Alpha activity persisted with hands in the water.                                                                                                                                                                                    |
| Kasamatsu A, Hirai T                             | Electroencephalographic Study on the Zen Meditation (Zazen)                                                                                                     | 1966 | Zen (Zazen)                | CDM-FA                            | Eyes open               | 4                                                                                              | NA                   | 48 (Zen) + 18 (Control)                                                                              | 20: 1-5 years<br>12: 5-20 years<br>16: over 16 years                                                                                                                                        | Before, during and after meditation                                                                                                                                                                               | Visual inspection                         | Appearance of alpha waves without regard to opened eyes: increase amplitude and decrease frequency with the progress of meditation.<br><br>Rhythmical theta train sometimes appear in the later stage of the meditation.                                                                                                                    |
| Wallace RK                                       | Physiological effects of transcendental meditation                                                                                                              | 1970 | TM                         | NDM                               | Eyes closed/ Eyes open  | 6                                                                                              | Ear                  | 15                                                                                                   | 6 month-3 years                                                                                                                                                                             | Pre - Meditation - Post<br>There were eyes open epochs before and after baselines                                                                                                                                 | Multimodal<br>Spectral                    | Findings correlated with experience in meditation<br>Alpha: Increase in amplitude and uniformity. In 4 subjects alpha got slower and sometimes become theta for some time.<br><br>Rare theta trains                                                                                                                                         |
| Wallace RK, Benson H, Wilson AF                  | A wakeful hypometabolic physiologic state                                                                                                                       | 1971 | TM                         | NDM                               | Eyes open or closed     | 6                                                                                              | A2                   | 36 (28 males)                                                                                        | 0.25-108 months (mean 29.4)                                                                                                                                                                 | Before, during and after meditation                                                                                                                                                                               | Multimodal<br>Spectral                    | No habituation in Alpha blocking<br><br>Increased amplitude in alpha waves - Central and frontal regions<br>occasional theta wave activity                                                                                                                                                                                                  |
| Banquet JP                                       | Spectral analysis of the EEG in meditation                                                                                                                      | 1973 | TM                         | NDM                               | Eyes closed / eyes open | 7                                                                                              | Linked ears          | 12 Meditators (9 males) and 12 control (3 control became meditation group after learning meditation) | 9 mo - 5 ya                                                                                                                                                                                 | Baselines eyes open/closed-> Meditation -> Getting out of meditation/relaxation -> Eyes closed (focus on image or though)-> Baseline Eyes open                                                                    | Spectral (FFT)                            | Alpha increase in amplitude and gets slower. Usually spread from occipital to parietal<br><br>Theta burts. Start frontal and spread posterior<br><br>Beta appeared in 4 participants and was related with deeper states of meditation (trancendence).<br>Starts frontal and spread posterior<br><br>No habituation in Alpha blocking        |

| Autors                                                                                        | Title                                                                                              | Year | Meditation                                                                                                          | Meditation category (ADM,NDM,CDM) | Eyes open or closed?   | Number electrodes                                                           | EEG reference                                                                                                                               | Number participants                                                                             | Experience                                                                                                           | Design                                                                                                                                             | Method                                                                                                | Result                                                                                                                                                                                                                                                                                                                                                                                                                                         |
|-----------------------------------------------------------------------------------------------|----------------------------------------------------------------------------------------------------|------|---------------------------------------------------------------------------------------------------------------------|-----------------------------------|------------------------|-----------------------------------------------------------------------------|---------------------------------------------------------------------------------------------------------------------------------------------|-------------------------------------------------------------------------------------------------|----------------------------------------------------------------------------------------------------------------------|----------------------------------------------------------------------------------------------------------------------------------------------------|-------------------------------------------------------------------------------------------------------|------------------------------------------------------------------------------------------------------------------------------------------------------------------------------------------------------------------------------------------------------------------------------------------------------------------------------------------------------------------------------------------------------------------------------------------------|
| Williams P, West M                                                                            | EEG responses to photic stimulation in persons experienced at meditation                           | 1975 | TM                                                                                                                  | NDM                               | Eyes closed            | 4                                                                           | bipolar recordings                                                                                                                          | 10 control (all males)<br>9 meditators (all males)                                              | 10-72 months (average 31 months)                                                                                     | Photic stimulation in resting state eyes closed                                                                                                    | NA (maybe visual inspection)                                                                          | Smaller alpha blocking habituation in meditators than in control group                                                                                                                                                                                                                                                                                                                                                                         |
| Tebecis, A. K.                                                                                | A controlled study of the eeg during transcendental meditation: Comparison with hypnosis           | 1975 | TM                                                                                                                  | NDM                               | Eyes closed/Eyes open  | 2                                                                           | NA                                                                                                                                          | Meditators: 12 (14 males)<br>Controls: 14 (8 males)                                             | "at least some months".<br>Mean 19.8 months                                                                          | Meditation vs Hypnosis<br>they also acquired baseline with eyes open and closed                                                                    | Spectral                                                                                              | Higher mean theta density, during both meditation and non-meditation. Nevertheless, the hypnosis group presented more theta than the meditation group.                                                                                                                                                                                                                                                                                         |
| Pagano RR, Rose RM, Silvers RM, Warrenburg S                                                  | Sleep during transcendental meditation                                                             | 1976 | TM                                                                                                                  | NDM                               | Eyes closed            | 3 (occipital, central and frontal)                                          | M1                                                                                                                                          | 5                                                                                               | at least 2.5 years                                                                                                   | Meditation vs Naps                                                                                                                                 | NA (maybe visual inspection)                                                                          | On average 19% of time in Sleep stage 1 and 17%, 23% in stage 3 and 27% in stages 3 and 4                                                                                                                                                                                                                                                                                                                                                      |
| Fenwick PBC, Donaldson S, Gillis PL, Bushman J, Fenton PGW, Perry I, Tisley C, Serafinowicz H | Metabolic and EEG changes during transcendental meditation: An explanation.                        | 1977 | TM                                                                                                                  | NDM                               | Eyes closed            | 6                                                                           | NA                                                                                                                                          | 11 Meditators<br>7 Controls (predominantly non-meditators)- Classic music<br>8 Controls-Fasting | "completed a course of instruction in TM"                                                                            | Meditators: before, during and after meditation<br>Controls: fasting and listening classic music                                                   | Multimodal (oxygen consumption)<br>Visual inspection                                                  | No EEG findings- they were all related to drowsiness                                                                                                                                                                                                                                                                                                                                                                                           |
| Elson BD, Hauri P, Cunis D                                                                    | Physiological changes in yoga meditation.                                                          | 1977 | Ananda Marga                                                                                                        | NDM                               | Eyes Closed/ Eyes open | 1                                                                           | Ear                                                                                                                                         | 10 meditators and a professor with 54 months of practice; and 11 controls                       | (9-31 months of practice) and professor with 54 months                                                               | baselines with eyes closed and open-> Meditation -> baselines with eyes closed and open                                                            | Visual Criteria (technician experienced in using standardized sleep stage criteria)<br><br>Multimodal | Meditators had mor non-descending alpha-theta than controls and remained at a relative constant level                                                                                                                                                                                                                                                                                                                                          |
| Hebert R, Lehmann D                                                                           | Theta bursts: an EEG pattern in normal subjects practising the transcendental meditation technique | 1977 | TM                                                                                                                  | NDM                               | Eyes Closed            | at least 10 scalp location (10/20 system) primarily in referential montages | NA                                                                                                                                          | 78 (60 males)                                                                                   | 24-140 - mean 56.1 months<br>54 control subjects (35 males)                                                          | 5-10 min EO before and after a period of about 25 min of meditation                                                                                | Visual Observation<br>Spectral (Fourier)<br><br>Multimodal                                            | From meditation records 286 criterionmeeting theta bursts were seen in 21 of the 78 subjects.                                                                                                                                                                                                                                                                                                                                                  |
| Akers TK, Tucker DM, Roth RS, Vidloff JS                                                      | Personality correlates of EEG change during meditation                                             | 1977 | Christian Meditation (listened to a tape recording of their regular instructor as he presented a topic of devotion) | CDM-FA                            | Eyes Closed            | 2 (O1 and O2)                                                               | NA                                                                                                                                          | 15 (all males)                                                                                  | NA                                                                                                                   | mental arithmetic, taped devotion, meditation in silence                                                                                           | NA (maybe visual inspection)                                                                          | As many subjects decreased as increased their alpha production during meditation.                                                                                                                                                                                                                                                                                                                                                              |
| Morse DR, Martin JS, Furst ML, Dubin LL                                                       | A physiological and subjective evaluation of meditation, hypnosis, and relaxation                  | 1977 | TM                                                                                                                  | NDM                               | Eyes Closed            | 4 (right frontal, parietal, temporal and occipital)                         | Occipital region                                                                                                                            | Meditation 12<br>Hypnosys 12<br>Meditation and Hyp 12<br>Naive in both 12                       | Meditators (2 mo-5ye; mean 1.3ye)<br>Hypnosis (3mo-10ye; mean 1ye)<br>Meditators and Hypnosis (6mo-8ye; mean 3.8 ye) | 6 conditions:<br>Alert<br>Relaxation<br>HeteroHypnosysRelaxation<br>HeteroHypnosysTask<br>AutoHypnosysRelaxation<br>Meditation (TM or simple word) | Multimodal<br>Visual inspection                                                                       | Significant differences between task-hypnosis and relaxation-hypnosis. No significant differences were found between meditation and simple word meditation.                                                                                                                                                                                                                                                                                    |
| Levine, P. H., Hebert, J. R., Haynes, C. T., and Strobel, U                                   | Eeg coherence during the transcendental meditation technique                                       | 1977 | TM                                                                                                                  | NDM                               | Eyes Closed/ Eyes open | 10                                                                          | No uniform convention on reference electrode placement was in force, with homolateral, contralateral, and linked ears being variously used. | 7 Novice (5 males)<br>21 Experienced (10 males)                                                 | 0-15 years                                                                                                           | Eyes-open precontrol, eyes-closed precontrol, Meditation, eyes-closed postcontrol, eyes-open postcontrol                                           | Coherence                                                                                             | Coherence between F3/F4, C3/C4, C3/F3 e C4/F4.<br><br>Increase in the height and/or incidence of coherence peaks in the alpha band with onset of meditation but without a marked decrease at the end of that period.<br><br>Spreading of coherence peaks to other - generally lower - frequencies during meditation.<br><br>Abrupt onset of strong coherence with the start of the meditation and abrupt decrease at the end of the technique. |
| Corby JC, Roth WT, Zarcone VP Jr, Kopell BS                                                   | Psychophysiological correlates of the practice of Tantric Yoga meditation                          | 1978 | Ananda Marga                                                                                                        | NDM                               | Eyes Closed            | 1 (Cz)                                                                      | Joined mastoids                                                                                                                             | 3 groups of 10 naive subjects                                                                   | Trainees - average of 2.1years<br>Experts - average of 4.4 years                                                     | 3 conditions: 1) baseline;<br>2) withdraw condition - preparation;<br>3) Meditation                                                                | Multimodal<br>Spectral<br>EP (Auditory)                                                               | Meditators increase theta with meditation more than controls<br><br>Alpha power tended to increase as subjects meditated (n.s.)<br><br>EP: Compared N1, P2 and P3.<br>P2, P3 and N1 amplitudes progressively decreased for infrequent tones as subjects entered meditation, but P2 and P3 increased for frequent ones                                                                                                                          |
| Barwood TJ, Empson JA, Lister SG, Tilley AJ                                                   | Auditory evoked potentials and transcendental meditation                                           | 1978 | TM                                                                                                                  | NDM                               | Eyes Open              | 1                                                                           | Left mastoid                                                                                                                                | 8                                                                                               | 18 months - 6 years                                                                                                  | 3 Blocks of 50 stimuli before, during and after meditation<br><br>1 block at sleep onset                                                           | EP (auditory)                                                                                         | Analysed: amplitude and latency of the N1, P1 and N2 peaks.<br>No consistent changes were noted between baseline and meditating AEPs and from meditation and light sleep                                                                                                                                                                                                                                                                       |

| Autors                                                 | Title                                                                                                                                                           | Year | Meditation          | Meditation category (ADM,NDM,CDM) | Eyes open or closed?   | Number electrodes                                                                              | EEG reference   | Number participants                                                                                          | Experience                                                                                                                                                                              | Design                                                                                                                                                                                                             | Method                                      | Result                                                                                                                                                                                                                                                                                                            |
|--------------------------------------------------------|-----------------------------------------------------------------------------------------------------------------------------------------------------------------|------|---------------------|-----------------------------------|------------------------|------------------------------------------------------------------------------------------------|-----------------|--------------------------------------------------------------------------------------------------------------|-----------------------------------------------------------------------------------------------------------------------------------------------------------------------------------------|--------------------------------------------------------------------------------------------------------------------------------------------------------------------------------------------------------------------|---------------------------------------------|-------------------------------------------------------------------------------------------------------------------------------------------------------------------------------------------------------------------------------------------------------------------------------------------------------------------|
| Warrenburg S, Pagano RR, Woods M, Hlastala M           | A comparison of somatic relaxation and EEG activity in classical progressive relaxation and transcendental meditation                                           | 1980 | TM                  | NDM                               | Eyes Closed            | 2 (C4, O2)                                                                                     | A1              | Experienced meditators: 9 (3 males)<br>Experienced Relaxation: 9 (3 males)<br>Novice Relaxation: 9 (3 males) | Experienced meditators: mean 3.4 years<br>Experienced Relaxation: mean 6.4 years                                                                                                        | Relaxation Group (experienced) X Meditation X novice relaxation<br>They had a baseline with eyes closed and red a book                                                                                             | Multimodal<br>Visual inspection             | Subjects were awake even with eyes closed<br>Short duration, high amplitude theta bursts                                                                                                                                                                                                                          |
| McEvoy TM, Frumkin LR, Harkins SW                      | Effects of meditation on brainstem auditory evoked potentials                                                                                                   | 1980 | TM                  | NDM                               | NA                     | 1 (Cz)                                                                                         | Mastoid         | 5 (1 male)<br>5 controls                                                                                     | 6-9 years                                                                                                                                                                               | before and after meditation. Stimulus at different intensities                                                                                                                                                     | EP (auditory)                               | Compared: waves I, II, III, and V<br>No pre-postmeditation differences at low stimulus intensities. Latency of the inferior collicular wave (wave V) increased following meditation at moderate intensities<br>Latency slightly decreased at higher stimulus intensities.                                         |
| Banquet, J. and Lesevre, N                             | Event-related potentials in altered states of consciousness                                                                                                     | 1980 | Yoga meditation     | NA                                | NA                     | 9                                                                                              | Linked ears     | 10 experimental (meditators)<br>10 controls                                                                  | NA                                                                                                                                                                                      | visual choice reaction time task.<br>choice reaction time task pre and post meditation or resting states (for control group)<br>Go/No-Go task                                                                      | ERP(Visual)                                 | P200 was significantly higher in pre and post for the meditators group compared to controls<br>N120 was higher post meditation for the meditation group compared to controls<br>The average response time for the meditators group occur before the P300 peak and has a smaller latency when compared to controls |
| Dillbeck MC, Bronson EC                                | Short-term longitudinal effects of the transcendental meditation technique on EEG power and coherence                                                           | 1981 | TM                  | NDM                               | Eyes closed            | 4 (F3, F4, O1, O2)                                                                             | Linked mastoids | 15                                                                                                           | 2-week retreat (2 practices a day)                                                                                                                                                      | Before and after retreat                                                                                                                                                                                           | Spectral (FFT)<br>Coherence                 | Increased coherence in frontal electrodes in alpha                                                                                                                                                                                                                                                                |
| Dillbeck, M. C., Orme-Johnson, D.W., and Wallace, R. K | Frontal eeg coherence, h-reflex recovery, concept learning, and the tm-sidhi program                                                                            | 1981 | TM                  | NDM                               | Eyes closed            | 11 (F3, F4, C3, C4, P3, P4, O1, O2, T3, T4, Cz, and EOG)                                       | Linked ears     | 12 - Experimental<br>13 - Controls                                                                           | Experimental group undertook a three month TM-Sidhi program                                                                                                                             | Subjects did a Concept-learning task before and after three months                                                                                                                                                 | Spectral (FFT)<br>Coherence<br>H-Reflex     | Found a relationship in frontal EEG coherence and H-reflex recovery that improved after TM                                                                                                                                                                                                                        |
| Stigsby B, Rodenberg JC, Moth HB                       | Electroencephalographic findings during mantra meditation (transcendental meditation). A controlled, quantitative study of experienced meditators               | 1981 | TM                  | NDM                               | Eyes Closed            | 10 (mas em montagens bipolares, needles)                                                       | NA              | 13 (8 males)                                                                                                 | at least 2 years (up to 8 years)                                                                                                                                                        | baseline before and after, meditation, drowsiness, sleep onset and sleep                                                                                                                                           | Multimodal<br>Visual Inspection<br>Spectral | The EEG frequency spectra constituted a continuum with increasing theta and delta activity and decreasing alpha activity as the participants tended to fall asleep.<br>No consistent EEG pattern associated with a successful or unsuccessful meditation                                                          |
| Becker DE, Shapiro D                                   | Physiological responses to clicks during Zen, Yoga, and TM meditation                                                                                           | 1981 | Zen<br>Yoga<br>TM   | NDM                               | Eyes closed            | 2 (Cz, Oz)                                                                                     | Right ear (A2)  | 30 meditators (10 TM, 10 Yoga, 10 Zen)<br>10 controls (attend)<br>10 controls (resting)                      | Zen: 3 to 20 years<br>Yoga: 3 to 8.5 years<br>TM: 3.5 to 10.5 years                                                                                                                     | meditation vs attend vs resting                                                                                                                                                                                    | EP (auditory)<br>Spectral<br>Multimodal     | Alpha blocking and habituation in all groups<br>No difference for P200 and P300<br>Enhanced N100 amplitude in Yoga and TM                                                                                                                                                                                         |
| Farrow JT, Hebert JR                                   | Breath suspension during the transcendental meditation technique                                                                                                | 1982 | TM                  | NDM                               | Eyes open/ Eyes closed | 9 (F3, F4, C3, C4, T3, Pz, O1, O2, Oz)                                                         | Linked ears     | 1                                                                                                            | 16 years                                                                                                                                                                                | Eyes open; eyes closed but not practicing TM; TM; Eyes closed but not practicing TM; Eyes open.                                                                                                                    | Spectral (FFT)<br>Coherence<br>Multimodal   | Bursts of theta, sometimes accompanied by bursts in other frequencies<br>Theta power peaked after breath suspension<br>Alpha power increases<br>EEG coherence higher in theta, alpha and beta before and during pure consciousness, with a sharp decrease afterward                                               |
| Badawi K, Wallace RK, Orme-Johnson D, Rouzere AM       | Electrophysiologic characteristics of respiratory suspension periods occurring during the practice of the Transcendental Meditation Program                     | 1984 | TM                  | NDM                               | Eyes closed            | For some: 9 (F3, F4, C3, Cz, C4, T3, T4, O1, O2)<br>For others: 6 (F3, F4, C3, C4, O3, and O4) | Linked ears     | 54 meditators<br>30 meditators (active control- breath suppression)<br>31 non-meditators                     | 16-144 months<br>1-113 months (active control)                                                                                                                                          | meditation vs rest                                                                                                                                                                                                 | Spectral (FFT)<br>Coherence<br>Multimodal   | Increased alpha power and theta spindles<br>EEG coherence increase during breath suspension (all bands) in meditation, not present in control                                                                                                                                                                     |
| Heide FJ                                               | Psychophysiological responsiveness to auditory stimulation during transcendental meditation                                                                     | 1986 | TM                  | NDM                               | Eyes closed            | 1                                                                                              | NA              | 17 meditators<br>17 controls                                                                                 | 8-66 months                                                                                                                                                                             | Meditation (meditators) vs rest (controls)                                                                                                                                                                         | Multimodal<br>Alpha blocking                | No differences between groups                                                                                                                                                                                                                                                                                     |
| Dillbeck MC, Vesely SA                                 | Participation in the transcendental meditation program and frontal EEG coherence during concept learning                                                        | 1986 | TM                  | NDM                               | Eyes closed            | 7 (F3, F4, C3, C4, O1, O2, EOG)                                                                | Linked ears     | 16 meditators<br>16 controls                                                                                 | 47.2 months                                                                                                                                                                             | Meditation (meditators) vs rest (controls)                                                                                                                                                                         | Coherence                                   | Higher alpha and beta coherence in frontal electrodes                                                                                                                                                                                                                                                             |
| Severtsen B, Bruya MA                                  | Effects of meditation and aerobic exercise on EEG patterns                                                                                                      | 1986 | "mantra meditation" | CDM - FA                          | Eyes open/ Eyes closed | NA                                                                                             | NA              | 5 meditators<br>5 exercise                                                                                   | Novice                                                                                                                                                                                  | Meditation vs Exercise group<br>All at recordings at rest                                                                                                                                                          | Spectral                                    | No differences between groups                                                                                                                                                                                                                                                                                     |
| Gaylord, C., Orme-Johnson, D., and Travis, F           | The Effects of the Transcendental Meditation Technique and Progressive Muscle Relaxation on Eeg Coherence, Stress Reactivity, and Mental Health in Black Adults | 1989 | TM                  | NDM                               | Eyes closed            | 6                                                                                              | Linked ears     | Randomly assigned<br>Meditators: 25<br>Relaxation: 29<br>Control: 29                                         | They took a 10 hours course over six days. They were encouraged to practice daily for 20 minutes and to meet a group once a week for 2.5 months.<br>They were posttested one year later | Resting with eyes open -> resting eyes closed -> practiced relaxation procedure and the control group was asked to relax as deeply as possible -> resting eyes closed second time -> resting eyes open second time | Multimodal<br>Coherence                     | No longitudinal changes in EEG                                                                                                                                                                                                                                                                                    |

| Autors                                                            | Title                                                                                                                                                 | Year | Meditation                                                                                                                                     | Meditation category (ADM,NDM,CDM) | Eyes open or closed? | Number electrodes          | EEG reference                                                                                                                                | Number participants                                                                                     | Experience                                                        | Design                                                                          | Method                              | Result                                                                                                                                                                                                                                                                                                                                      |
|-------------------------------------------------------------------|-------------------------------------------------------------------------------------------------------------------------------------------------------|------|------------------------------------------------------------------------------------------------------------------------------------------------|-----------------------------------|----------------------|----------------------------|----------------------------------------------------------------------------------------------------------------------------------------------|---------------------------------------------------------------------------------------------------------|-------------------------------------------------------------------|---------------------------------------------------------------------------------|-------------------------------------|---------------------------------------------------------------------------------------------------------------------------------------------------------------------------------------------------------------------------------------------------------------------------------------------------------------------------------------------|
| Zhang W, Zheng R, Zhang B, Yu W, Shen X                           | An observation on flash evoked cortical potentials and Qigong meditation                                                                              | 1993 | Qigong-focusing on Dantian                                                                                                                     | CDM - FA                          | Eyes Open            | 1 (Oz)                     | Right ear (A2)                                                                                                                               | 14 experienced<br>12 begginer experience<br>11 controls                                                 | experienced: 0.5-5.5 years<br>beginners: 0.5-3 months             | Flashes before, during and after Qigong meditation                              | EP (visual)                         | VEP amplitudes increased during meditation in advanced practitioners                                                                                                                                                                                                                                                                        |
| Telles S, Nagarathna R, Nagendra HR, Desiraju T                   | Alterations in auditory middle latency evoked potentials during meditation on a meaningful symbol—"Om"                                                | 1994 | "Om" meditation                                                                                                                                | CDM-FA                            | Eyes closed          | 1 (Cz)                     | Left ear (A1)                                                                                                                                | 9 meditators (all males)<br>9 naive (all males)                                                         | more than 10 years of experience (12.4 SD 1.8 years)              | Sham meditation ("One"), Meditation ("Om"), baseline before and after           | EP (auditory)                       | Evaluated wave V, Na and Pa<br><br>Meditators: increase in the peak amplitude of Na wave during meditation<br>reduction in the Na wave peak amplitude during control sessions.<br><br>Naive: significant decrease in the Na wave peak amplitude during meditation sessions<br><br>No significant changes in short latency wave V or Pa wave |
| Travis F, Wallace RK                                              | Autonomic patterns during respiratory suspensions: possible markers of Transcendental Consciousness                                                   | 1997 | TM                                                                                                                                             | NDM                               | Eyes closed          | 19                         | NA                                                                                                                                           | 78 (60 males)                                                                                           | 0.4-22.5 years (Mean 12.6)                                        | three phases of TM: inward strole, Transcendental Consciousness, outward stroke | Multimodal Spectral                 | Outward stroke not obtained for all participants<br><br>Difference between Transcendental Consciousness and inward stroke: decreased theta and increased alpha                                                                                                                                                                              |
| Lee MS, Bae BH, Ryu H, Sohn JH, Kim SY, Chung HT                  | Changes in alpha wave and state anxiety during ChunDoSunBup Qi-training in trainees with open eyes                                                    | 1997 | Qigong - ChunDoSun Bup Qi                                                                                                                      | CDM-FA                            | Eyes open            | 6 (F3, F4, C3, C4, O1, O2) | Earlobes (A1 and A2)                                                                                                                         | 13 (7 males)                                                                                            | 1-3 years                                                         | Analysis of distinct states of Qigong. (2 of them have movements)               | Spectral (FFT)                      | Increased alpha in occipital region                                                                                                                                                                                                                                                                                                         |
| Travis F, Wallace RK                                              | Autonomic and EEG patterns during eyes-closed rest and transcendental meditation (TM) practice: the basis for a neural model of TM practice           | 1999 | TM                                                                                                                                             | NDM                               | Eyes Closed          | 6 (F3, F4, C3, C4, P3, P4) | Linked mastoids                                                                                                                              | 20 (13 males)                                                                                           | 1.9-25.5 ya (Mean 9.9)                                            | meditation vs resting (order counterbalanced)                                   | Spectral (FFT) Coherence            | FFT: No significant main effects for condition with alpha percentage<br><br>Coherence: Higher anterior-posterior and frontal alpha coherence during TM practice                                                                                                                                                                             |
| Dunn BR, Hartigan JA, Mikulas WL                                  | Concentration and mindfulness meditations: unique forms of consciousness?                                                                             | 1999 | "Concentration (focus on breath) and Mindfulness (letting one's attention freely move to various objects and to notice these objects clearly)" | CDM - FA/OM                       | Eye Closed           | 19                         | Linked ears                                                                                                                                  | 10                                                                                                      | 8-10 weeks in concentration followed by 8-10 weeks in mindfulness | baseline -> Concentration Meditation -> Mindfulness                             | Spectral (FFT)                      | Mindfulness produced more delta, theta, alpha and beta 1 than concentration condition.                                                                                                                                                                                                                                                      |
| Travis F, Tecce JJ, Guttman J                                     | Cortical plasticity, contingent negative variation, and transcendent experiences during practice of the Transcendental Meditation technique           | 2000 | TM                                                                                                                                             | NDM                               | Eyes Closed          | 3 (Fz, Cz and Pz)          | NA                                                                                                                                           | Non meditators: 14 (7 males)<br>Novice meditators: 13 (6 males)<br>Experienced meditators: 14 (8 males) | Novice: mean 1.1 year<br>Experienced: mean 8.53                   | 3 groups.<br>No meditators<br>Novice meditators<br>Experienced meditators       | ERP (CNV)                           | CNV has smallest value in non meditators and largest in experienced meditators                                                                                                                                                                                                                                                              |
| Kubota Y, Sato W, Toichi M, Mura T, Okada T, Hayashi A, Sengoku A | Frontal midline theta rhythm is correlated with cardiac autonomic activities during the performance of an attention demanding meditation procedure.   | 2001 | Zen (Su-soko)                                                                                                                                  | CDM-FA                            | Eyes Open            | 19                         | Electrodes in right hemisphere and Fz, Cz and Pz referred to the right earlobe<br>Electrodes in left hemisphere referred to the left earlobe | 25 (11 males) - but only 12 were analysed (6 males)                                                     | none                                                              | Meditation vs baseline                                                          | Multimodal Spectral (FFT)           | Increased power in Theta signals over the mid-frontal areas.<br><br>No difference in occipital alpha                                                                                                                                                                                                                                        |
| Travis F                                                          | Autonomic and EEG patterns distinguish transcending from other experiences during Transcendental Meditation practice                                  | 2001 | TM                                                                                                                                             | NDM                               | Eyes Closed          | 9                          | Linked ears                                                                                                                                  | 30 (21 males)                                                                                           | 5.4 years                                                         | Recordings during meditation. There was a sound bell at spaced time intervals   | Multimodal Spectral Coherence       | In experiences classified as 'transcendence'<br><br>higher Alpha amplitude<br>higher Alpha coherence                                                                                                                                                                                                                                        |
| Travis F, Olson T, Egenes T, Gupta HK                             | Physiological patterns during practice of the Transcendental Meditation technique compared with patterns while reading Sanskrit and a modern language | 2001 | TM                                                                                                                                             | NDM                               | Eyes closed          | 6                          | Linked ears                                                                                                                                  | 18 (7 males)                                                                                            | NA                                                                | Meditation vs reading Sanskrit and other modern languages                       | Multimodal Spectral (FFT) Coherence | Alpha power and coherence were significantly higher when reading Sanskrit and during meditation practice, compared to reading modern languages.                                                                                                                                                                                             |
| Arambula P, Peper E, Kawakami M, Gibney KH                        | The physiological correlates of Kundalini Yoga meditation: a study of a yoga master                                                                   | 2001 | Kundalini Yoga                                                                                                                                 | CDM- FA                           | Eyes Closed          | 2 (O2, P4)                 | Right earlobe                                                                                                                                | 1 male                                                                                                  | 32 years                                                          | Meditation vs baseline before and after practice                                | Multimodal Spectral                 | Increase in alpha activity compared to pre and post baseline<br>Increase in theta immediately following meditation                                                                                                                                                                                                                          |

| Autors                                                                                                                           | Title                                                                                                                                                                    | Year | Meditation                  | Meditation category (ADM,NDM,CDM) | Eyes open or closed?   | Number electrodes | EEG reference   | Number participants                                                                                   | Experience                                                                    | Design                                                                                                                                                                     | Method                                                        | Result                                                                                                                                                                                                                                                                                                                                                                                                                                                                                                                                                                                                             |
|----------------------------------------------------------------------------------------------------------------------------------|--------------------------------------------------------------------------------------------------------------------------------------------------------------------------|------|-----------------------------|-----------------------------------|------------------------|-------------------|-----------------|-------------------------------------------------------------------------------------------------------|-------------------------------------------------------------------------------|----------------------------------------------------------------------------------------------------------------------------------------------------------------------------|---------------------------------------------------------------|--------------------------------------------------------------------------------------------------------------------------------------------------------------------------------------------------------------------------------------------------------------------------------------------------------------------------------------------------------------------------------------------------------------------------------------------------------------------------------------------------------------------------------------------------------------------------------------------------------------------|
| Aftanas LI, Golosheikine SA                                                                                                      | Human anterior and frontal midline theta and lower alpha reflect emotionally positive state and internalized attention: high-resolution EEG investigation of meditation. | 2001 | Sahaja Yoga                 | CDM-OM                            | Eyes closed            | 62                | Tip of the nose | Short-term: 11 (5 males)<br>Long-term: 17 (7 males)                                                   | Short-term: less than 6 months<br>Long-term: 3-7 years                        | Meditation vs baseline before and after practice                                                                                                                           | Spectral (FFT)<br>Coherence                                   | Increased anterior frontal and midline theta synchronization as well as theta long range connectivity between prefrontal and posterior association cortex.                                                                                                                                                                                                                                                                                                                                                                                                                                                         |
| Lehmann D, Faber PL, Achermann P, Jeanmonod D, Gianotti LR, Pizzagalli D                                                         | Brain sources of EEG gamma frequency during volitionally meditation-induced, altered states of consciousness, and experience of the self                                 | 2001 | Several tibetan meditations | CDM- FA<br>NDM                    | Eyes Open              | 27                | NA              | 1                                                                                                     | Long-term buddhist lama                                                       | 5 different practices<br>1) Buddha in front meditator<br>2) Buddha above meditator<br>3) Internal verbalization of mantra<br>4) Self-dissolution<br>5) Self-reconstruction | Source (Dipole and LORETA)                                    | Analysis in Gamma<br>Dipole: the locations differed from each other significantly along at least one of the three dimensions in the comparisons between all meditations except for self-dissolution vs. self-reconstitution.<br><br>LORETA: Each meditation has different sources (except self-dissolution and self-reconstruction).                                                                                                                                                                                                                                                                               |
| Aftanas LI, Golosheikine SA                                                                                                      | Non-linear dynamic complexity of the human EEG during meditation                                                                                                         | 2002 | Sahaja Yoga                 | CDM-OM                            | Eyes closed            | 62                | Tip of the nose | 20 (9 males)                                                                                          | experienced (NR)                                                              | Resting vs Meditation                                                                                                                                                      | Non-Linear (Dimensional Complexity-DCx)                       | DCx estimates negatively correlate with theta-2 and alpha-1, and positively with beta-3.                                                                                                                                                                                                                                                                                                                                                                                                                                                                                                                           |
| Travis F, Tecce J, Arenander A, Wallace RK                                                                                       | Patterns of EEG coherence, power, and contingent negative variation characterize the integration of transcendental and waking states                                     | 2002 | TM                          | NDM                               | Eyes closed            | 9                 | Linked ears     | 51<br>No meditators: 17 (9 males)<br>Median experience: 17 (9 males)<br>Most experience: 17 (9 males) | Median experience: mean 7.8 year<br>Most experience: mean 24.5 years          | Analysis of periods away from meditation, to asses only long-term effects.<br><br>CNV task -> rest eyes closed/ meditation                                                 | ERP (CNV)<br>Spectral (FFT)<br>Coherence<br>Linear regression | In most experienced individuals, CNV was higher in simple but lower in choice trials, and 6/12 Hz EEG amplitude and broadband frontal EEG coherence were higher during choice trials.<br><br>Increased EEG amplitude and coherence, characteristic of TM practice, appeared to become a stable EEG trait during CNV tasks in these subjects. These significant EEG differences may underlie the inverse patterns in CNV amplitude seen between groups.<br><br>CNV amplitudes are highest in the simple trials and lowest in the choice trials for the most experienced group relative to the median experience one |
| Aftanas LI, Golosheikin SA                                                                                                       | Changes in cortical activity in altered states of consciousness: the study of meditation by high-resolution EEG.                                                         | 2003 | Sahaja yoga                 | CDM-OM                            | Eyes closed            | 62                | Tip of the nose | Novice meditators (NMs): 11 (5 males)<br>Experienced Meditators (EMs): 16 (6 males)                   | Novice meditators (NMs): < 6months<br>Experienced Meditators (EMs): 3-6 years | Rest vs three sequential meditation stages:<br>1- enter into meditation<br>2- deep meditation<br>3- exit from meditation                                                   | Spectral (IAF)<br>Coherence                                   | EMs in resting state: Lower IAF<br>Higher $\theta$ -, $\alpha$ 1-, $\alpha$ 2-, and $\alpha$ 3-band power values compared to NMs<br><br>Effective achievement of altered states of consciousness in EMs: associated with an increase in the local $\theta$ - and $\alpha$ 1 powers in the anterior cortical areas, as well as long-distance coherence between the prefrontal and posterior associative cortex with the formation of a center of gravity in the left prefrontal region (lead AF3)                                                                                                                   |
| Davidson RJ, Kabat-Zinn J, Schumacher J, Rosenkranz M, Muller D, Santorelli SF, Urbanowski F, Harrington A, Bonus K, Sheridan JF | Alterations in brain and immune function produced by mindfulness meditation                                                                                              | 2003 | MBSR                        | CDM - FA/OM                       | Eyes open/ Eyes closed | 27 (only used 8)  | Linked ears     | 25 meditation group (6 males)<br>16 waiting list (6 males)                                            | 8 weeks                                                                       | randomized controlled study<br><br>before, immediately after, and 4 months after program                                                                                   | Spectral ( $\alpha$ asymmetry)                                | Anterior activation asymmetry in alpha as a function of meditation training                                                                                                                                                                                                                                                                                                                                                                                                                                                                                                                                        |
| Murata T, Takahashi T, Hamada T, Omori M, Kosaka H, Yoshida H, Wada Y                                                            | Individual trait anxiety levels characterizing the properties of zen meditation                                                                                          | 2004 | Zen (Su-soko)               | CDM- FA                           | Eyes open              | 4                 | linked ears     | 22                                                                                                    | No experience                                                                 | Supine position<br>Meditation vs synchronized breath                                                                                                                       | Multimodal<br>Coherence                                       | Slow alpha interhemispheric coherence in the frontal region significantly increased during meditation                                                                                                                                                                                                                                                                                                                                                                                                                                                                                                              |
| Lutz A, Greischar LL, Rawlings NB, Ricard M, Davidson RJ                                                                         | Long-term meditators self-induce high-amplitude gamma synchrony during mental practice                                                                                   | 2004 | Loving-kindness             | ADM                               | NA                     | 128               | Cz              | 8 Long term practitioners<br>10 healthy students                                                      | 15-40 years<br>No experience                                                  | 30s Resting - 60s meditation (4x)                                                                                                                                          | Spectral (FFT)                                                | High amplitude gamma oscillations in EEGs, not present in baseline, in long-term practitioners                                                                                                                                                                                                                                                                                                                                                                                                                                                                                                                     |
| Takahashi T, Murata T, Hamada T, Omori M, Kosaka H, Kikuchi M, Yoshida H, Wada Y                                                 | Changes in EEG and autonomic nervous activity during meditation and their association with personality traits                                                            | 2005 | Zen (Su-soko)               | CDM-FA                            | Eyes open              | 6                 | Linked ears     | 20 all males                                                                                          | Novices                                                                       | Supine position<br>Meditation vs synchronized breath                                                                                                                       | Multimodal<br>Spectral (FFT)                                  | Power Spectra. Increase in power of Alpha 1 and theta 2, in particular on frontal electrodes.<br><br>No Alpha power change in occipital electrodes, indicating the subjects were not drowsy                                                                                                                                                                                                                                                                                                                                                                                                                        |
| Aftanas L., Golosheykin S                                                                                                        | Impact of regular meditation practice on EEG activity at rest and during evoked negative emotions                                                                        | 2005 | Sahaja Yoga                 | CDM-OM                            | Eyes open/ Eyes closed | 62                | Tip of nose     | 25 meditators (12 males)<br>25 controls (13 males)                                                    | 5-10 years                                                                    | Eyes closed, eyes open, neutral and emotional movie clip conditions                                                                                                        | Spectral (FFT)                                                | EEG data collapsed into 9 regional means<br><br>At eyes closed the meditation group had larger power values in theta1, theta 2 and alpha1 bands.<br><br>Theta 2 and alpha 1 remained higher with eyes open<br><br>Alpha 1 remained higher when viewing neutral movie clip                                                                                                                                                                                                                                                                                                                                          |

| Autors                                                                                                                                                     | Title                                                                                                                                                                  | Year | Meditation                                         | Meditation category (ADM,NDM,CDM) | Eyes open or closed? | Number electrodes | EEG reference                                                                                                                                             | Number participants                                                                          | Experience                                                                                                                                                                                  | Design                                                                                                                                                                                                                                      | Method                                                        | Result                                                                                                                                                                                                                                                                                                                                                                                                           |
|------------------------------------------------------------------------------------------------------------------------------------------------------------|------------------------------------------------------------------------------------------------------------------------------------------------------------------------|------|----------------------------------------------------|-----------------------------------|----------------------|-------------------|-----------------------------------------------------------------------------------------------------------------------------------------------------------|----------------------------------------------------------------------------------------------|---------------------------------------------------------------------------------------------------------------------------------------------------------------------------------------------|---------------------------------------------------------------------------------------------------------------------------------------------------------------------------------------------------------------------------------------------|---------------------------------------------------------------|------------------------------------------------------------------------------------------------------------------------------------------------------------------------------------------------------------------------------------------------------------------------------------------------------------------------------------------------------------------------------------------------------------------|
| Lehmann D, Faber PL, Gianotti LR, Kochi K, Pascual-Marqui RD                                                                                               | Coherence and phase locking in the scalp EEG and between LORETA model sources, and microstates as putative mechanisms of brain temporo-spatial functional organization | 2006 | Chi'an                                             | CDM - FA                          | NA                   | 27                | Recomputation for different references<br>Coherence was computed between all 351 possible pairs of the 27 electrodes, and for each electrode combination. | 1                                                                                            | "very experienced"                                                                                                                                                                          | Resting vs Meditation                                                                                                                                                                                                                       | Source (LORETA)<br>Synchrony (PLV)<br>Coherence in LORETA ROI | Coherence is highly dependent on reference, should use intracerebral time series.                                                                                                                                                                                                                                                                                                                                |
| Yamamoto S, Kitamura Y, Yamada N, Nakashima Y, Kuroda S                                                                                                    | Medial prefrontal cortex and anterior cingulate cortex in the generation of alpha activity induced by transcendental meditation: a magnetoencephalographic study       | 2006 | TM                                                 | NDM                               | Eyes closed          | More than 6       | Linked ears                                                                                                                                               | 8 control (4 males)<br>8 meditators (4 males)                                                | Average 3.9                                                                                                                                                                                 | Sham meditation vs TM meditation (20 min)                                                                                                                                                                                                   | Multimodal (MEG)<br>Spectral (FFT)                            | Higher Alpha in frontal area during TM                                                                                                                                                                                                                                                                                                                                                                           |
| Travis F, Arenander A                                                                                                                                      | Cross-sectional and longitudinal study of effects of transcendental meditation practice on interhemispheric frontal asymmetry and frontal coherence                    | 2006 | TM                                                 | NDM                               | Eyes closed          | 9                 | Linked ears                                                                                                                                               | Study 1:<br>13 control group (5 male)<br>12 TM group (6 male)<br><br>Study 2:<br>14 (9 male) | Study 1<br>Average 21.9 years                                                                                                                                                               | eyes closed resting<br>TM practice<br>Reaction task                                                                                                                                                                                         | Spectral (Power, $\alpha$ asymmetry)<br>Coherence             | Frontal coherence increased with time during TM practice                                                                                                                                                                                                                                                                                                                                                         |
| Sarang, S. and Telles, S                                                                                                                                   | Changes in p300 following two yoga-based relaxation technique                                                                                                          | 2006 | Cyclic meditation                                  | CDM                               | Eyes closed          | 3 (Fz, Cz, Pz)    | Linked earlobes                                                                                                                                           | 42 (all male)                                                                                | More than 3 months (15.5 months SD 13.3)                                                                                                                                                    | Oddball (recorded before and after meditation or resting state)                                                                                                                                                                             | ERP (Auditory)                                                | Significant decrease in P300 peak latencies and increase in the amplitude post meditation practice compared to pre. During resting state they observed a significant decrease in peak latency but no changes in the amplitude in post compared to pre. Peak latencies were not difference on the pre measurement comparing meditation and resting, but they were significantly different on the post measurement |
| Slagter, Helen A. and Lutz, Antoine and Greischar, Lawrence L. and Francis, Andrew D. and Nieuwenhuis, Sander and Davis, James M. and Davidson, Richard J. | Mental training affects distribution of limited brain resources                                                                                                        | 2007 | Vipassana meditation                               | CDM-OM                            | Eyes open            | 1 (Pz)            | average of both mastoids                                                                                                                                  | 17 practitioners (7 male)<br>23 matched controls (9 males)                                   | 3 months of intensive Vipassana meditation retreat for practitioners. Controls received a 1hr meditation class and were asked to meditate for 20 min daily for 1 week prior to each session | attentional-blink task (pre and post retreat)                                                                                                                                                                                               | ERP (Visual)                                                  | Significant decrease of P3b amplitude for the first stimuli after the retreat for the practitioners. The data was corroborated also with behavioral results. Where intensive mental training was associated with reduction in attentional blink size.<br>ERP was calculated over Pz                                                                                                                              |
| Srinivasan N, Bailjal S                                                                                                                                    | Concentrative meditation enhances preattentive processing: a mismatch negativity study                                                                                 | 2007 | Sudarshan Kriya Yoga                               | CDM-FA                            | NA                   | 64                | NA                                                                                                                                                        | 10 meditators<br>10 non-meditator controls                                                   | 3-7 years                                                                                                                                                                                   | Mismatch negativity<br>Recordings performed before and after each of 3 stages of meditation practice. The first 2 are breathing exercises and the last one is concentrative meditation.<br><br>Controls were asked to relax and read a book | ERP (auditory)                                                | Meditators has larger mismatch negativity (MMN) amplitude than non meditators, with increase after the concentrative meditation.                                                                                                                                                                                                                                                                                 |
| Chan AS, Han YM, Cheung MC                                                                                                                                 | Electroencephalographic (EEG) measurements of mindfulness-based Triarchic body-pathway relaxation technique: a pilot study                                             | 2008 | Triarchic body-pathway relaxation technique (TBRT) | ADM                               | Eyes closed          | 19                | Mean of electrodes                                                                                                                                        | 19 (8 males)                                                                                 | novices                                                                                                                                                                                     | Meditation and Baseline vs Music and Baseline                                                                                                                                                                                               | Spectral (FFT)<br>Source (LORETA)                             | TBRT with greater relative theta power in both anterior and posterior regions of the brain compared with the music condition.<br><br>LORETA: increased theta activity during TBRT was generated by the anterior cingulate cortex<br><br>TBRT and music: both with increases in left-sided anterior activation                                                                                                    |
| Eskandari P, Erfanian A                                                                                                                                    | Improving the performance of brain-computer interface through meditation practicing                                                                                    | 2008 | TM                                                 | NDM                               | Eyes closed          | NA                | Right Earlobe                                                                                                                                             | 10<br>5 meditators<br>5 Control                                                              | about 1 year                                                                                                                                                                                | BCI                                                                                                                                                                                                                                         | ERP (Event Related Spectral Perturbation - ERSF)              | The classification accuracy of the meditation group was 98% against 78% in control group                                                                                                                                                                                                                                                                                                                         |
| Cahn BR, Polich J                                                                                                                                          | Meditation (Vipassana) and the P3a event-related brain potential                                                                                                       | 2008 | Vipassana                                          | CDM-OM                            | Eyes closed          | 19 (only uses 3)  | Balanced linked earlobes                                                                                                                                  | 16 (11 males)                                                                                | 2.5-40<br>Mean: 20                                                                                                                                                                          | Oddball                                                                                                                                                                                                                                     | ERP (auditory)                                                | N1 amplitude decreased in meditation compared to control to distracter stimuli. N1 did not differ for oddball stimuli.<br>P3a amplitude reduce in meditation for distracter.                                                                                                                                                                                                                                     |
| Qin Z, Jin Y, Lin S, Hermanowicz NS                                                                                                                        | A forty-five year follow-up EEG study of Qigong practice                                                                                                               | 2009 | Qigong                                             | CDM-FA                            | Eyes closed          | 19                | Linked earlobes                                                                                                                                           | 3 meditators (all males)<br>6 controls (4 males)                                             | Practitioner 1: since late nineteen-fifties.<br>Practitioner 2: 26 years<br>Practitioner 3: 25 years                                                                                        | Meditation vs resting with closed eyes                                                                                                                                                                                                      | Spectral (FFT)<br>Coherence                                   | Dominant frontal alpha-1 EEG during eyes-closed rest<br><br>Increase in Fronto parietal alpha coherence in meditation                                                                                                                                                                                                                                                                                            |
| Slagter HA, Lutz A, Greischar LL, Nieuwenhuis S, Davidson RJ                                                                                               | Theta phase synchrony and conscious target perception: impact of intensive mental training                                                                             | 2009 | Vipassana                                          | CDM-OM                            | Eyes closed          | 64                | NA                                                                                                                                                        | 17 (7 males)<br>23 (9 males) control                                                         | 3 months retreat                                                                                                                                                                            | Attentional Blink                                                                                                                                                                                                                           | ERP (visual)<br>Synchrony (PLV)                               | Increase in theta phase-locking during target detection and lower P3b amplitude after retreat                                                                                                                                                                                                                                                                                                                    |



| Autors                                                                                                                            | Title                                                                                                        | Year | Meditation                            | Meditation category (ADM,NDM,CDM) | Eyes open or closed?   | Number electrodes | EEG reference                   | Number participants                                                                                                                                                                                                  | Experience                           | Design                                                                                                                                                                                                                                                                                             | Method                                                                     | Result                                                                                                                                                                                                                                                                                                                                                                                                                                                                 |
|-----------------------------------------------------------------------------------------------------------------------------------|--------------------------------------------------------------------------------------------------------------|------|---------------------------------------|-----------------------------------|------------------------|-------------------|---------------------------------|----------------------------------------------------------------------------------------------------------------------------------------------------------------------------------------------------------------------|--------------------------------------|----------------------------------------------------------------------------------------------------------------------------------------------------------------------------------------------------------------------------------------------------------------------------------------------------|----------------------------------------------------------------------------|------------------------------------------------------------------------------------------------------------------------------------------------------------------------------------------------------------------------------------------------------------------------------------------------------------------------------------------------------------------------------------------------------------------------------------------------------------------------|
| Travis F, Haaga DA, Hagelin J, Tanner M, Nidich S, Gaylord-King C, Grosswald S, Rainforth M, Schneider RH                         | Effects of Transcendental Meditation practice on brain functioning and stress reactivity in college students | 2009 | TM                                    | NDM                               | Eyes closed            | 32                | Right/left earlobes average-ear | 50 (13 males)                                                                                                                                                                                                        | 10 weeks                             | Pre-post test                                                                                                                                                                                                                                                                                      | ERP (CNV)<br>Coherence Spectral (FFT)                                      | No P300 difference<br>No significant Alpha/Gamma ratio                                                                                                                                                                                                                                                                                                                                                                                                                 |
| Huang HY, Lo PC                                                                                                                   | EEG dynamics of experienced Zen meditation practitioners probed by complexity index and spectral measure     | 2009 | Zen                                   | CDM- FA                           | Eyes closed            | 30                | Linked mastoids                 | 23 practitioners (6 males)<br>23 control (15 males)                                                                                                                                                                  | 2-12 (mean 8.4) years                | meditation vs rest (meditators) relaxation                                                                                                                                                                                                                                                         | Non-linear (Averaged complexity index)                                     | Increase in frontal alpha and occipital beta<br>Increased Averaged complexity index, correlated to beta activity                                                                                                                                                                                                                                                                                                                                                       |
| Tang YY, Ma Y, Fan Y, Feng H, Wang J, Feng S, Lu Q, Hu B, Lin Y, Li J, Zhang Y, Wang Y, Zhou L, Fan M                             | Central and autonomic nervous system interaction is altered by short-term meditation                         | 2009 | Integrative body-mind training (IBMT) | CDM                               | Eyes closed            | 19                | Average reference               | 86 (42 males)<br><br>Assigned in two groups (experimental and control)<br><br>Only 40 recorded EEG and other physiological measures. The remaining collected SPECT<br><br>34 subjects (17/group) had usable EEG data | 5 days of training, 20 minutes a day | Rest before, during and after 5 days of training<br><br>Control group performed relaxation                                                                                                                                                                                                         | Multimodal (SPECT-acquired in distinct group)<br>Multimodal Spectral (FFT) | Imaging data demonstrated stronger subgenual and adjacent ventral anterior cingulate cortex (ACC) activity in the meditation group.<br><br>Frontal midline ACC theta was correlated with high-frequency HRV, suggesting control by the ACC over parasympathetic activity.                                                                                                                                                                                              |
| Tei S, Faber PL, Lehmann D, Tsujiuchi T, Kumano H, Pascual-Marqui RD, Gianotti LR, Kochi K                                        | Meditators and non-meditators: EEG source imaging during resting                                             | 2009 | Qigong                                | CDM-FA/OM                         | Eyes open/ Eyes closed | 19                | Left ear                        | 8 meditators (3 males)<br>9 control (3 males)                                                                                                                                                                        | 3-30 (mean 11.5)                     | Comparison between resting state of both groups                                                                                                                                                                                                                                                    | Source (Loreta)                                                            | Meditators had significantly stronger delta activity in prefrontal cortex (BAs 9, 10, 11, 44, 45, 46, and 47) and anterior cingulate cortex (BA 32).<br>Meditators had significantly weaker delta activity in motor and somatosensory association cortices (BAs 4, 6, and 7), visual association cortex (BAs 18 and 19), left temporo-parietal junction (BA 22, 39, 40), left precuneus (BA 31), and bilateral fusiform gyrus and right parahippocampal gyrus (BA 30). |
| Subramanya P, Telles S                                                                                                            | Changes in midlatency auditory evoked potentials following two yoga-based relaxation techniques              | 2009 | Cyclic meditation                     | CDM-FA                            | Eyes closed            | 1 (Cz)            | Linked earlobes                 | 47 males                                                                                                                                                                                                             | 6-48 months                          | Response after practice vs Response after rest in supine position                                                                                                                                                                                                                                  | EP (auditory)                                                              | Midlatency<br>Following practice compared to before:<br>Increase in Pa and Nb waves peak latencies<br>Increase peak amplitude of Nb wave<br><br>After rest in supine compared to before:<br>Increase in the peak latency of the Na wave                                                                                                                                                                                                                                |
| Lutz A, Slagter HA, Rawlings NB, Francis AD, Greischar LL, Davidson RJ                                                            | Mental training enhances attentional stability: neural and behavioral evidence                               | 2009 | Vipassana<br>Some training in Metta   | CDM- FA/OM<br>ADM                 | NA                     | 64                | Average of mastoids             | 17 (7 males)<br>23 controls (9 males)                                                                                                                                                                                | 2967+/-3162h                         | baseline -> meditation-><br><br>Attention blink task<br>Dichotic listening task (fucused attention version): attend to tones presented in one ear<br>Dichotic listening task (open attention version): mark deviant tones in either ears<br><br>Tasks performed before and after a 3 month retreat | ERP (Auditory and visual)<br>Synchrony (PLV)                               | Theta band: Phase consistency increase only in response to the target stimulus, that correlated with less variability in the response of the participant.<br><br>Intensified ERP phase consistency in response to any deviant tone within a broad frequency band (1-30 Hz). No changes in ERP amplitude.<br><br>Amplitude differences were noticeable within ERD in the beta band                                                                                      |
| Lagopoulos J, Xu J, Rasmussen I, Vik A, Malhi GS, Eliassen CF, Arntsen IE, Saether JG, Hollup S, Holen A, Davanger S, Ellingsen Ø | Increased theta and alpha EEG activity during nondirective meditation                                        | 2009 | Acem meditation                       | NDM                               | Eyes closed            | 20                | Linked Mastoid                  | 18 (13 males)                                                                                                                                                                                                        | 9-14 years                           | Meditation Vs resting                                                                                                                                                                                                                                                                              | Spectral (FFT)                                                             | Increase in theta and alpha power across all brain regions                                                                                                                                                                                                                                                                                                                                                                                                             |
| Cahn BR, Delorme A, Polich J                                                                                                      | Occipital gamma activation during Vipassana meditation                                                       | 2010 | Vipassana                             | CDM- FA/OM                        | Eyes closed            | 19                | Linked ear lobes                | 16 (11 males)                                                                                                                                                                                                        | 2.5-40 years (mean 20)               | Meditation vs neutral thinking state                                                                                                                                                                                                                                                               | Spectral (FFT)                                                             | Spectral power: delta (decrease in bilateral frontal regions), Theta increase (Fz - midline) gamma (increase in parieto-occipital regions).                                                                                                                                                                                                                                                                                                                            |

| Autors                                                                                                                 | Title                                                                                                                                                                      | Year | Meditation                                                                        | Meditation category (ADM,NDM,CDM) | Eyes open or closed? | Number electrodes                   | EEG reference    | Number participants                                             | Experience                                                                                                                  | Design                                                                                                                                                                                                                                                                                                           | Method                                    | Result                                                                                                                                                                                                                                                                                                                                                                                                                                                                                                                                                                                                       |
|------------------------------------------------------------------------------------------------------------------------|----------------------------------------------------------------------------------------------------------------------------------------------------------------------------|------|-----------------------------------------------------------------------------------|-----------------------------------|----------------------|-------------------------------------|------------------|-----------------------------------------------------------------|-----------------------------------------------------------------------------------------------------------------------------|------------------------------------------------------------------------------------------------------------------------------------------------------------------------------------------------------------------------------------------------------------------------------------------------------------------|-------------------------------------------|--------------------------------------------------------------------------------------------------------------------------------------------------------------------------------------------------------------------------------------------------------------------------------------------------------------------------------------------------------------------------------------------------------------------------------------------------------------------------------------------------------------------------------------------------------------------------------------------------------------|
| Bajjal S, Srinivasan N                                                                                                 | Theta activity and meditative states: spectral changes during concentrative meditation                                                                                     | 2010 | Sahaj Samadhi                                                                     | CDM- FA                           | Eyes Closed          | 64                                  |                  | 20 meditators<br>10 control                                     | 3-7 years                                                                                                                   | Baseline (eyes closed and open): meditators vs non-meditators meditation vs relaxation (eyes closed in both)                                                                                                                                                                                                     | Spectral (FFT) Coherence                  | <p>Spectral data in 16 cortical zones<br/>In meditation separated by 3 blocks: beggingning, middle and end</p> <p>Comparing resting:<br/>Percentage: Higher theta in meditators both sides in frontal central sites and right frontal. Lower theta in meditators in left posterior-occipital. And differences in delta and alpha for main effects.<br/>Absolute power: Lower alpha in meditators</p> <p>Comparing meditation vs relaxation:<br/>Increase in theta during deep meditation (middle block) in frontal areas<br/>Higher coherence in theta for frontal areas in meditators during meditation</p> |
| Kumar S, Nageendra H, Naveen K, Manjunath N, Telles S                                                                  | Brainstem auditory-evoked potentials in two meditative mental states                                                                                                       | 2010 | dharana (focusing on the symbol "OM") and dhyana (effortless single-thought "OM") | CDM- FA/OM                        | Eyes closed          | 1 (Cz)                              | Linked ear lobes | 30 males                                                        | 30 min per day, 4 days in a week, for a minimum of 1 year                                                                   | <p>Two meditation and two control sessions.<br/>Control sessions: (i) ekagrata, i.e. single-topic lecture on meditation and (ii) canalata, i.e. non-targeted thinking.</p> <p>Meditation sessions: (i) dharana, i.e. focusing on the symbol "OM" and (ii) dhyana, i.e. effortless single-thought state "OM".</p> | EP (auditory)                             | <p>Ep: Analyzed wave V</p> <p>The present results showed that the wave V peak latency significantly increased in canalata, ekagrata and dharana, but no change occurred during the dhyana session</p>                                                                                                                                                                                                                                                                                                                                                                                                        |
| Travis F, Haaga DA, Hagelin J, Tanner M, Arenander A, Nidich S, Gayford-King C, Grosswald S, Rainforth M, Schneider RH | A self-referential default brain state: patterns of coherence, power, and eLORETA sources during eyes-closed rest and Transcendental Meditation practice                   | 2010 | TM                                                                                | NDM                               | Eyes closed          | 32                                  | Linked ears      | Experimental group: 19 (5 males)<br>Control group: 19 (4 males) | <p>Novices</p> <p>Experimental group received instructions and were expected to meditate for 20 min a day for 10 weeks.</p> | <p>Randomly divided in two groups: Meditation and Control</p> <p>Both had baseline recordings.</p>                                                                                                                                                                                                               | Spectral (FFT) Coherence Source (eLoreta) | <p>Spectral: higher alpha 1 frontal, lower beta 1 and gamma frontal and parietal in meditation</p> <p>Coherence: higher frontal and parietal alpha 1 coherence; higher frontal and frontal-central interhemispheric coherence</p> <p>eLORETA: Control group compared to Meditation led to greater alpha1 activity in anterior BA33, dorsal (BA24) and posterior (BA30) cortices, in precuneus (BA31) and in left lingual gyrus and parahippocampus (BA18 e 19). Greater beta 2 activity in right lingual gyrus (BA18 e 19)</p>                                                                               |
| Yu X, Fumoto M, Nakatani Y, Sekiyama T, Kikuchi H, Seki Y, Sato-Suzuki I, Arita H.                                     | Activation of the anterior prefrontal cortex and serotonergic system is associated with improvements in mood and EEG changes induced by Zen meditation practice in novices | 2011 | Zen (Tandem)                                                                      | CDM-FA                            | Eyes open            | 3                                   | A1 and A2        | 15 (14 males)                                                   | Novices                                                                                                                     | Baseline -> Meditation -> Rest                                                                                                                                                                                                                                                                                   | Multimodal (NIRS) Spectral (FFT)          | <p>Increased alpha activity and decreased theta activity during and after meditation.</p> <p>NIRS pointed to a marked increase in oxyHb levels in the anterior PFC (BA10 and 9).</p>                                                                                                                                                                                                                                                                                                                                                                                                                         |
| Laakey CE, Berry DR, Sellers EW                                                                                        | Manipulating attention via mindfulness induction improves P300-based brain-computer interface performance                                                                  | 2011 | Mindfulness meditation induction                                                  | CDM- FA                           | Eyes closed          | 16                                  | left mastoid     | 18                                                              | naive                                                                                                                       | 9 subjects did a short meditative mindfulness induction (6min) and 9 were in a non-meditative group. Oddball                                                                                                                                                                                                     | ERP (visual)                              | Larger p300 amplitudes in meditators than in control at Cz and PO7<br>Meditation group reach minimum accuracy faster than control group                                                                                                                                                                                                                                                                                                                                                                                                                                                                      |
| Lavallee CF, Hunter MD, Persinger MA                                                                                   | Intracerebral source generators characterizing concentrative meditation                                                                                                    | 2011 | Concentrative meditation                                                          | CDM- FA                           | Eyes closed          | 19                                  | Ears             | 7 meditators (3 males)<br>7 control (4 males)                   | Average: 4.17 years                                                                                                         | Meditation or relaxation post meditation baseline                                                                                                                                                                                                                                                                | Source (sLoreta)                          | <p>baseline vs meditation:<br/>increase beta1 source at BA33<br/>increase beta3 source at BA 31<br/>decrease gamma at BA40</p> <p>meditation vs relaxation:<br/>decrease Beta1 at BA10<br/>decrease Gamma at BA11 and BA45</p> <p>meditation vs relaxation (controlled for baseline):<br/>increase Beta2 at BA34 and BA 20<br/>increase Beta1 at BA20<br/>increase Beta3 at BA21</p>                                                                                                                                                                                                                         |
| Sobolewski A, Holt E, Kublik E, Wröbel A                                                                               | Impact of meditation on emotional processing—a visual ERP study                                                                                                            | 2011 | Budhist practices                                                                 | CDM-OM                            | NA                   | 8 (Fp1, F3, F4, Fz, Cz, Pz, O1, O2) | Ear lobes        | 13 meditators (7 males)<br>13 controls (5 males)                | 5 years with minimum 5h/week                                                                                                | Neutral, Positive and Negative pictures of IAPS were presented                                                                                                                                                                                                                                                   | ERP (visual)                              | <p>Differences were observed in the late positive potential (LPP). LPP amplitude is typically greater in ERPs evoked by emotionally arousing scenes, specifically negative images, compared to neutral scenes.</p> <p>This effect replicated, but not in case of meditators' frontal scalp regions, who differed significantly in this respect from control subjects.</p>                                                                                                                                                                                                                                    |
| Travis F                                                                                                               | Comparison of coherence, amplitude, and eLORETA patterns during Transcendental Meditation and TM-Sidhi practice                                                            | 2011 | TM                                                                                | NDM                               | Eyes Closed          | 32                                  | Ears lobes       | 26 (12 males)                                                   | average 25.6 year TM and 19.4 years TM Sidhi                                                                                | <p>TM group: 2 sessions of TM</p> <p>TM Sidhi group: 1 section of TM followed by another of TM Sidhi</p>                                                                                                                                                                                                         | Spectral (FFT) Coherence Source (eLoreta) | <p>Spectral Analysis in grouped frontal and parietal (7 electrodes each group): Interaction in frontal alpha1 and frontal beta1 amplitudes, but no significant differences between groups.<br/>Coherence: No interaction</p> <p>eLoreta: higher source for TM-Sidhi for alpha1 at BA19, BA18, BA 37, BA20 and BA21</p>                                                                                                                                                                                                                                                                                       |
| Radin DI, Vieten C, Michel L, Delorme A                                                                                | Electrocortical activity prior to unpredictable stimuli in meditators and nonmeditators                                                                                    | 2011 | Nondual meditation                                                                | NDM                               | Eyes closed          | 32                                  | vertex           | 8 meditators<br>8 controls                                      | minimum of 3000 hours                                                                                                       | <p>2 tasks (Each one doing during meditation or not), with 5 min rest between each run</p> <p>1) Participants can hear a sound, see a flash, both or nothing and press a button to begin</p> <p>2) Participants can hear a sound or see a flash, pressing the button at sound stimulus</p>                       | ERP (auditory and visual)                 | <p>Post-Stimulus shown different patterns for audio and light stimuli in both groups</p> <p>Prestimulus: no difference between audio and flash in non meditators;</p> <p>In 5 electrodes there was a difference prior to light versus audio stimuli, mostly over occipital region, with main difference occurring at the free-running task.</p>                                                                                                                                                                                                                                                              |

| Autors                                                         | Title                                                                                                                                      | Year | Meditation                                                                                                            | Meditation category (ADM,NDM,CDM) | Eyes open or closed?                               | Number electrodes               | EEG reference     | Number participants                                                                                                                                  | Experience                                                                                                                                                                              | Design                                                                                                                                                          | Method                                                                | Result                                                                                                                                                                                                                                                                                                                                                                                                                                                                                                                                                                                                                                                                                                                                                                                                                                                                                                                   |
|----------------------------------------------------------------|--------------------------------------------------------------------------------------------------------------------------------------------|------|-----------------------------------------------------------------------------------------------------------------------|-----------------------------------|----------------------------------------------------|---------------------------------|-------------------|------------------------------------------------------------------------------------------------------------------------------------------------------|-----------------------------------------------------------------------------------------------------------------------------------------------------------------------------------------|-----------------------------------------------------------------------------------------------------------------------------------------------------------------|-----------------------------------------------------------------------|--------------------------------------------------------------------------------------------------------------------------------------------------------------------------------------------------------------------------------------------------------------------------------------------------------------------------------------------------------------------------------------------------------------------------------------------------------------------------------------------------------------------------------------------------------------------------------------------------------------------------------------------------------------------------------------------------------------------------------------------------------------------------------------------------------------------------------------------------------------------------------------------------------------------------|
| Ren J, Huang Z, Luo J, Wei G, Ying X, Ding Z, Wu Y, Luo F      | Meditation promotes insightful problem-solving by keeping people in a mindful and alert conscious state                                    | 2011 | Susoku                                                                                                                | CDM-FA                            | "Slightly closed"                                  | 2 (bilateral prefrontal cortex) | A1 and A2         | 48 (23 males) in 3 groups of 16 each                                                                                                                 | Naive                                                                                                                                                                                   | Pre-test: 10 insight problems<br>Test: Meditation (counting breaths - 10 or 100) or Auditory judgment task<br>Post-test: insight problems not solve at pre-test | Spectral (Wavelets)                                                   | A one-way within-groups ANOVA showed a significant difference in the percentage of alpha waves among the three groups.                                                                                                                                                                                                                                                                                                                                                                                                                                                                                                                                                                                                                                                                                                                                                                                                   |
| Hinterberger T, Kamei T, Walach H                              | Psychophysiological classification and staging of mental states during meditative practice                                                 | 2011 | Zen, Qi-Gong, Sahaja Yoga, Western contemplative methods, and spiritist or mediumistic                                | CDM-FA NDM                        | Differs according to meditation practice           | 62                              | shoulder          | 49                                                                                                                                                   | 31 > 1000h<br>11 <40                                                                                                                                                                    | 1-baseline (eyes open, eyes closed, reading book or computer screen)<br>2- meditation session<br>3- guided meditation (4 different meditations)                 | Linear classifier                                                     | Classification among 7 possible states (3 resting and 4 guided meditation)<br>About 83% of epochs correctly classified. The personal meditation of each mediator was not included.                                                                                                                                                                                                                                                                                                                                                                                                                                                                                                                                                                                                                                                                                                                                       |
| Moore A, Gruber J, Deroose J, Malinowski P                     | Regular, brief mindfulness meditation practice improves electrophysiological markers of attentional control                                | 2012 | Mindfulness                                                                                                           | CDM-FA                            | Eyes Open                                          | 64                              | Average reference | Meditation Group: 12<br>Control Group: 16                                                                                                            | All started meditation naive. Meditation group received instruction and was advised to practice for at least 10 minutes a day for 16 weeks                                              | Stroop Task performed at beginning after a 2 hour mindfulness training (T1), after 8-10 weeks (T2) and at the end (T3)                                          | ERP (Stroop) Source (VARETA)                                          | Meditators had increase of lateral posterior N2 amplitudes over both hemispheres, irrespective of stimulus congruency.<br><br>Neural sources (VARETA) of N2: increased activity in the left medial and lateral occipitotemporal areas for congruent stimuli, contrasted by decreased activity in similar brain areas in the control group.<br><br>Changes of the P3 for incongruent stimuli. Control group exhibited an increase of the P3 amplitude and a decrease was observed for the meditation group. The P3 decrease in electrode space was accompanied by significantly decreased signal strength in source space, which comprised lateral occipitotemporal and inferior temporal regions of the right hemisphere.                                                                                                                                                                                                |
| Lehmann D, Faber PL, Tei S, Pascual-Marqui RD, Milz P, Kochi K | Reduced functional connectivity between cortical sources in five meditation traditions detected with lagged coherence using EEG tomography | 2012 | Tibetan Buddhists<br>QiGong<br>Sahaja Yoga<br>Ananda Marga<br>Zen                                                     | NDM                               | Eyes closed/ half closed                           | 19                              | NA                | Tibetan Buddhists (13)<br>QiGong (15)<br>Sahaja Yoga (14)<br>Ananda Marga (14)<br>Zen (15)                                                           | Tibetan Buddhists (1-25; mean 12.2 years)<br>QiGong (2-13; mean 6.6 years)<br>Sahaja Yoga (1-20; mean 6.5 years)<br>Ananda Marga (5-33; mean 16.9 years)<br>Zen (5-21; mean 12.3 years) | Initial Resting<br>Meditation<br>Final resting                                                                                                                  | Spectral (FFT)<br>Coherence (Loreta-based lagged/Classical coherence) | Lagged coherence was always lower in meditation than in initial or final rest. Classical coherence also show predominantly lower coherence in meditation.<br><br>Power spectra among the 5 groups differed among them.                                                                                                                                                                                                                                                                                                                                                                                                                                                                                                                                                                                                                                                                                                   |
| van Leeuwen S, Singer W, Melloni L                             | Meditation increases the depth of information processing and improves the allocation of attention in space                                 | 2012 | Buddhist meditation                                                                                                   | CDM- FA/OM                        | Eyes open                                          | 129                             | Vertex            | Cross-sectional EEG study.:<br>8 monks (5 males)<br>8 novices (5 males)<br><br>Longitudinal study:<br>6 meditators (2 males)<br>6 controls (2 males) | Cross-sectional EEG study.:<br>mean 5 years<br><br>Longitudinal study (4-day retreat):<br>mean 3 years                                                                                  | Navon<br>A large number (global) formed by small numbers (local). With 1 and 2 as targets and 3 and 4 as distractors                                            | ERP (Visual) Source (MSP)                                             | Differences in longitudinal was provided in the RT, for EEG data only says about meditators vs control group.<br><br>ERP:<br>P1 amplitude was higher for local than global at left hemisphere in control group and in both hemispheres for meditation group.<br>N1 amplitude was higher in global than local at right hemisphere for meditators, but not found hierarchical selection in both hemispheres of control group.<br>N2 amplitude was higher for global than local in right hemisphere and opposite in left hemisphere. In control group no hierarchical processing found in either hemisphere.<br>P3 was higher for global than local in both groups.<br><br>Source<br>250-400ms<br>bilateral clusters in temporal, occipital, and frontal regions, corresponding to the inferior temporal gyrus, inferior occipital/fusiform gyrus and DLPFC activation in the meditation group but not in the control group |
| Ravnik-Glavač M, Hrašovec S, Bon J, Drejo J, Glavač D.         | Genome-wide expression changes in a higher state of consciousness                                                                          | 2012 | First practitioner: Zen and Kundalini meditation<br>Second practitioner: mental quietness and visualization of Buddha | CDM- FA                           | Meditator 1: Eyes open<br>Meditator 2: Eyes closed | 128                             | Average reference | 2                                                                                                                                                    | 1: 23 years<br>2: 25 years                                                                                                                                                              | EEG was recorded during rest and meditation                                                                                                                     | Genome Spectral (Complex Demodulation)                                | Meditator 1: Power increased in theta and alpha in continuous manner during meditation, mainly in parieto-occipital and frontal or fronto-central regions. Power changes in alpha 1 (8-10 Hz) were most consistent with the time course of meditation<br><br>Meditator 2: Power increased in theta and alpha in continuous manner during meditation, mainly in occipital regions. Power changes in alpha 1 were consistent with the time course of meditation.                                                                                                                                                                                                                                                                                                                                                                                                                                                           |

| Autors                                                                                                                                                                               | Title                                                                                                                        | Year | Meditation                                                                                                                      | Meditation category (ADM,NDM,CDM) | Eyes open or closed? | Number electrodes               | EEG reference       | Number participants                                                              | Experience                                                               | Design                                                                                                                                                                                                                                                                                                                                                                                                                                                | Method                                                                               | Result                                                                                                                                                                                                                                                                                                                                                                                                                                                                                                                                                                                        |
|--------------------------------------------------------------------------------------------------------------------------------------------------------------------------------------|------------------------------------------------------------------------------------------------------------------------------|------|---------------------------------------------------------------------------------------------------------------------------------|-----------------------------------|----------------------|---------------------------------|---------------------|----------------------------------------------------------------------------------|--------------------------------------------------------------------------|-------------------------------------------------------------------------------------------------------------------------------------------------------------------------------------------------------------------------------------------------------------------------------------------------------------------------------------------------------------------------------------------------------------------------------------------------------|--------------------------------------------------------------------------------------|-----------------------------------------------------------------------------------------------------------------------------------------------------------------------------------------------------------------------------------------------------------------------------------------------------------------------------------------------------------------------------------------------------------------------------------------------------------------------------------------------------------------------------------------------------------------------------------------------|
| Telles S, Raghavendra BR, Naveen KV, Manjunath NK, Subramanya P                                                                                                                      | Mid-latency auditory evoked potentials in 2 meditative states                                                                | 2012 | meditative focusing and meditation based on specific instructions. Participants with prior experience with Sanskrit syllable OM | CDM                               | Eyes closed          | 4 (Cz, FPz and earlobes)        | Earlobes            | 60                                                                               | Minimum of 6 months mean (20.95 +/- 14.21 months)                        | Components of the Mid-latency auditory evoked potentials (MLAEPs) measured in 4 different mental states:<br>1- meditative focusing<br>2- meditative de-focusing or effortless meditation (meditative)<br>3- random thinking<br>4- nonmeditative focusing (nonmeditative) sessions.<br><br>The participants were randomly assigned to the meditative or nonmeditative sessions. Each session was divided into: pre sessions, session and post session. | EP (Auditory)                                                                        | Analyzed peak latency and amplitude of the MLAEPs components (Na, Pa, Nb) compared pre, during and post portion of one session<br><br>Peak latency increase in Na and Pa during meditation and Nb on nonmeditation comparing post-session vs pre-session.<br><br>Peak amplitude decrease in Pa during meditative and nonmeditative sessions compared to respective pre-sessions                                                                                                                                                                                                               |
| Saggar M, King BG, Zanesco AP, Maclean KA, Alchele SR, Jacobs TL, Bridwell DA, Shaver PR, Rosenberg EL, Sahdra BK, Ferrer E, Tang AC, Mangun GR, Wallace BA, Mikkilainen R, Saron CD | Intensive training induces longitudinal changes in meditation state-related EEG oscillatory activity                         | 2012 | Focused attention meditation techniques                                                                                         | CDM-FA                            | Eyes closed          | 88-channel equidistant montage. | Average of channels | 22: initial retreat (10 males)<br>22: control group (11 males)                   | Retreat: M = 2855.6 h, SD = 2994.1<br>Control: M = 2272.7 h, SD = 2326.3 | Acquisition during practice at three assessment points during the retreat:<br>- beginning (pre)<br>- Middle (mid)<br>- End (post)                                                                                                                                                                                                                                                                                                                     | Spectral (IAF)                                                                       | Replicable and robust reductions in beta-band power over central-parietal regions and decreased IAF following three months of intensive FA meditation.                                                                                                                                                                                                                                                                                                                                                                                                                                        |
| Goshvarpour A, Goshvarpour A, Rahati S, Saadatian V                                                                                                                                  | Bispectrum estimation of electroencephalogram signals during meditation                                                      | 2012 | Sit quietly focusing on the breath                                                                                              | CDM-FA                            | Eyes closed          | 3 (Fz, Cz, Pz)                  | Linked ear lobes    | Guided: 11 experienced, 4 novices<br>Unguided: 10 experienced<br><br>all females | Guided: experienced (5 to 7 years)<br>Unguided: mean 7 years             | Before and during meditation in guided and unguided practice                                                                                                                                                                                                                                                                                                                                                                                          | Synchrony (Bispectrum estimation)                                                    | The maximum value of the magnitudes of bispectrum (power) is increased during meditation. The mean Bispectrum magnitude of each channel is increased during meditation.<br><br>Increments of phase coupling are more obvious in occipital region (Pz) than frontal and central regions (Fz and Cz). Besides that phase-coupled harmonics are shifted to the higher frequencies during meditation.                                                                                                                                                                                             |
| Park YJ, Park YB                                                                                                                                                                     | Clinical utility of paced breathing as a concentration meditation practice                                                   | 2012 | Paced breathing (PB)                                                                                                            | CDM                               | Eyes closed          | 6 (F3, F4, T3, T4, P3, P4)      | NA                  | 58                                                                               | naive participants                                                       | The experiment consisted answering a short version of the Temperament Character Inventory (TCI-RS) followed by the session: resting and successive spontaneous breathing; vs paced breathing (following auditory cues)<br><br>The authors summed the score of each subscale for the TCI-RS to examine which subscales among the seven subscales were indicative of the percent changes in heart rate variability (HRV) and EEG parameters during PB.  | Spectral (FFT)                                                                       | Increased alpha power and local decreases in theta power during PB.<br><br>Authors also suggests that personality traits mediate neurophysiological changes more prominently during PB than do autonomic changes.                                                                                                                                                                                                                                                                                                                                                                             |
| Ahani A, Wahbeh H, Miller M, Nezamfar H, Erdogan D, Oken B                                                                                                                           | Change in physiological signals during mindfulness meditation                                                                | 2013 | Mindfulness meditation                                                                                                          | CDM-FA                            | Eyes closed          | 32                              | NA                  | 34                                                                               | naive                                                                    | 6 week intervention<br>Listening 15 min podcast eyes closed<br>Meditation 15 min                                                                                                                                                                                                                                                                                                                                                                      | Spectral (PSD)<br>Classification(SVM)                                                | Spectral<br>Increase in alpha, beta and theta during meditation<br><br>SVM<br>70% accuracy using EEG<br>80% using EEG+respiration                                                                                                                                                                                                                                                                                                                                                                                                                                                             |
| Teper R, Inzlicht M                                                                                                                                                                  | Meditation, mindfulness and executive control: the importance of emotional acceptance and brain-based performance monitoring | 2013 | various meditation backgrounds (i.e. Vipassana, Shambhala, concentrative, etc).                                                 | CDM                               | NA                   | 32                              | Average ears        | 20 meditators (9 males)<br>18 non-meditators (2 males)                           | at least one year (mean 3.19)                                            | Stroop task<br><br>Analysis of error-related negativity (ERN), a neurophysiological response that occurs within 100 ms of error commission in FCz while the error positivity (Pe) was defined as the maximum peak between 150 and 250 ms postkey press at FCz electrode.                                                                                                                                                                              | ERP (Stroop)                                                                         | Meditators showed a higher ERN and had fewer errors.<br><br>Meditators do not exhibit stronger Pe's.                                                                                                                                                                                                                                                                                                                                                                                                                                                                                          |
| Cahn BR, Delorme A, Polich J                                                                                                                                                         | Event-related delta, theta, alpha and gamma correlates to auditory oddball processing during Vipassana meditation            | 2013 | Vipassana                                                                                                                       | CDM- FA/OM                        | Eyes closed          | 19                              | Linked ear lobes    | 16 (11 males)                                                                    | 2.5-40 years (M=20, SD=12.1)                                             | Meditation vs mind wandering<br><br>Auditory oddball                                                                                                                                                                                                                                                                                                                                                                                                  | ERP (Auditory)<br>Spectral (Wavelets-Morlet)<br>Coherence (complex Gaussian wavelet) | Decreased evoked delta power to distracter stimuli concomitantly with a greater ER reduction of late (500–900 ms) alpha-1 (8–10 Hz) activity<br><br>Standard stimuli : increased early ER alpha phase synchrony (inter-trial coherence) and evoked theta phase synchrony<br><br>During meditation: greater differential early-evoked gamma power to the different stimulus classes. Correlation analysis indicated that this effect stemmed from a meditation state-related increase in early distracter-evoked gamma power and phase synchrony specific to longer-term expert practitioners. |

| Autors                                                                             | Title                                                                                                                           | Year | Meditation                                                                                                                                                                                                                                  | Meditation category (ADM,NDM,CDM) | Eyes open or closed? | Number electrodes                                                 | EEG reference                                   | Number participants                                                                     | Experience                                                                                                                                                                                                                                                                                                                                                                                                                                                                                                                                              | Design                                                                                                                                                                                                                                                                                                                                                              | Method                                                               | Result                                                                                                                                                                                                                                                                                                                                                                                                                                                                                                                                                                             |
|------------------------------------------------------------------------------------|---------------------------------------------------------------------------------------------------------------------------------|------|---------------------------------------------------------------------------------------------------------------------------------------------------------------------------------------------------------------------------------------------|-----------------------------------|----------------------|-------------------------------------------------------------------|-------------------------------------------------|-----------------------------------------------------------------------------------------|---------------------------------------------------------------------------------------------------------------------------------------------------------------------------------------------------------------------------------------------------------------------------------------------------------------------------------------------------------------------------------------------------------------------------------------------------------------------------------------------------------------------------------------------------------|---------------------------------------------------------------------------------------------------------------------------------------------------------------------------------------------------------------------------------------------------------------------------------------------------------------------------------------------------------------------|----------------------------------------------------------------------|------------------------------------------------------------------------------------------------------------------------------------------------------------------------------------------------------------------------------------------------------------------------------------------------------------------------------------------------------------------------------------------------------------------------------------------------------------------------------------------------------------------------------------------------------------------------------------|
| Tsai JF, Jou SH, Cho W, Lin CM                                                     | Electroencephalography when meditation advances: a case-based time-series analysis                                              | 2013 | Breath meditation disappearance of self-boundaries, blissful feeling, and complete quiescence during meditation.                                                                                                                            | CDM/FA NDM                        | Eyes closed          | 3 (Fp1, Fp2, Oz)                                                  | Left activity: Fp1-Oz<br>Right activity: Fp2-Oz | 1                                                                                       | 2 years                                                                                                                                                                                                                                                                                                                                                                                                                                                                                                                                                 | Rest X ordinary meditation X advanced meditation                                                                                                                                                                                                                                                                                                                    | Spectral (FFT)                                                       | Meditation X baseline: higher activities compared with baseline were found only in bilateral theta, but not in alpha bands.<br><br>Advanced meditation X breath meditation: increased activities were found both in bilateral alpha and theta bands compared against breath meditation.<br><br>Advanced meditation X baseline: bilateral alpha and theta bands revealed significantly increased activities.                                                                                                                                                                        |
| Hagerty MR, Isaacs J, Brasington L, Shupe L, Fetz EE, Cramer SC                    | Case study of ecstatic meditation: fMRI and EEG evidence of self-stimulating a reward system                                    | 2013 | Ecstatic meditations - jhanas                                                                                                                                                                                                               | CDM-FA                            | NA                   | 256                                                               | Vertex (Cz)                                     | 1                                                                                       | 17 years                                                                                                                                                                                                                                                                                                                                                                                                                                                                                                                                                | Recordings of each sequential jhana state, marked by the participant                                                                                                                                                                                                                                                                                                | Multimodal (fMRI - not simultaneous)<br>Spectral (FFT)               | EEG signal shifted to the lower-power bands of theta and alpha1<br><br>The fMRI show changes in brain activity in 11 regions shown to be associated with the subjective reports, and these changes occur promptly after jhana is entered.                                                                                                                                                                                                                                                                                                                                          |
| Moynihan JA, Chapman BP, Klorman R, Krasner MS, Duberstein PR, Brown KW, Talbot NL | Mindfulness-based stress reduction for older adults: effects on executive function, frontal alpha asymmetry and immune function | 2013 | MBSR                                                                                                                                                                                                                                        | CDM                               | Eyes open and closed | 19 (FP1/2, F3/4, F7/8, C3/4, T7/8, P7/8, P3/4; O1/2, Fz, Cz, Pz ) | Digitally derived linked-mastoids               | 110                                                                                     | naive                                                                                                                                                                                                                                                                                                                                                                                                                                                                                                                                                   | Participants were randomly divided into two groups: MBSR and wait list<br><br>EEG recorded prior to the start of the program, 8 weeks later just after program completion and also 32 weeks after the first recording.                                                                                                                                              | Spectral (FFT, $\alpha$ asymmetry)                                   | Leftward alpha asymmetry at F3/4 was reported to be significantly greater in the MBSR group when compared to waiting list immediately after the completion of the MBSR program. MBSR participants exhibit a relatively constant alpha asymmetry and waiting list participants a significant rightward shift in alpha asymmetry                                                                                                                                                                                                                                                     |
| Delgado-Pastor LC, Perakakis P, Subramanya P, Telles S, Vila J                     | Mindfulness (Vipassana) meditation: effects on P3b event-related potential and heart rate variability                           | 2013 | Vipassana                                                                                                                                                                                                                                   | CDM- FA/OM                        | Eyes closed          | 3                                                                 | interconnected earlobes                         | 10 (all male)                                                                           | Min 2 years<br>Average 7.5                                                                                                                                                                                                                                                                                                                                                                                                                                                                                                                              | 5 min resting pre-intervention oddball task<br>30 min meditation/random thinking<br>Post-intervention oddball                                                                                                                                                                                                                                                       | ERP (auditory)                                                       | Larger P300 after meditation than before meditation and after random thinking.                                                                                                                                                                                                                                                                                                                                                                                                                                                                                                     |
| Berkovich-Ohana A, Glicksohn J, Goldstein A                                        | Studying the default mode and its mindfulness-induced changes using EEG functional connectivity                                 | 2013 | Theravada                                                                                                                                                                                                                                   | CDM- FA/OM                        | Eyes closed          | 64                                                                | Cz                                              | 48 (3 meditation group with 12 participants each + control group)                       | Short ~90h (12 participants)<br>Intermediate ~2570h (12 participants)<br>Long-term ~7500h (12 participants)                                                                                                                                                                                                                                                                                                                                                                                                                                             | Resting state, a time producing task and meditation                                                                                                                                                                                                                                                                                                                 | Synchrony (Mean phase coherence - MPC)                               | Increased alpha MPC in left hemisphere                                                                                                                                                                                                                                                                                                                                                                                                                                                                                                                                             |
| Kim DK, Lee KM, Kim J, Whang MC, Kang SW                                           | Dynamic correlations between heart and brain rhythm during Autogenic meditation                                                 | 2013 | Autogenic meditation                                                                                                                                                                                                                        | CDM-FA                            | Eyes closed          | 19                                                                | Linked ear lobes                                | 13 (6 males)                                                                            | Completed 8 weeks autogenic meditation course and have daily meditated for at least 1 month (Mean $\pm$ SD = $0.8 \pm 0.5$ years, range = $0.1-2.0$ years)                                                                                                                                                                                                                                                                                                                                                                                              | Baseline vs meditation                                                                                                                                                                                                                                                                                                                                              | Spectral (FFT)<br>Coherence (Lagged Coherence)<br>Multimodal         | Alpha power averaged over all channels increased during meditation<br><br>Alpha band coherence averaged over all channels increased during meditation                                                                                                                                                                                                                                                                                                                                                                                                                              |
| Tan LF, Dienes Z, Jansari A, Goh SY                                                | Effect of mindfulness meditation on brain-computer interface performance                                                        | 2014 | Mindfulness                                                                                                                                                                                                                                 | CDM - FA                          | Eyes-closed          | 64                                                                | NA                                              | 76<br>20 meditation training<br>20 music training                                       | 12 weeks                                                                                                                                                                                                                                                                                                                                                                                                                                                                                                                                                | Meditation learning group<br>Guitar learning group<br>Control group                                                                                                                                                                                                                                                                                                 | BCI                                                                  | Meditation group has a higher accuracy than guitar learning group and control group                                                                                                                                                                                                                                                                                                                                                                                                                                                                                                |
| Xue SW, Tang YY, Tang R, Posner MI                                                 | Short-term meditation induces changes in brain resting EEG theta networks                                                       | 2014 | Integrative Body-Mind Training                                                                                                                                                                                                              | CDM - FA                          | Eyes-closed          | 28                                                                | FCz                                             | 45 (29 males)                                                                           | 24 Meditation Group<br>21 Relaxation group                                                                                                                                                                                                                                                                                                                                                                                                                                                                                                              | 1 week of meditation/relaxation training (30 min; 3.5h in total)                                                                                                                                                                                                                                                                                                    | Graph Theory (Functional connectivity by synchronization likelihood) | Decreased average path length and increased clustering coefficient in Meditation group after training, not shown in relaxation group.                                                                                                                                                                                                                                                                                                                                                                                                                                              |
| Hinterberger T, Schmidt S, Kamei T, Walach H                                       | Decreased electrophysiological activity represents the conscious state of emptiness in meditation                               | 2014 | different kinds of spiritual traditions such as Zen-Buddhism (11), Qi-Gong (4), Tibetan Buddhism (4), Sahaja Yoga (8), Western contemplative methods (7), spiritists or mediumistic practice (5), or were spiritual healers or shamans (3). | CDM- FA/OM                        | Eyes closed/open     | 64                                                                | Common average                                  | Meditation specific states: 30 (19 males)<br><br>Influence of meditation experience: 50 | Meditation specific states: more than 5 year or 1000 hours (mean 6498 h)<br><br>Influence of meditation experience 3 equal sized subgroups: For the between-group analyses, the group of 17 most experienced meditators (MEM) was compared to the group of 17 least experienced meditators (LEM), the intermediate group was omitted. The 17 LEM (13 males) had less than 500 h of meditation practice (mean practice of 111 h and 3.4 years); the 17 MEM (12 males) had at least 3800 h of meditation practice (mean practice of 9716 h and 27 years). | Baseline session: eyes opened, eyes closed, silently reading a text from a book or a computer screen.<br><br>Meditation session: meditate in their own usual way (idiosyncratic). Controls received instructions to focus on the breath<br><br>Guided meditation session: Presence/Monitoring, Thoughtless emptiness (TE), Focused attention, Spatial connectedness | Multimodal<br><br>Spectral (IAF)                                     | 30 experienced meditators:<br>Normal resting is associated with increased delta and theta waves compared to meditative states (idiosyncratic meditation, presence/monitoring, and TE). Furthermore, compared to resting, presence/monitoring had an increased alpha activity and beta 1 a lower activity in idiosyncratic meditation and TE<br><br>MEM vs LEM:<br>IAF difference between groups small and not significant<br><br>Only MEM showed significant delta and theta power during idiosyncratic meditation compared to resting. The MEM also have decreased power in beta1 |
| Kim DK, Rhee JH, Kang SW                                                           | Reorganization of the brain and heart rhythm during autogenic meditation                                                        | 2014 | Autogenic meditation                                                                                                                                                                                                                        | CDM-FA                            | Eyes closed          | 19                                                                | Earlobes                                        | 14                                                                                      | Completed 8 weeks autogenic meditation course and have daily meditated for at least 1 month (Mean $\pm$ SD = $0.8 \pm 0.5$ years, range = $0.1-2.0$ years)                                                                                                                                                                                                                                                                                                                                                                                              | Baseline followed by flexible time of meditation all with eyes closed. Compare baseline vs meditation                                                                                                                                                                                                                                                               | Spectral (FFT)<br>Coherence                                          | EEG Power: Significant decreases in the delta and near significant decreases in the high beta band absolute power during meditation compared to the baseline<br><br>EEG Coherence: Significant increases in the alpha, beta, high beta, gamma, and the high gamma band coherence averaged over 171 channel combinations during meditation compared to the baseline.                                                                                                                                                                                                                |

| Autors                                                                                   | Title                                                                                                                                                               | Year | Meditation                           | Meditation category (ADM,NDM,CDM) | Eyes open or closed?                        | Number electrodes   | EEG reference      | Number participants                           | Experience                                                                                                               | Design                                                                                                                                                                                                                                                        | Method                                                                               | Result                                                                                                                                                                                                                                                                                                                                                                                                                                                                                                                                                                                                                                                                                                                                                                                                                                                                                                                                                                                    |
|------------------------------------------------------------------------------------------|---------------------------------------------------------------------------------------------------------------------------------------------------------------------|------|--------------------------------------|-----------------------------------|---------------------------------------------|---------------------|--------------------|-----------------------------------------------|--------------------------------------------------------------------------------------------------------------------------|---------------------------------------------------------------------------------------------------------------------------------------------------------------------------------------------------------------------------------------------------------------|--------------------------------------------------------------------------------------|-------------------------------------------------------------------------------------------------------------------------------------------------------------------------------------------------------------------------------------------------------------------------------------------------------------------------------------------------------------------------------------------------------------------------------------------------------------------------------------------------------------------------------------------------------------------------------------------------------------------------------------------------------------------------------------------------------------------------------------------------------------------------------------------------------------------------------------------------------------------------------------------------------------------------------------------------------------------------------------------|
| Ahani A, Wabbeh H, Nezamfar H, Miller M, Erdogmus D, Oken B                              | Quantitative change of EEG and respiration signals during mindfulness meditation                                                                                    | 2014 | Mindfulness                          | CDM - FA                          | Eyes closed                                 | 32                  | Cz                 | 34 (6 males)                                  | 6-week                                                                                                                   | Listening podcast (Eyes-closed)<br>Guided meditation (Eyes-closed)                                                                                                                                                                                            | Power Spectral Density<br>Synchrony (PLV)<br>Classification (Support Vector Machine) | <p>PSD:<br/>Increase in all regions for Beta and theta only not at frontal region. Increase in Occipital and Right temporal alpha.</p> <p>PLV:<br/>Increase in number of pairs of electrodes with higher PLV than threshold in Theta, Alpha and Beta</p> <p>SVM:<br/>EEG only was able to differentiate between meditation and non-meditation, however with addition of respiratory feature was even better.</p>                                                                                                                                                                                                                                                                                                                                                                                                                                                                                                                                                                          |
| Milz P, Faber PL, Lehmann D, Kochi K, Pascual-Marqui RD                                  | sLORETA intracortical lagged coherence during breath counting in meditation-naïve participants                                                                      | 2014 | Breath counting                      | CDM - FA                          | Eyes closed                                 | 58                  | Cz                 | 23 (all males)                                | Naïve                                                                                                                    | 3 Resting vs 2 breath counting                                                                                                                                                                                                                                | Spectral (FFT)<br>Source (sLoreta)<br>Coherence in Loreta sources                    | <p>FFT: Only alpha1 at F1 was higher in meditation than resting.<br/>Loreta Source: No statistical difference after correction for multiple tests.<br/>Loreta Coherence: Lower lagged coherence with left BA10 and right BAs 3, 10, 17, 40.<br/>Conventional coherence: Higher coherence at 17 pairs and lower at 7 pairs.</p>                                                                                                                                                                                                                                                                                                                                                                                                                                                                                                                                                                                                                                                            |
| Kopal J, Vyšata O, Burián J, Schätz M, Procházka A, Vališ M                              | Complex continuous wavelet coherence for EEG microstates detection in insight and calm meditation                                                                   | 2014 | Vipassana                            | CDM- FA/OM                        | NA                                          | 19                  | linked earlobes    | meditors 7 (all males)<br>control 7 (6 males) | > 1000h                                                                                                                  | Calm meditation (30 min)<br>Insight meditation (30 min)                                                                                                                                                                                                       | Coherence (Complex continuous wavelet -Morlet)                                       | Real parts of wavelet coherence in frontal regions and imaginary part in frontal-occipital pairs of electrodes shown higher accuracy for differentiate between groups.                                                                                                                                                                                                                                                                                                                                                                                                                                                                                                                                                                                                                                                                                                                                                                                                                    |
| Jo HG, Wittmann M, Hinterberger T, Schmidt S                                             | The readiness potential reflects intentional binding                                                                                                                | 2014 | Mindfulness                          | CDM                               | Measurement not performed during meditation | 64                  | linked mastoids    | 20 meditators<br>20 matched controls          | Meditators had least 3 years of regular mindfulness meditation                                                           | Intentional binding paradigm (attentional paradigm).<br>Interested in the behavior of meditators vs non meditators                                                                                                                                            | ERP (readiness potential)                                                            | No significant difference between meditators and control in behavioral and EEG responses.                                                                                                                                                                                                                                                                                                                                                                                                                                                                                                                                                                                                                                                                                                                                                                                                                                                                                                 |
| Thomas J, Jamieson G, Cohen M                                                            | Low and then high frequency oscillations of distinct right cortical networks are progressively enhanced by medium and long term Satyananda Yoga meditation practice | 2014 | Satyananda Yoga meditation           | NDM                               | Eyes closed                                 | 25                  | Left mastoid       | 12                                            | 6 intermediate practitioners (mean 4 years)<br>6 experienced practitioners (mean 30 years)                               | The EEG was recorded during the following conditions: body-steadiness meditation, mantra meditation, and non-meditation mental calculation condition.                                                                                                         | Source analysis (eLoreta)                                                            | <p>Intermediate meditators exhibit greater activity particularly in alpha1 and theta during mental calculation, body-steadiness and mantra meditation. The number of significant voxels was double in these conditions; These differences were greatest in right (R) superior frontal and R precentral gyrus and extended back to include the R parietal and occipital lobes.</p> <p>Advanced Yoga meditators showed greater activity in high frequencies (beta and especially gamma) in all conditions but greatly expanded during meditation practice.</p> <p>Across all conditions (meditation and non-meditation) differences were greatest in the same regions: R insula, R inferior frontal gyrus and R anterior temporal lobe. Distinct R core networks were identified in alpha1 (8–10 Hz) and gamma (25–42 Hz) bands, respectively. The voxels recruited to these networks greatly expanded during meditation practice to include homologous regions of the left hemisphere.</p> |
| Reva NV, Pavlov SV, Loktev KV, Korenyok VV, Afanas LI                                    | Influence of long-term Sahaja Yoga meditation practice on emotional processing in the brain: An ERP study                                                           | 2014 | Sahaja Yoga meditation               | CDM                               | Recording was not during meditation         | recorded 62 used 25 | NA                 | 40 (all males)                                | 20 experienced (mean = 11.45 years, SD = 4.35)<br>20 naïve controls                                                      | Participants were required to do 7 min resting period and then look at a sequence of facial expressions randomly assigned as positive, negative or neutral. Each picture was shown for 5s.                                                                    | ERP (Visual)                                                                         | <p>The meditators N170, P200 and P300 were attenuated for both positive and negative pictures and this effect was more prominent over the right hemisphere.</p> <p>No differences found in LPP associated with meditation practices</p> <p>Stronger ERP negativity for N200 and P300(P3a) for meditators compared to the controls, regardless of picture valence.</p>                                                                                                                                                                                                                                                                                                                                                                                                                                                                                                                                                                                                                     |
| Fan Y, Tang YY, Tang R, Posner MI                                                        | Short term integrative meditation improves resting alpha activity and stroop performance                                                                            | 2014 | Integrative bodymind training (IBMT) | CDM                               | Eyes Open                                   | 16                  | FCz                | 43                                            | naïve to meditation before the protocol                                                                                  | <p>Participants were separated into two groups<br/>Group one: 5 days of IBMT<br/>Group two: 5 days of relaxation training</p> <p>EEG was recorded before and after the 5-day training. Each session started with 5 min eyes-open followed by Stroop task.</p> | Spectral (FFT)                                                                       | <p>The IBMT group decreased its stroop reaction time (RT) and showed increased resting mean alpha power.</p> <p>The higher the enhancement of resting alpha power, the stronger the improvement of conflict RT.</p>                                                                                                                                                                                                                                                                                                                                                                                                                                                                                                                                                                                                                                                                                                                                                                       |
| Tanaka GK, Peressutti C, Teixeira S, Cagy M, Piedade R, Nardi AE, Ribeiro P, Velasques B | Lower trait frontal theta activity in mindfulness meditators                                                                                                        | 2014 | mindfulness                          | CDM-OM                            | NA                                          | 20                  | Earlobes           | 20                                            | 10 experienced meditators with at least 5 years of practice (11.61 ± 7.40 years)<br>10 without any meditation experience | <p>The sessions were composed by:</p> <ul style="list-style-type: none"> <li>- 4 min resting state</li> <li>- 40 min Mindfulness meditation</li> <li>- 4 min resting state</li> </ul>                                                                         | Spectral (FFT)                                                                       | <p>Frontal theta (FT) power was statistically significantly greater during the meditation compared to rests 1 and 2 for the F3, F4, F7, and F8 derivations and significantly reduced during rest 2 compared to rest 1 for the Fp1, F7, and F8 derivations).</p> <p>In the control group, the FT power was statistically significantly higher during the meditation compared to rest 1 for all of the derivations studied, although it remained unchanged after the meditation (rest 2) for the Fp1 and F8 derivations.</p>                                                                                                                                                                                                                                                                                                                                                                                                                                                                |
| Hawkes TD, Manselle W, Woolacott MH                                                      | Tai Chi and meditation-plus-exercise benefit neural substrates of executive function: a cross-sectional, controlled study                                           | 2014 | Tai Chi                              | NA                                | NA                                          | 256                 | referenced to VREF | 54                                            | Practitioners were required to have at least 5 years or more of practice for three times/week during 30 minutes/session  | 4 groups: sedentary, aerobic, tai-chi and meditation<br>Each group performed the Visuo-spatial task switch (VSTS)                                                                                                                                             | ERP (Visual)                                                                         | The groups comprehended of Tai-Chi and Meditation+exercise participants showed a larger P3b (late P300) amplitude on switch trials compared to sedentary controls.                                                                                                                                                                                                                                                                                                                                                                                                                                                                                                                                                                                                                                                                                                                                                                                                                        |

| Autors                                                                                          | Title                                                                                                                                           | Year | Meditation                                                                                           | Meditation category (ADM,NDM,CDM) | Eyes open or closed?   | Number electrodes    | EEG reference     | Number participants                                   | Experience                                                                                                                                                                    | Design                                                                                                                                                                                                                                                                                                                                                                                                                          | Method                                                                                                                            | Result                                                                                                                                                                                                                                                                                                                                                                                                                                                                                                                                                                                                             |
|-------------------------------------------------------------------------------------------------|-------------------------------------------------------------------------------------------------------------------------------------------------|------|------------------------------------------------------------------------------------------------------|-----------------------------------|------------------------|----------------------|-------------------|-------------------------------------------------------|-------------------------------------------------------------------------------------------------------------------------------------------------------------------------------|---------------------------------------------------------------------------------------------------------------------------------------------------------------------------------------------------------------------------------------------------------------------------------------------------------------------------------------------------------------------------------------------------------------------------------|-----------------------------------------------------------------------------------------------------------------------------------|--------------------------------------------------------------------------------------------------------------------------------------------------------------------------------------------------------------------------------------------------------------------------------------------------------------------------------------------------------------------------------------------------------------------------------------------------------------------------------------------------------------------------------------------------------------------------------------------------------------------|
| Dissanayaka C, Ben-Simon E, Gruberger M, Maron-Katz A, Hender T, Chaparro-Vargas R, Cvetkovic D | Information flow and coherence of EEG during awake, meditation and drowsiness                                                                   | 2014 | NA                                                                                                   | NA                                | Eyes closed            | 30 (only 6 utilized) | between Fz and Cz | 10 awake<br>10 drowsy<br>10 meditating                | NA                                                                                                                                                                            | Baseline vs Fall Sleep or meditate or remain awake (Eyes closed)                                                                                                                                                                                                                                                                                                                                                                | Coherence (based on Welch's method)<br>Minimum Variance Distortionless Response coherence (MVDNR)<br>Direct Transfer Method (DTM) | Differences in coherence and DTF comparing meditation with other attentive conditions in several frequency bands.                                                                                                                                                                                                                                                                                                                                                                                                                                                                                                  |
| Faber PL, Lehmann D, Gianotti LR, Milz P, Pascual-Marqui RD, Held M, Kochi K                    | Zazen meditation and no-task resting EEG compared with LORETA intracortical source localization                                                 | 2015 | Zazen                                                                                                | CDM-OM                            | Eyes open/ eyes closed | 58                   | NA                | 15 (9 males)                                          | 5-21 (average 5.6)                                                                                                                                                            | Resting (Eyes Open and Eyes Closed)<br>Zazen (Eyes 2/3 closed)                                                                                                                                                                                                                                                                                                                                                                  | Source (sLoreta)                                                                                                                  | In comparison with rest:<br>Increase in alpha1 and alpha2 (right hemisphere frontal areas)<br>Decrease in beta1 and beta2 (bilateral posterior clusters)                                                                                                                                                                                                                                                                                                                                                                                                                                                           |
| Lee YH, Shiah YJ, Chen SC, Wang SF, Young MS, Lin CL                                            | Improved emotional stability in experienced meditators with concentrative meditation based on electroencephalography and heart rate variability | 2015 | Tibetan Nyingmapa                                                                                    | CDM-FA                            | Eyes open              | 6                    | Earlobes          | Experienced: 10 (6 males)<br>Novice: 10 (5 males)     | Experienced: mean 20.5 years<br>novice: 1-5 years                                                                                                                             | Baseline (Eyes open and closed; 4x 60 seconds)<br>5 min meditation (3x with 2 min interval)<br>IAPS pictures with meditation (2x 9 minutes)                                                                                                                                                                                                                                                                                     | Spectral (FFT)<br>Multimodal                                                                                                      | Alpha and theta power increased at frontal and central regions; theta increased at posterior sites; decreased gamma and beta when comparing resting with meditation.<br><br>At visual stimuli experienced meditators increased alpha in frontal and central regions and reduced gamma in central region. Novice meditators alpha, beta and gamma decreased in all recorded channels.                                                                                                                                                                                                                               |
| Dissanayaka C, Ben-Simon E, Gruberger M, Maron-Katz A, Sharon H, Hender T, Cvetkovic D          | Comparison between human awake, meditation and drowsiness EEG activities based on directed transfer function and MVDNR coherence methods        | 2015 | NA                                                                                                   | NA                                | Eyes closed            | 30 (only 6 utilized) | between Fz and Cz | 10 awake<br>10 drowsy<br>10 meditating                | at least 1000h                                                                                                                                                                | Baseline vs condition                                                                                                                                                                                                                                                                                                                                                                                                           | Coherence (based on Welch's method)<br>Minimum Variance Distortionless Response coherence (MVDNR)<br>Direct Transfer Method (DTM) | Significant increase in the flow of information (effective connectivity) in delta was found only in the meditation condition, originating from frontal, parietal and occipital regions.                                                                                                                                                                                                                                                                                                                                                                                                                            |
| Cosme D, Wiens S                                                                                | Self-reported trait mindfulness and affective reactivity: a motivational approach using multiple psychophysiological measures                   | 2015 | NA                                                                                                   | NA                                | Eyes open              | 128                  | CP1               | 51 (26 male)                                          | 7 participants had experience (1-8 years; mean 3.1 years)                                                                                                                     | 51 IAPS figures                                                                                                                                                                                                                                                                                                                                                                                                                 | Multimodal ERP (Visual)                                                                                                           | LLP (400-800ms) amplitudes to pleasant and unpleasant pictures were greater than to neutral pictures. There were no statistically significant main effects of trait mindfulness nor Emotion x Mindfulness interactions. P3 shown no main effect of emotion. There was a main effect of trait mindfulness (FFMQ-NR) on P3 amplitudes, suggesting that P3 amplitudes were generally decreased with higher mindfulness. However, none of the Emotion x Mindfulness interactions was statistically significant.                                                                                                        |
| Jo HG, Hinterberger T, Wittmann M, Schmidt S                                                    | Do meditators have higher awareness of their intentions to act?                                                                                 | 2015 | mindfulness meditation                                                                               | CDM                               | NA                     | 64                   | P9                | 20 (7 males) meditators<br>20 (7 males) control       | 3-32 years (Average 10.1 years)                                                                                                                                               | Two Libet-type tasks                                                                                                                                                                                                                                                                                                                                                                                                            | RP (readiness potential)                                                                                                          | Early RP was different in control group for the two tasks, but not in meditators group. So meditators has a more consistent pattern of readiness potential (RP)                                                                                                                                                                                                                                                                                                                                                                                                                                                    |
| Pasquini HA, Tanaka GK, Basile LF, Velasques B, Lozano MD, Ribeiro P                            | Electrophysiological correlates of long-term Soto Zen meditation                                                                                | 2015 | Soto zen                                                                                             | CDM-OM                            | Eyes open              | 128                  | NA                | 17 (11 male) meditators<br>15 (11 male) control group | >2 years (average 1430h)                                                                                                                                                      | Active and passive ERP visual                                                                                                                                                                                                                                                                                                                                                                                                   | ERP (Visual)                                                                                                                      | Correlations between the frequency of weekly meditation practice at passive observation task and:<br>Increased theta and theta/beta induced relative power                                                                                                                                                                                                                                                                                                                                                                                                                                                         |
| Hauswald A, Uebelacker T, Leske S, Welsch N                                                     | What it means to be Zen: marked modulations of local and interareal synchronization during open monitoring                                      | 2015 | Zen                                                                                                  | CDM-OM                            | Eyes open              | 128                  |                   | 11 (5 males)                                          | 1 mo - 25 years (Average 12 years)                                                                                                                                            | Meditation vs rest post meditation                                                                                                                                                                                                                                                                                                                                                                                              | Network analysis Source (DICS)                                                                                                    | Correlation between 160-170Hz graph measures with MAAS score. Higher levels of mindfulness with lower small wordedness, global and local clustering in paracentral, insular and thalamic regions during meditation.                                                                                                                                                                                                                                                                                                                                                                                                |
| Berman AE, Stevens L                                                                            | EEG manifestations of nondual experiences in meditators                                                                                         | 2015 | TM, Vipassana or Mindfulness meditation, breath/body awareness, mantra meditation and visualization. | CDM-FA<br>CDM-OM<br>NDM           | NA                     | 19                   | Linked ears       | 44 (17 males)                                         | 0.5-44 years ( average 12.64 years)<br><br>up to 1239.94 hours of meditation are considered low experience<br>above 1239.94 hour of meditation are considered high experience | 7.5 min pre meditation (eyes closed) baseline<br>30-60 min eyes closed meditation<br>7.5 min post meditation (eyes closed) baseline<br><br>During meditation participants should wink their left eyes when become aware the they have transitioned from a state of non-thought (or tancendent, mental silence, or nonduality), back into a state of thought. Analysis of 30s before wink with 30 after and with hole meditation | Spectral (FFT)                                                                                                                    | Pre Baseline:<br>Frontal theta and theta2 are higher among participants with higher experience<br>Post baseline:<br>Higher theta2, frontal theta, parietal theta2 and central theta 2 in higher experienced meditators.<br><br>Non duality experience:<br>20 participants shown clear signal of non-duality experiences, in a total of 48 epochs.<br><br>No difference between 30s before and 30s after winks (moment when participant realize returning from a nondual experience).<br>Higher avaral delta, theta and alpha in pre and lower gamma in the 30s before winks comparing with hole meditation period. |

| Autors                                                                                                                                             | Title                                                                                                                                              | Year | Meditation                                                       | Meditation category (ADM,NDM,CDM) | Eyes open or closed?                                                   | Number electrodes                 | EEG reference                                                                                                             | Number participants                                            | Experience                                                                                                         | Design                                                                                                                                                                                                                                                       | Method                                                                 | Result                                                                                                                                                                                                                                                                                                                                                                                                                                                                                                                                                                                                         |
|----------------------------------------------------------------------------------------------------------------------------------------------------|----------------------------------------------------------------------------------------------------------------------------------------------------|------|------------------------------------------------------------------|-----------------------------------|------------------------------------------------------------------------|-----------------------------------|---------------------------------------------------------------------------------------------------------------------------|----------------------------------------------------------------|--------------------------------------------------------------------------------------------------------------------|--------------------------------------------------------------------------------------------------------------------------------------------------------------------------------------------------------------------------------------------------------------|------------------------------------------------------------------------|----------------------------------------------------------------------------------------------------------------------------------------------------------------------------------------------------------------------------------------------------------------------------------------------------------------------------------------------------------------------------------------------------------------------------------------------------------------------------------------------------------------------------------------------------------------------------------------------------------------|
| Telles S, Deepeshwar S, Naveen KV, Pailoor S                                                                                                       | Long Latency Auditory Evoked Potentials during Meditation                                                                                          | 2015 | Meditative focusing (dharana) and Effortless meditation (dhyana) | CDM-FA<br>CDM-OM                  | Meditative focusing (Eyes open)<br>Effortless meditation (Eyes closed) | 1 (Cz)                            | Linked ears                                                                                                               | 48                                                             | >3 months<br>20.9 months average                                                                                   | 4 different interventions<br>Random Rhinking<br>Nonmeditative Focused Thinking<br>Meditative Focusing<br>Meditative Defocusing or Effortless Meditation<br><br>Recording before, during (4 segments) and after intervention.<br><br>Auditory (click) stimuli | EP(Auditory)                                                           | Long latency auditory evoked potential (LLAEP)<br>P1 (40-60ms after click)<br>N1 (80-115ms after click)<br>P2 (140-180ms after click)<br>N2 (200-280ms after click)<br><br>Decrease in latency of the P2 wave during and after meditation<br>P1, P2 and N2 decreased amplitude peak during random thinking and nonmeditative focused thinking.                                                                                                                                                                                                                                                                 |
| Saggar M, Zanesco AP, King BG, Bridwell DA, MacLean KA, Alchehe SR, Jacobs TL, Wallace BA, Saron CD, Miikkulainen R                                | Mean-field thalamocortical modeling of longitudinal EEG acquired during intensive meditation training                                              | 2015 | breath focused FA meditation                                     | CDM-FA                            | Eyes closed                                                            | 88-channel equidistant montage.   | Average of channels                                                                                                       | 22: initial retreat (10 males)<br>22: control group (11 males) | Retreat: M = 2855.6 h, SD = 2994.1<br>Control: M = 2272.7 h, SD = 2326.3                                           | Acquisition during practice at three assessment points during the retreat:<br>- beginning (pre)<br>- Middle (mid)<br>- End (post)                                                                                                                            | Mean-field computational modeling                                      | First, the intrathalamic gain parameter decreased significantly with training<br><br>Second, the corticothalamic delay parameter increased with training, indicating an increase in transmission delay between modeled cortical and thalamic cells.<br><br>Lastly, intra-TRN connectivity analysis implicated a clear anterior-posterior connectivity-based segregation in the modeled TRN layer. While this anterior-posterior connectivity remained stable over training assessments, an increase in between-cluster anterior-posterior connectivity was observed in both retreat groups following training. |
| Tanaka GK, Maslahati T, Gongora M, Bittencourt J, Lopez LC, Demarzo MM, Budde H, Teixeira S, Basile LF, Campayo JG, Cagy M, Ribeiro P, Velasques B | Effortless Attention as a Biomarker for Experienced Mindfulness Practitioners                                                                      | 2015 | Open Monitoring                                                  | CDM-OM                            | NA                                                                     | 20 (only 8 frontals are analysed) | Earlobes                                                                                                                  | 11 experienced (7 males)<br>10 naive (5 males)                 | at least 5 years (average 12.23 years)                                                                             | 4 min pre baseline<br>40 min meditation (with analysis in the period 30-34min)<br>4 min post baseline                                                                                                                                                        | Spectral (FFT)                                                         | Lower frontal power beta in experienced group in all analysed epochs                                                                                                                                                                                                                                                                                                                                                                                                                                                                                                                                           |
| Saunders B, Rodrigo AH, Inzlicht M                                                                                                                 | Mindful awareness of feelings increases neural performance monitoring                                                                              | 2016 | Mindfulness                                                      | CDM                               | N/A                                                                    | 7                                 | Bilateral earlobes                                                                                                        | 41 participants                                                | N/A (it seems that they were naive)                                                                                | Participants were randomly assigned to emotion-focused or tough-focused group.<br>All participants did a go/no-go experiment pre and post introductory meditation instructions according to the assigned group-                                              | ERP (Visual)                                                           | The participants from the emotion focused group had a higher ERN which had no effect on the thought focused group.<br>None of the groups showed alterations in the Pe activity.                                                                                                                                                                                                                                                                                                                                                                                                                                |
| Fingelkurts AA, Fingelkurts AA, Kallio-Tamminen T                                                                                                  | Long-term meditation training induced changes in the operational synchrony of default mode network modules during a resting state                  | 2016 | Kriya Yoga                                                       | CDM                               | Eyes closed                                                            | 19                                |                                                                                                                           | 10                                                             | 4 months                                                                                                           | Resting state                                                                                                                                                                                                                                                | Synchrony (Alpha DMN Operational synchrony)                            | Decrease of operational synchrony within the DMN after 4 months of training.                                                                                                                                                                                                                                                                                                                                                                                                                                                                                                                                   |
| Hinterberger T, von Haugwitz A, Schmidt S                                                                                                          | Does a Healing Procedure Referring to Theta Rhythms Also Generate Theta Rhythms in the Brain?                                                      | 2016 | Theta healing                                                    | CDM                               | Eyes open and closed                                                   | 32                                | Common reference between 2 persons                                                                                        | 10 healers<br>10 clients                                       | Healers were experienced trainers and clients were naive to the technique                                          | 4 pre and post resting states (eyes open and eyes closed) and 6 sessions of Theta Healing                                                                                                                                                                    | Spectral (FFT)                                                         | Significant decrease in Theta-2 band in the healers. Small correlation in the amplitudes of theta-2 band between healer and client and a small phase synchrony in the theta frequencies                                                                                                                                                                                                                                                                                                                                                                                                                        |
| Bing-Canar H, Pizzuto J, Compton RJ                                                                                                                | Mindfulness-of-breathing exercise modulates EEG alpha activity during cognitive performance.                                                       | 2016 | Mindfulness of breathing                                         | CDM-FA                            | Eyes open                                                              | 10                                | Right mastoid                                                                                                             | 23 mindfulness group (9 males)<br>21 control group (5 males)   | NA                                                                                                                 | Audio Listening and Stroop Task                                                                                                                                                                                                                              | Spectral (FFT)<br>ERP(Visual)                                          | Higher alpha in mindful group listening the audio.<br>No change in alpha during stimuli processing.<br>Error Related Alpha Suppression on stroop task was higher in mindful group than control.<br>ERP: no significant effects involving groups                                                                                                                                                                                                                                                                                                                                                                |
| Jo HG, Schmidt S, Inacker E, Markowiak M, Hinterberger T                                                                                           | Meditation and attention: A controlled study on long-term meditators in behavioral performance and event-related potentials of attentional control | 2016 | Various meditation centers                                       | NA                                | NA                                                                     | 64                                | Fpz                                                                                                                       | 20 meditators (8 males)<br>20 controls (8 males)               | More than 5 years (Average 13.7 years)                                                                             | Attentional Network Test that comprises cued detection (i.e. tasks involving different types of warning cues in advance) and a flanker-type paradigm (congruent and incongruent target stimuli).                                                             | ERP (Visual)                                                           | Higher parietal P3 amplitude in meditators during incongruent target in comparison with control.                                                                                                                                                                                                                                                                                                                                                                                                                                                                                                               |
| Gao J, Fan J, Wu BW, Zhang Z, Chang C, Hung YS, Fung PC, Sik HH                                                                                    | Entrainment of chaotic activities in brain and heart during MBSR mindfulness training                                                              | 2016 | MBSR                                                             | CDM                               | Eyes closed                                                            | 128                               | Left mastoid                                                                                                              | 11 (6 males)                                                   | 8 weeks (some have previous experience in contemplative practices, but not reported the length of this experience) | Resting<br>Mindful breathing<br><br>2 weeks after begning of course and less than on month after the course                                                                                                                                                  | Spectral (FFT)<br>Non-linear (Wavelet entropy)<br>Source<br>Multimodal | FFT:<br>Higher alpha and beta and lower delta in meditation in comparison with resting. With no difference between early-stage and post stage.<br><br>Wavelet entropy:<br>Decreased during meditation compared with resting. No difference between early-stage and post-stage.<br>Correlation between hear and brain correlated during meditation, but not during resting.                                                                                                                                                                                                                                     |
| Atchley R, Klee D, Memmott T, Goodrich E, Wahbeh H, Oken B.                                                                                        | Event-related potential correlates of mindfulness meditation competence.                                                                           | 2016 | Mindfulness                                                      | CDM-FA                            | Eyes closed                                                            | 32                                | Online recordings referenced a common mode sense (CMS) and driven right leg (DRL) electrodes, halfway between Cz and C3/4 | 42                                                             | Three groups:<br>Naive subjects<br>Novel to meditation (2.4 y SD 2.5)<br>Expert meditators (22.6y SD 13.2)         | Oddball<br><br>Participants were instructed to respond to target tones with a button press in the first task (Tones), and then ignore the primed tones while breath counting.                                                                                | ERP (Auditory)                                                         | The p3 amplitude was higher for target tones in meditators than in controls, on the other hand, meditators showed greater attenuation of the p3 amplitude during Breath Counting, when they were instructed to ignore the tones                                                                                                                                                                                                                                                                                                                                                                                |



| Autors                                                                                                        | Title                                                                                                                     | Year | Meditation                                                                   | Meditation category (ADM,NDM,CDM) | Eyes open or closed? | Number electrodes  | EEG reference                                                                 | Number participants                                                                                                        | Experience                                                                                           | Design                                                                                                                                                                                                                                                                                                                                      | Method                                             | Result                                                                                                                                                                                                                                                                                                                                                                                                                                                                                                                                                                                                                                                                                                                                                                                                                                                                                                                                    |
|---------------------------------------------------------------------------------------------------------------|---------------------------------------------------------------------------------------------------------------------------|------|------------------------------------------------------------------------------|-----------------------------------|----------------------|--------------------|-------------------------------------------------------------------------------|----------------------------------------------------------------------------------------------------------------------------|------------------------------------------------------------------------------------------------------|---------------------------------------------------------------------------------------------------------------------------------------------------------------------------------------------------------------------------------------------------------------------------------------------------------------------------------------------|----------------------------------------------------|-------------------------------------------------------------------------------------------------------------------------------------------------------------------------------------------------------------------------------------------------------------------------------------------------------------------------------------------------------------------------------------------------------------------------------------------------------------------------------------------------------------------------------------------------------------------------------------------------------------------------------------------------------------------------------------------------------------------------------------------------------------------------------------------------------------------------------------------------------------------------------------------------------------------------------------------|
| Tomljenović H, Begić D, Maštrović Z                                                                           | Changes in trait brainwave power and coherence, state and trait anxiety after three-month transcendental meditation       | 2016 | TM                                                                           | NDM                               | eyes closed          | 8                  | NA                                                                            | 12 (7 males)                                                                                                               | 3 participants had prior experience (on average 2 months)<br>all participants did a 3 months retreat | Before and after 3 months retreat<br><br>Supine position at resting (no meditating) with eyes closed (except in short eyes open epoch - excluded from this study)                                                                                                                                                                           | Spectral (FFT)<br>Coherence                        | Results: Changes in EEG patterns after meditation practice were found mostly in the theta band. An interaction effect was found on the left hemisphere ( $p<0.10$ ). Theta power decreased on the left, but not on the right hemisphere. Increased theta coherence was found overall and in the central, temporal and occipital areas ( $p<0.10$ ). Decrease in alpha power was found on channels T3 ( $p<0.10$ ), O1 ( $p<0.05$ ) and O2 ( $p<0.10$ ). An interaction effect was found in the delta frequency band ( $p<0.06$ ), too. Also, power decreased on channel O1 ( $p<0.10$ ). In the beta frequency band, a decrease was found on channel O2 ( $p<0.10$ ). Trait anxiety did not differ, but a decrease in state anxiety and cognitive worry was found ( $p<0.05$ ).                                                                                                                                                           |
| Panda R, Bharath RD, Upadhyay N, Mangalore S, Chennu S, Rao SL                                                | Temporal Dynamics of the Default Mode Network Characterize Meditation-Induced Alterations in Consciousness                | 2016 | Raja yoga                                                                    | CDM/FA                            | Eyes closed          | 31                 | FCz                                                                           | 20 meditators (all males)<br>20 controls (all males)                                                                       | 10-22 years (average 15.2 years)                                                                     | 9.24 min Resting state (meditators and control)<br>9.24 min Meditation (meditators)                                                                                                                                                                                                                                                         | Spectral (FFT)<br>Multimodal (fMRI)<br>Microstates | FFT:<br>Higher alpha, theta and beta in meditation when compared to resting (Meditators group only).<br><br>Microstates:<br>At rest meditator has increased duration and higher frequency of DMN microstate in comparison with controls.<br>During meditation duration and frequency where higher than in resting for meditators.<br>Positive correlation of DMN-microstate duration at rest and meditation with years of practice. Net increase (from resting to meditation) of duration of DMN-microstate was negatively with years of meditation.                                                                                                                                                                                                                                                                                                                                                                                      |
| DeLosAngeles D, Williams G, Burston J, Fitzgibbon SP, Lewis TW, Grummett TS, Clark CR, Pope KJ, Willoughby JO | Electroencephalographic correlates of states of concentrative meditation                                                  | 2016 | BreathMindfulness Discourse (Type of mindfulness directed to breathing only) | CDM/FA                            | Eyes closed          | 116 EEG electrodes | left ear reference                                                            | 12 meditators<br>12 paired naive participants                                                                              | 4 to 34 years of experience                                                                          | Both groups had to follow randomized audio guided instructions on meditation (~29min), perception experiment (~11min) and a steady-state response experiment (~18min). Baseline and mind-wandering was also recorded. Recording were done inside a Faraday cage                                                                             | Spectral (Power)                                   | Overall increase in alpha power independent of meditation depth. In deeper meditation states the authors observed decreased central scalp beta and central low gamma and increase in theta power. The difference in brain states and meditation depth was only seen in meditators                                                                                                                                                                                                                                                                                                                                                                                                                                                                                                                                                                                                                                                         |
| Biedermann B, de Lissa P, Mahajan Y, Polito V, Badcock N, Connors MH, Quinto L, Larsen L, McArthur G          | Meditation and auditory attention: An ERP study of meditators and non-meditators                                          | 2016 | Zen and Tibetan Mahayana practice                                            | CDM NDM                           | NA                   | 30                 | Referenced to the online do the left mastoid and offline to the right mastoid | 12 meditators<br>14 paired naive participants                                                                              | 10 to 35 years                                                                                       | Two blocks of 13 minutes of 666 randomized and jittered pure tones of 175ms duration (10ms rise and fall time).<br>One block was during meditation and the other during a non-meditation condition.<br><br>Each block presented 566 1000-Hz "standard" tones (85% of trials) interspersed with 100 1200-Hz "deviant" tones (15% of trials). | ERP (Auditory)                                     | MMN was significantly larger in meditators than non-meditators in the meditative and non-meditative conditions.<br><br>N1 amplitude was significantly attenuated in non-meditators in the meditation condition but this was not observed for the meditators group.                                                                                                                                                                                                                                                                                                                                                                                                                                                                                                                                                                                                                                                                        |
| Brandmeyer T, Delorme A                                                                                       | Reduced mind wandering in experienced meditators and associated EEG correlates                                            | 2016 | Himalayan Yoga                                                               | CDM-FA/OM                         | Eyes closed          | 64                 | NA                                                                            | Experts (9 males)<br>Non-experts (2 males)                                                                                 | Experts > 2h daily meditation at least 1 year<br>Non-experts (average 3.2h meditation weekly)        | Question about meditation deep, mind wandering and how tired they are randomly spaced between 30 and 90s. Recorded from 45-90min. Minimum 30 probes per participant.                                                                                                                                                                        | Spectral (Wavelets)                                | Experts had higher theta in frontal cortex and alpha over somatosensory cortex during meditation in comparison with mind wandering. No differences in non-experts.                                                                                                                                                                                                                                                                                                                                                                                                                                                                                                                                                                                                                                                                                                                                                                        |
| Chandra S, Sharma G, Sharma M, Jha D, Mittal AP.                                                              | Workload regulation by Sudarshan Kriya: an EEG and ECG perspective                                                        | 2017 | Sudarshan Kriya Yoga                                                         | CDM-FA                            | NA                   | 14                 | Right and Left mastoids                                                       | Randomly assigned between control and experimental groups<br>10: Control<br>15: Experimental all males                     | Novices                                                                                              | Data acquired in a baseline and in a workload task (Low and High)<br>Pre and post meditation data acquired over a period of 30-90 days                                                                                                                                                                                                      | Multimodal<br>Spectral (Wavelets)                  | Increase in the alpha and beta energies and root mean square of the EEG signal for the experimental group                                                                                                                                                                                                                                                                                                                                                                                                                                                                                                                                                                                                                                                                                                                                                                                                                                 |
| Travis F, Parim N                                                                                             | Default mode network activation and Transcendental Meditation practice: Focused Attention or Automatic Self-transcending? | 2017 | TM                                                                           | NDM                               | Eyes closed          | 32                 | Left and right earlobes                                                       | 87 (45 males)                                                                                                              | 1 month - 5 years (Average: 1.3 years)                                                               | 5 min Eyes closed resting<br>4 min attention task<br>5 min TM session                                                                                                                                                                                                                                                                       | Source (eLORETA)                                   | Results from TM vs resting eyes closed<br>Higher theta in BA25, 47 during TM<br>Lower in beta1 BA 20, 21 during TM                                                                                                                                                                                                                                                                                                                                                                                                                                                                                                                                                                                                                                                                                                                                                                                                                        |
| Braboszcz C, Cahn BR, Levy J, Fernandez M, Delorme A                                                          | Increased Gamma Brainwave Amplitude Compared to Control in Three Different Meditation Traditions                          | 2017 | Vipassana, Himalayan Yoga and Isha Shoonya                                   | CDM-FA/OM                         | Eyes closed          | 64                 | right mastoid                                                                 | 16 (Vipassana) (11 males)<br>16 (Himalayan Yoga) (14 males)<br>16 (Isha Shoonya Yoga) (14 males)<br>16 Controls (14 males) | Averages (in hours)<br>Himalayan: 15457<br>Isha: 2625<br>Vipassana: 9201                             | Instructed Mind Wandering (20 min)<br><br>Meditation (each meditator practiced its own method and controls were asked to pay attention to their breath) (20 min)<br><br>For both only the last 10 min were analysed                                                                                                                         | Spectral (FFT)                                     | Gamma power (60-110Hz) was higher in meditators over parieto-occipital electrodes with 2 conditions (meditation and mind wandering) combined, and Isha Yoga practitioners additionally increase over central and frontal electrodes.<br><br>When comparing meditation condition the gamma power in all meditator groups where higher than controls over fronta, midline and occipital electrodes site.<br><br>Inter-group comparison resulted in higher Gamma over 2-11Hz power ratio for Himalayan yoga group compared to control group, both during meditation and during mind wandering.<br><br>Correlation between hours of meditation and gamma power were found combining both conditions and with mind wandering, but not with gamma power during meditation only.<br><br>Alpha: All groups has alpha power higher than control group during meditation and mind-wandering, and Vipassana group were higher than all other groups. |

| Autors                                                                           | Title                                                                                                                                                    | Year | Meditation                                                                                                                                        | Meditation category (ADM,NDM,CDM) | Eyes open or closed? | Number electrodes | EEG reference           | Number participants                                            | Experience                                                                                                                                                  | Design                                                                                                                                                                                                                                                                                                                                                                                                                     | Method                                               | Result                                                                                                                                                                                                                                                                                                                                                                                                                                                                                                                                                                                                                                                                                                                                                                                                                                                                                                                                                                                                                                                                                                  |
|----------------------------------------------------------------------------------|----------------------------------------------------------------------------------------------------------------------------------------------------------|------|---------------------------------------------------------------------------------------------------------------------------------------------------|-----------------------------------|----------------------|-------------------|-------------------------|----------------------------------------------------------------|-------------------------------------------------------------------------------------------------------------------------------------------------------------|----------------------------------------------------------------------------------------------------------------------------------------------------------------------------------------------------------------------------------------------------------------------------------------------------------------------------------------------------------------------------------------------------------------------------|------------------------------------------------------|---------------------------------------------------------------------------------------------------------------------------------------------------------------------------------------------------------------------------------------------------------------------------------------------------------------------------------------------------------------------------------------------------------------------------------------------------------------------------------------------------------------------------------------------------------------------------------------------------------------------------------------------------------------------------------------------------------------------------------------------------------------------------------------------------------------------------------------------------------------------------------------------------------------------------------------------------------------------------------------------------------------------------------------------------------------------------------------------------------|
| Nair AK, Sasidharan A, John JP, Mehrotra S, Kutty BM                             | Just a minute meditation: Rapid voluntary conscious state shifts in long term meditators                                                                 | 2017 | Brahma Kumaris Rajayoga                                                                                                                           | CDM                               | Eyes open and closed | 128               | NA                      | 25 - controls (meditation naive); 36 long term; 25 short term. | 36 long term meditators: 14240 h meditation; 25 short term meditators: 1095 h.                                                                              | Two rest and meditation protocols were performed. Each session contained rest eyes open, rest eyes closed, meditation eyes open and meditation eyes closed. A cognitive test was applied. Next, two more rest and meditation sessions were held.                                                                                                                                                                           | Spectral (FFT)                                       | Long term meditators showed enhanced upper theta power in the frontocentral and central electrodes during eyes open meditation and lower theta power and upper theta power to most regions except the frontal and frontopolar electrode during eyes closed meditation, compared to rest. There was increased lower alpha power in the frontal and occipital regions in short term meditators during eyes closed meditation compared to rest. Long term meditators showed increased lower alpha power during eyes open meditation vs rest, in the session after cognitive test. Considering eyes closed meditation vs rest there was enhanced lower and upper theta power in the session before cognitive test. Long term meditators had changes during subsequent states in delta, lower theta, lower alpha and lower beta power within each rest and meditation session compared to baseline rest and changes between rest and meditation in lower theta and lower beta power. Short term meditators and controls showed alterations in lower and upper theta and lower beta power during eyes closed. |
| Kornmeier J, Friedel E, Wittmann M, Atmanspacher H                               | EEG correlates of cognitive time scales in the Necker-Zeno model for bistable perception                                                                 | 2017 | meditation types who have a dominant orientation toward awareness of the present moment (mindfulness meditation, Vipassana meditation, Soto Zen). | CDM-OM                            | Eyes open            | 32                | Average of TP9 and TP10 | 12 experienced meditators (3 males) 15 controls (5 males)      | at least 3 years of continuous practice and had practiced at least 2 h per week over the last 8 weeks.                                                      | Experiments 1 and 2: Spaced presentations of ambiguous necker Cube figures<br><br>Condition 1: Indicate when an inversion is perceived<br>Condition 2: Try to sustain one perception<br><br>Experiment 3: oddball                                                                                                                                                                                                          | ERP (Visual)                                         | Experiments 1 and 2: CPP- Centro-Parietal Positivity ~500ms after stimuli<br>Experienced meditators can volitionally control duration of meta-stable percepts<br><br>Experiment 3: P300<br>No difference between latency of meditators and controls                                                                                                                                                                                                                                                                                                                                                                                                                                                                                                                                                                                                                                                                                                                                                                                                                                                     |
| van Lutterveld R, van Dellen E, Pal P, Yang H, Stam CJ, Brewer J                 | Meditation is associated with increased brain network integration.                                                                                       | 2017 | Effortless awareness (mindfulness based)                                                                                                          | CDM-OM                            | Eyes open            | 128 + EOG         | NA                      | 16 novice (11 male) 16 experienced meditators (13 male)        | novice: no practice or less than 20 hours in the entire lifetime<br>experienced: at least 30 min per day for at least 5 days per week over the past 5 years | 30s baseline - participants viewed trait-adjectives and assessed if the words described themselves<br>3.5 min effortless meditation                                                                                                                                                                                                                                                                                        | Network (PLI)                                        | experienced meditators had a maximum betweenness centrality in alpha significantly higher than novices.<br>Novice participants had a significantly lower diameter and average eccentricity in the alpha band.<br>Theta and beta bands showed no significant differences among groups<br><br>Functional network topology for the alpha band is more integrated in experienced meditators than in novice                                                                                                                                                                                                                                                                                                                                                                                                                                                                                                                                                                                                                                                                                                  |
| Jo HG, Malinowski P, Schmidt S.                                                  | Frontal Theta Dynamics during Response Conflict in Long-Term Mindfulness Meditators                                                                      | 2017 | Mindfulness                                                                                                                                       | CDM- FA/OM                        | Eyes Open            | 64 + EOG          | Initial ref at FPz      | 22 meditators (15 females) 23 matched controls (15 females)    | average meditation period 13.1 years (SD = 5.9) and 247.8 min (SD=104.9) per week                                                                           | flanker-type paradigm                                                                                                                                                                                                                                                                                                                                                                                                      | ERP (Visual) Synchronization (PLV)                   | Meditators responded significantly more accurately than controls especially in incongruent trials.<br>Increased theta power during incongruent trials compared to congruent in FCz. Meditators showed higher power in both incongruent and congruent trials than controls.<br>Enhanced synchrony during incongruent compared to congruent trials and significant interaction congruency x group (before response onset) in particular for functional connectivity between medial frontal cortex and motor cortex.                                                                                                                                                                                                                                                                                                                                                                                                                                                                                                                                                                                       |
| Sik HH, Gao J, Fan J, Wu BWY, Leung HK, Hung YS                                  | Using Wavelet Entropy to Demonstrate how Mindfulness Practice Increases Coordination between Irregular Cerebral and Cardiac Activities                   | 2017 | Mindful breathing (MBSR)                                                                                                                          | CDM- FA/OM                        | Eyes closed          | 128               | Average of all channels | 11 (6 males)                                                   | novice                                                                                                                                                      | Before and after 8 week MBSR                                                                                                                                                                                                                                                                                                                                                                                               | Multimodal Non-Linear (Wavelet Entropy) Source (MNE) | The wavelet entropy of the brain EEG decreased during the MBSR mindful breathing state as compared to that during the closed-eye resting state. No difference in wavelet entropy during MBSR mindful breathing was found between the pretest and posttest.                                                                                                                                                                                                                                                                                                                                                                                                                                                                                                                                                                                                                                                                                                                                                                                                                                              |
| Faber PL, Travis F, Milz P, Parim N                                              | EEG microstates during different phases of Transcendental Meditation practice                                                                            | 2017 | TM                                                                                                                                                | NDM                               | Eyes closed          | 32                | Mean reference          | 20                                                             | 11.6 years; SD=16.1 years range 1 month-43.3 years                                                                                                          | resting vs undirected mentation (UM) vs transcending (TR)                                                                                                                                                                                                                                                                                                                                                                  | Microstates                                          | UM compared to both resting and TR: higher coverage and occurrence of Class A, and lower coverage and occurrence of Class D<br><br>Compared to TR, UM was marked by significantly higher coverage and occurrence of Class C.<br><br>Microstates during TR did not differ from those during no-task resting before the meditation practice.                                                                                                                                                                                                                                                                                                                                                                                                                                                                                                                                                                                                                                                                                                                                                              |
| Lee YH, Hsieh YJ, Shiah YJ, Lin YH, Chen CY, Tyan YC, Gengliu J, Hsu CY, Chen SC | A cross-sectional evaluation of meditation experience on electroencephalography data by artificial neural network and support vector machine classifiers | 2017 | Focused breathing                                                                                                                                 | CDM-FA                            | NA                   | 6                 | earlobe (A1 and A2)     | 10 Senior (7 males) 10 Junior (5 males) 10 Novice (3 males)    | Senior: 10-30 years (Average: 17.10 years)<br>Junior: 1-7 years (Average=6.00 years)<br>Novice: no experience                                               | Baseline: 4 blocks of 60s in counterbalanced random sequential of 30s open-eyes and 30s closed-eyes in each block.<br>Meditation: 3 runs of 5 minutes with 2 min rest between each meditation period.<br>FFT of Alpha were used to feature extraction. Peak, Frequency of peak and mean value were utilized. 2 normalized scales were tested (0-1, N1, and 0-10 N10)<br>SVM and ANN classifier were tested in this dataset | Spectral (FFT) Classifier (SVM and ANN)              | Best classification were obtained with an 1.5 minute window size, step of 2 seconds.<br><br>ANN had a higher than 98% of the true-positive rate is achieved for each group's classification in 100 runs and <0.8% of false-positive rate is detected for misclassification, that is, 0.57% and 0.45% of the senior experienced meditators are assigned to junior and novice groups, respectively; 0.32% and 0.33% of junior experienced meditators are assigned to senior and novice groups, respectively; 0.77% and 0.40% of novice meditators are assigned to senior and junior groups, respectively.<br><br>SVM shows 100% of the true-positive rate and 0% of false-positive rate at classification under such a specific circumstance.                                                                                                                                                                                                                                                                                                                                                             |

| Autors                                                                                          | Title                                                                                                                                                  | Year | Meditation                   | Meditation category (ADM,NDM,CDM) | Eyes open or closed?            | Number electrodes                    | EEG reference                            | Number participants                                                                         | Experience                                                                                                                                                                                                                                                                                                                          | Design                                                                                                                                                                                                                                                                                                                                                                                                                                                                                      | Method                                            | Result                                                                                                                                                                                                                                                                                                                                                                                                                                                                                                                                                                                                                                                                                                                                                                                                                                                                                                                                                                                                                                                                                                                                                                                                                                                                                                                                                                         |
|-------------------------------------------------------------------------------------------------|--------------------------------------------------------------------------------------------------------------------------------------------------------|------|------------------------------|-----------------------------------|---------------------------------|--------------------------------------|------------------------------------------|---------------------------------------------------------------------------------------------|-------------------------------------------------------------------------------------------------------------------------------------------------------------------------------------------------------------------------------------------------------------------------------------------------------------------------------------|---------------------------------------------------------------------------------------------------------------------------------------------------------------------------------------------------------------------------------------------------------------------------------------------------------------------------------------------------------------------------------------------------------------------------------------------------------------------------------------------|---------------------------------------------------|--------------------------------------------------------------------------------------------------------------------------------------------------------------------------------------------------------------------------------------------------------------------------------------------------------------------------------------------------------------------------------------------------------------------------------------------------------------------------------------------------------------------------------------------------------------------------------------------------------------------------------------------------------------------------------------------------------------------------------------------------------------------------------------------------------------------------------------------------------------------------------------------------------------------------------------------------------------------------------------------------------------------------------------------------------------------------------------------------------------------------------------------------------------------------------------------------------------------------------------------------------------------------------------------------------------------------------------------------------------------------------|
| Henz D, Schöllhorn WI                                                                           | EEG Brain Activity in Dynamic Health Qigong Training: Same Effects for Mental Practice and Physical Training?                                          | 2017 | Qigong                       | CDM-FA/OM                         | Eyes open/ Eyes closed          | 19                                   | NA                                       | 25 (12 males)                                                                               | At least 1h practice per week for 1 year and participation on a Qigong workshop (30h)                                                                                                                                                                                                                                               | 2 min resting with eyes open and 2 min resting with eyes closed<br>Before training and after 3 randomly selected interventions:<br>1) 15 min Qigong physical exercise<br>2) 15 min Qigong mental training (participants were required to perform the movement sequence mentally, applying the same breathing technique in the mental practice condition as in the physical training)<br>3) a video showing practitioners performing the Qigong practice of the physical and mental exercise | Spectral (FFT)                                    | Theta: increased after physical and mental Qigong training compared to the video control condition. Differences between eyes-open, eyes-closed. Significant results for training x condition. Decreased in the eyes-closed condition compared to physical training, video control, and baseline rest. Theta power increased at frontal, central, parietal electrodes, and occipital electrodes.<br><br>Alpha-1: increased after physical and mental Qigong training compared to the control condition. No difference was obtained between physical and mental Qigong practice. Differences between eyes-open, eyes closed. Alpha-1 power was higher at central, and parietal electrodes than frontal, temporal, and occipital electrodes.<br><br>Alpha-2: higher after physical Qigong training compared to mental practice, video control. Differences between eyes-open, eyesclosed. Alpha-2 power at central, and parietal electrodes was higher than that of frontal, temporal and occipital electrodes. No difference between mental practice and video control.<br><br>Beta: increased in the video control condition, compared to mental practice, physical training. Differences between eyes-open, eyes-closed. Significant results for training x condition. Beta power central electrodes <b>higher than frontal, temporal, parietal, and occipital electrodes.</b> |
| Rodin E, Bornfleth H, Johnson M                                                                 | DC-EEG recordings of mindfulness                                                                                                                       | 2017 | Yoga Nidra                   | NDM                               | Eyes closed                     | 128                                  | NA                                       | 10 (5 males)                                                                                | NA                                                                                                                                                                                                                                                                                                                                  | 1h guided Yoga nidra                                                                                                                                                                                                                                                                                                                                                                                                                                                                        | Spectral (FFT) Source (Beamforming)               | Delta (0.5-3.3Hz)<br>InfraSlow Activity (0.0002-0.1Hz)<br><br>Exploratory analysis. Show that are ICA components that starts negative and become posive during this 1 hour period, as well rhythmic wave durations from about 10 to 35 min. The topographic distribution was mainly in frontal near midline areas and the inferior prtions of the hemispheres.<br><br>data demonstrate that the normal alert human brain does indeed produce rhythmic as well as more random activity well below the Infraslow band.                                                                                                                                                                                                                                                                                                                                                                                                                                                                                                                                                                                                                                                                                                                                                                                                                                                           |
| Travis F, Parim N, Shrivastava A                                                                | Higher theta and alpha1 coherence when listening to Vedic recitation compared to coherence during Transcendental Meditation practice.                  | 2017 | TM                           | NDM                               | Eyes closed                     | 32                                   | Left and Right ear lobes                 | 37 (17 males)                                                                               | Average: 34.0 years of TM and 28.6 years of TM-Shidhi                                                                                                                                                                                                                                                                               | 15 min TM practice<br>1h live recitation of Vedic literature                                                                                                                                                                                                                                                                                                                                                                                                                                | Coherence                                         | Theta2 and alpha1 frontal, parietal, and frontal-parietal coherence were significantly higher when listening to Vedic recitation, than during TM practice.                                                                                                                                                                                                                                                                                                                                                                                                                                                                                                                                                                                                                                                                                                                                                                                                                                                                                                                                                                                                                                                                                                                                                                                                                     |
| Malinowski P, Moore AW, Mead BR, Gruber T                                                       | Mindful Aging: The Effects of Regular Brief Mindfulness Practice on Electrophysiological Markers of Cognitive and Affective Processing in Older Adults | 2017 | Mindfull breath awareness    | CDM-FA                            | NA                              | 64                                   | Common Mode Sense (Additional Electrode) | 18 per group<br>Meditator group: 3 males<br>Control group: 4 males                          | No experience. Two randomized groups, one received training and was asked to meditate regularly for a minimum of 10 min/day, 5 days/week. For 8 weeks, they attended 4 90 minutes group sections<br><br>Active control group performed brain training, which encompasses mental arithmetic calculations.                            | Meditators versus controls, with acquisitions of the Emotional-Counting Stroop task before and after training                                                                                                                                                                                                                                                                                                                                                                               | ERP (Visual) Source (VARETA)                      | N2 (270 to 340 ms) at FCz: increased N2 for meditators as compared to a relative (albeit not significant) decrease for controls. Furthermore, changes in the N2 amplitude from before and after training were positively correlated with reductions in reaction times<br><br>P300 in Pz did not have difference in groups.<br><br>VARETA: N2-related effect is primarily associated with changes in the right angular gyrus and other areas of the dorsal attention network (right superior, parietal lobe, right inferior temporal lobe, and the left lingual gyrus).                                                                                                                                                                                                                                                                                                                                                                                                                                                                                                                                                                                                                                                                                                                                                                                                         |
| Schoenberg PLA, Ruf A, Churchill J, Brown DP, Brewer JA.                                        | Mapping complex mind states: EEG neural substrates of meditative unified compassionate awareness                                                       | 2018 | Essence of mind              | NDM                               | Eyes open and closed alternated | 128                                  | NA                                       | 20 (14 males)                                                                               | Meditation capacity and advancement was rated by two independent teachers of the method (including the teacher who provided the meditation guidance within the experiment), via a 0–10 scaling system.<br><br>Score above 6 was necessary for participating on the study and average of 8.09 of meditation capacity and advancement | 3 min of eyes open followed by 3 min eyes closed baseline<br>4 blocks of 15 min of meditation (4 different states of meditation) - 5 min guided meditation followed by 10 min silent meditation<br><br>2.5 min of each baseline and 10min of silent meditation were analysed                                                                                                                                                                                                                | Source (LORETA)                                   | Baseline vs Meditative stage 1:<br>Decreased activity in DMN, ACC, Insula, Precuneus, PCC, Superior and inferior parietal lobule in Alpha, Beta and Gamma<br>Decreased activity in mvPFC in Alpha<br><br>Increased current density magnitude in beta between meditation states (S1to S4)<br>Increased gamma1, gamma2 and beta current density from S1 to S4                                                                                                                                                                                                                                                                                                                                                                                                                                                                                                                                                                                                                                                                                                                                                                                                                                                                                                                                                                                                                    |
| Irmischer, M., Houtman, S. J., Mansvelde, H. D., Tremmel, M., Ott, U., and Linkenkaer-Hansen, K | Controlling the temporal structure of brain oscillations by focused attention meditation                                                               | 2018 | Focused attention meditation | CDM-FA                            | Eyes closed                     | Experiment 1:128<br>Experiment 2: 32 | common average                           | Experiment 1:8 (4 males)<br>Experiment 2: 20 meditators (10 males)<br>10 controls (5 males) | Experiment 1: minimum 5 years (M=18; SD=10.7)<br>Experiment 2: 1 mont to 33 years (M=10.8; SD = 10.2)                                                                                                                                                                                                                               | Meditation vs baseline                                                                                                                                                                                                                                                                                                                                                                                                                                                                      | Non Linear (Detrended Fluctuation Analysis - DFA) | Temporal complexity of brain-activity fluctuations suppressed in experienced meditators.<br><br>A sustained practice over a period of a year increased the effect and affected normal waking brain dynamics, as reflected in increased LRTC during an eyes-closed resting state.                                                                                                                                                                                                                                                                                                                                                                                                                                                                                                                                                                                                                                                                                                                                                                                                                                                                                                                                                                                                                                                                                               |
| Sharma K, Chandra S, Dubey AK                                                                   | Exploration of Lower Frequency EEG Dynamics and Cortical Alpha Asymmetry in Long-term Rajyoga Meditators                                               | 2018 | Rajyoga                      | ADM                               | eyes open                       | 61                                   | CPz                                      | 31 Long Term meditators (all males)<br>31 Control group (all males)                         | Long Term meditators: > 10 years<br>Controls: No experience                                                                                                                                                                                                                                                                         | Baseline (5 min)<br>Meditation (10 min); controls sit in a relaxed wakefulness condition with eyes open                                                                                                                                                                                                                                                                                                                                                                                     | Spectral (FFT, $\alpha$ asymmetry)                | Results reveal high-band power in alpha and theta spectra in meditators. Cortical asymmetry calculated through EEG power was also found to be high in frontal as well as parietal channels.<br>No correlation was found between the total number of hours spent in meditation and any of the EEG band power variations.                                                                                                                                                                                                                                                                                                                                                                                                                                                                                                                                                                                                                                                                                                                                                                                                                                                                                                                                                                                                                                                        |

| Autors                                                                                            | Title                                                                                                                                       | Year | Meditation                                      | Meditation category (ADM,NDM,CDM) | Eyes open or closed?                                        | Number electrodes                                                                                          | EEG reference                                          | Number participants                                                                             | Experience                                                                                                                                                                                                                                                                                                                                                                      | Design                                                                                                                                                                                                                                                                                          | Method                                                                         | Result                                                                                                                                                                                                                                                                                                                                                                                                                                                                                                                                                                                                                                                                                                                                                                                                                                                                                                                                                                                                                              |
|---------------------------------------------------------------------------------------------------|---------------------------------------------------------------------------------------------------------------------------------------------|------|-------------------------------------------------|-----------------------------------|-------------------------------------------------------------|------------------------------------------------------------------------------------------------------------|--------------------------------------------------------|-------------------------------------------------------------------------------------------------|---------------------------------------------------------------------------------------------------------------------------------------------------------------------------------------------------------------------------------------------------------------------------------------------------------------------------------------------------------------------------------|-------------------------------------------------------------------------------------------------------------------------------------------------------------------------------------------------------------------------------------------------------------------------------------------------|--------------------------------------------------------------------------------|-------------------------------------------------------------------------------------------------------------------------------------------------------------------------------------------------------------------------------------------------------------------------------------------------------------------------------------------------------------------------------------------------------------------------------------------------------------------------------------------------------------------------------------------------------------------------------------------------------------------------------------------------------------------------------------------------------------------------------------------------------------------------------------------------------------------------------------------------------------------------------------------------------------------------------------------------------------------------------------------------------------------------------------|
| Wong KF, Teng J, Chee MWL, Doshi K, Lim J                                                         | Positive Effects of Mindfulness-Based Training on Energy Maintenance and the EEG Correlates of Sustained Attention in a Cohort of Nurses    | 2018 | Mindfulness                                     | CDM                               | Eyes open during activity and eyes closed during meditation | 64                                                                                                         | FCz                                                    | 36 nurses (2 males)                                                                             | No previous experience                                                                                                                                                                                                                                                                                                                                                          | Participants took a 8-week mindfulness based training (MBT) and data were acquired before and after the intervention.                                                                                                                                                                           | ERP (Visual)                                                                   | <p>P300 and alpha ERD</p> <p>Alpha power significantly decreases during meditation after intervention correlated with MBT attendance.</p> <p>Small decrease in P300 over time in post intervention. ERD in alpha was significantly negatively correlated with the number of MBT sessions attended. Reduced alpha power synchronizaton with more sessions of MBT</p>                                                                                                                                                                                                                                                                                                                                                                                                                                                                                                                                                                                                                                                                 |
| Kakumanu RJ, Nair AK, Venugopal R, Sasidharan A, Ghosh PK, John JP, Mehrotra S, Panth R, Kutty BM | Dissociating meditation proficiency and experience dependent EEG changes during traditional Vipassana meditation practice                   | 2018 | Vipassana (Anapana + Vipassana + Mettabhavan a) | CDM + ADM                         | Eye closed                                                  | 128                                                                                                        | average                                                | Novice: 24 (12 males)<br>Senior: 22 (11 males)<br>Teachers: 21 (11 males)                       | Novice: 2-3 ten-day courses with less than 3 years of practice; (average 2.2years)<br>Senior: at least one long retreat (20-90 days - only allowed after several 10 days retreats), with more than 7 years of daily practice (average: 13.0 years)<br>Teachers: Instructor of Vipassana with daily practice of more than 7 years and several long retreats (average 16.3 years) | Pre-Rest Eyes Open (RO) and Eyes Closed (RC)<br>Anapana (Ana); Vipassana (Vipa); Metta<br>Post-Rest (RO and RC)                                                                                                                                                                                 | Spectral (FFT)<br>Non-linear (Permutation Entropy, Higuch's Fractal dimension) | <p>Seniors and Teachers (vs Novices) showed trait increases in delta (1–4 Hz), theta-alpha (6–10 Hz) and low-gamma power (30–40 Hz) at baseline rest; state-trait increases in low-alpha (8–10 Hz) and low-gamma power during concentrative and mindfulness meditation; and theta-alpha and low-gamma power during loving-kindness meditation.</p> <p>Post-hoc analyses showed no differences between senior and teachers group in any bands and meditation types. However the novice group showed lower low-alpha and increased low-gamma when compared to the other groups</p> <p>Median power spectra and hours of meditation were positively correlated with theta-alpha and negatively correlated with delta, beta and gamma bands.</p> <p>Permutation entropy and Higuchi fractal dimension measures further dissociated high proficiency from duration of experience as only Teachers showed consistent increase in network complexity from baseline rest and state transitions between the different meditation states.</p> |
| Barnes LJ, McArthur GM, Biedermann BA, de Lissa P, Polito V, Badcock NA                           | No meditation-related changes in the auditory N1 during first-time meditation                                                               | 2018 | Breath counting meditation                      | CDM - FA                          | NA                                                          | (FP1, FP2, Fz, FCz, Cz, CPz, Pz, Oz, O1, O2, AFz (GND)) + EOG                                              | online reference to mastoid (M1), re-referenced to M2. | Experiment 1 - 8 participants<br>Experiment 2 - 12 participants<br>Experiment 3- 8 participants | No previous experience                                                                                                                                                                                                                                                                                                                                                          | Measurements done after one first-time meditation.<br>Experiment 1 - breath counting meditation and vizualization control condition                                                                                                                                                             | ERP (Auditory)                                                                 | <p>N100</p> <p>Refute previous studies that found N100 in first-time meditators smaller during meditation than non-meditation condition.</p> <p>Found the same result on experiments 1 and 2 but differ in 3. Found that the first result was due to the order of the conditions.</p> <p>N100 reduction on the firsts studies could be a result of repeated exposure to stimuli.</p>                                                                                                                                                                                                                                                                                                                                                                                                                                                                                                                                                                                                                                                |
| Ghaderi AH, Moradkhani S, Haghighatfard A, Akrami F, Khayyer Z, Balci F                           | Time estimation and beta segregation: An EEG study and graph theoretical approach                                                           | 2018 | Mindfulness - body scan                         | CDM-FA                            | Eyes open                                                   | 19                                                                                                         | Linked-ear                                             | Experiment 1 (exploratory): 42 (25 males)<br>Experiment 2 (confirmatory): 17 (10 males)         | NA                                                                                                                                                                                                                                                                                                                                                                              | Study of time perception during meditation.                                                                                                                                                                                                                                                     | Spectral (FFT) Network (Coherence)                                             | <p>Evaluation in delta and beta</p> <p>FFT: No differences between two groups during rest state (control) condition</p> <p>Graph: In the exploratory experiment, there was a difference in overestimator (OE) and underestimator (UE) groups in clustering coefficient in the beta sub-bands. In the beta2 and beta3 sub-bands, the UE group exhibited a higher clustering coefficient than the OE group. No significant difference was observed between the two groups in the beta1, high beta and delta bands. In the confirmatory experiment, striking differences of clustering coefficient were observed at the beta3 band respective to low thresholds.</p>                                                                                                                                                                                                                                                                                                                                                                   |
| Shaw L, Routray A                                                                                 | Topographical assessment of neurocortical connectivity by using directed transfer function and partial directed coherence during meditation | 2018 | Kriya Yoga Meditation                           | CDM                               | NA                                                          | 64 - 8 used for analysis<br>F4, Fz, F3—frontal lobe, C3, C4—central lobe, and P3, P4 and Pz—parietal lobe, | Earlobes                                               | 23 (17 males)                                                                                   | 9.66 ± 15.31                                                                                                                                                                                                                                                                                                                                                                    | Recordings only during meditation                                                                                                                                                                                                                                                               | Coherence (DTF, Partial directed coherence PDC)                                | PDC-based connectivity gives a better understanding of the non-symmetric relation in EEG obtained during Kriya Yoga meditation in comparison to DTF.                                                                                                                                                                                                                                                                                                                                                                                                                                                                                                                                                                                                                                                                                                                                                                                                                                                                                |
| Harme BP, Hiwale AS                                                                               | EEG Spectral Analysis on OM Mantra Meditation: A Pilot Study.                                                                               | 2018 | OM chanting                                     | CDM-FA                            | Eyes closed                                                 | 16                                                                                                         | right earlobe                                          | 23 (9 males)                                                                                    | No experience                                                                                                                                                                                                                                                                                                                                                                   | 2 min baseline recording (laying down with eyes closed)<br>30 min OM chanting (no eeg recording)<br>2 min post-chanting recording (laying down with eyes closed)                                                                                                                                | Spectral (FFT)                                                                 | No specific band involved into the OM chanting effect.                                                                                                                                                                                                                                                                                                                                                                                                                                                                                                                                                                                                                                                                                                                                                                                                                                                                                                                                                                              |
| Travis F, Valosek L, Konrad A 4th, Link J, Salerno J, Scheller R, Nidich S                        | Effect of meditation on psychological distress and brain functioning: A randomized controlled study                                         | 2018 | TM                                              | NDM                               | Eyes open                                                   | NA                                                                                                         | Left and right earlobe                                 | 31 TM group<br>36 Control Group                                                                 | No experience                                                                                                                                                                                                                                                                                                                                                                   | Randomized clinical trial<br>4 instruction sessions; individual guidance once a month and weekly meetings.<br>EEG recordings pre and 4 months posttest.<br>Recording in 2 reaction time tasks (1 simple and one choice)<br>Coherence and Power where calculated on choice task (more demandant) | ERP (CNV) Coherence Spectral (FFT)                                             | <p>Broadband fronta (F3-F4) Coherence</p> <p>CNV difference (CNV/simple-CNV/choice)</p> <p>Frontal, central and parietal alpha relative power (Alpha power/Total power).</p> <p>Frontal coherence, frontal, central and parietal relative alpha power, and the frontal and central simple/choice difference scores were converted to z-scores, compared to the normative database and summed to yield a single value for each person tested (Brain Integration Scale)</p> <p>Increase in Brain Integration Scale</p>                                                                                                                                                                                                                                                                                                                                                                                                                                                                                                                |

| Autors                                                                                                                                                                                             | Title                                                                                                                                                                                         | Year | Meditation                                    | Meditation category (ADM,NDM,CDM) | Eyes open or closed? | Number electrodes | EEG reference                                                                        | Number participants                                                                                                                          | Experience                                                                                            | Design                                                                                                                                                                                                                                                               | Method                                                   | Result                                                                                                                                                                                                                                                                                                                                                                                                                                                                                                                                                                                                                                                                                                                                                                                                                                                                                                                                                            |
|----------------------------------------------------------------------------------------------------------------------------------------------------------------------------------------------------|-----------------------------------------------------------------------------------------------------------------------------------------------------------------------------------------------|------|-----------------------------------------------|-----------------------------------|----------------------|-------------------|--------------------------------------------------------------------------------------|----------------------------------------------------------------------------------------------------------------------------------------------|-------------------------------------------------------------------------------------------------------|----------------------------------------------------------------------------------------------------------------------------------------------------------------------------------------------------------------------------------------------------------------------|----------------------------------------------------------|-------------------------------------------------------------------------------------------------------------------------------------------------------------------------------------------------------------------------------------------------------------------------------------------------------------------------------------------------------------------------------------------------------------------------------------------------------------------------------------------------------------------------------------------------------------------------------------------------------------------------------------------------------------------------------------------------------------------------------------------------------------------------------------------------------------------------------------------------------------------------------------------------------------------------------------------------------------------|
| Fucci E, Abdoun O, Caclin A, Francis A, Dunne JD, Ricard M, Davidson RJ, Lutz A                                                                                                                    | Differential effects of non-dual and focused attention meditations on the formation of automatic perceptual habits in expert practitioners                                                    | 2018 | Open Presence (OP) and Focused Attention (FA) | CDM-FA<br>NDM                     | Eyes open            | 128               | Vertex                                                                               | 16 Long Term practitioners (12 males)<br>15 control                                                                                          | > 10000h<br>Average: 28990<br><br>Controls 1 week (30 min per day)                                    | Oddball in three conditions (3 runs):<br>Open Presence<br>Focused Attention<br>Reading<br>RE1-OP1-FA1, FA2-OP2-RE2, OP3-FA3-RE3                                                                                                                                      | Spectral<br>ERP (Auditory)                               | <p>Increase in alpha for both groups during meditation, between practices, OP has the most powerful alpha activity in frontal ROI.</p> <p>Increase in frontal gamma oscillatory power during PO meditation states in expert practitioners only when compared to RE. And significant increase in gamma oscillatory power in experts, compared to novices, during OP and FA, but not RE.</p> <p>We did not find a relationship between spontaneous gamma activity and hours of meditation practice in expert practitioners.</p> <p>ERP:Mismatch Negativity (MMN) and the Late Frontal Negativity (LFN) We found a significant correlation between MMN and LFN amplitude and the frontal gamma activity in experts, but not novices and this correlation was marginally different between the two group.</p> <p>Using a linear mixed model the authors showed that novices and experts modulates the amplitude of MMN differently in different meditative states</p> |
| Dentico D, Bachhuber D, Riedner BA, Ferrarelli F, Tononi G, Davidson RJ, Lutz A                                                                                                                    | Acute effects of meditation training on the waking and sleeping brain: Is it all about homeostasis?                                                                                           | 2018 | Theravada and/or Tibetan Buddhist tradition   | CDM-FA/OM<br>ADM                  | Eyes open and closed | 256               | mastoid                                                                              | 29 Long term practitioners(14 males)<br>24 control (12 males)                                                                                | >3 years and<br>>3 one week retreat<br>Average 15.6 years<br><br>Control: no experience               | resting waking and whole night sleep<br>hd-EEG<br>At baseline;<br>After a full day of Vipassana practice ;<br>After a full day of Metta (LK) practice                                                                                                                | Spectral (FFT)                                           | <p>LTM exhibited an increased power compared to baseline session over midline prefrontal and left centro-parietal electrodes in several frequency bands ranging from delta to low-gamma, with the higher spatial extent in the theta range.</p> <p>This pattern was not present in controls</p>                                                                                                                                                                                                                                                                                                                                                                                                                                                                                                                                                                                                                                                                   |
| Hunter MA, Lieberman G, Coffman BA, Trumbo MC, Armenta ML, Robinson CSH, Bezdek MA, O'Sickey AJ, Jones AP, Romero V, Elkin-Frankston S, Gaurino S, Eusebi L, Schumacher EH, Witkiewitz K, Clark VP | Mindfulness-based training with transcranial direct current stimulation modulates neuronal resource allocation in working memory: A randomized pilot study with a nonequivalent control group | 2018 | Guided Mindfulness Meditation                 | CDM-FA/OM                         | NA                   | 128               | NA                                                                                   | 16 Meditation Group<br>13 Control group (reading + sham IDCS)                                                                                | NA<br>Excluded participants with more than 1 hour per week of cognitive training (including MBT)      | Training of 4 weeks of meditation and IDCS<br>n-back at Baseline vs post test                                                                                                                                                                                        | Multimodal (IDCS)<br>ERP (Visual)<br>Spectral (Wavelets) | <p>P300 amplitude increased in Meditators group in comparison with control group at post-training in frontal sites and decreased at frontal electrodes.</p> <p>P300 theta power: eMBT group was increased compared to the Control group and to eMBT baseline when collapsing across WM load conditions for Pz (mid line). And eMBT group has a decreased Fz theta power in 3-back after training when compared to control.</p>                                                                                                                                                                                                                                                                                                                                                                                                                                                                                                                                    |
| Van der Lubbe RHJ, De Kleine E, Schreurs KMG, Bohlmeijer ET                                                                                                                                        | Does mindfulness training modulate the influence of spatial attention on the processing of intracutaneous electrical stimuli?                                                                 | 2018 | Mindfulness (MBSR)                            | CDM-FA                            | eyes open            | 61 + EOG          | NA                                                                                   | 28:<br>15 in the pre-post group (immediately before and after MBSR)<br>13 in the post-post2 group (immediately after MBSR and 8 weeks after) | No previous experience (8 weeks intervention)                                                         | Go/NoGo with visual and electrical Stimulus                                                                                                                                                                                                                          | ERP (Visual/Electrical stimulus)                         | <p>Alpha power was clearly lateralized due to spatial attention and several ERP components (N130, N180, P340) were modulated by spatial attention, as expected in this experimental setup but no support was found for an influence of the MBSR training and no significant effects or interaction with Individual Training Time.</p> <p>Analyses revealed that individual differences in training time modulated some of the observed effects, but no support was found for an influence on attentional orienting.</p>                                                                                                                                                                                                                                                                                                                                                                                                                                           |
| Schöne B, Gruber T, Graetz S, Bernhof M, Malinowski P                                                                                                                                              | Mindful breath awareness meditation facilitates efficiency gains in brain networks: A steady-state visually evoked potentials study                                                           | 2018 | Mindful breath awareness meditation           | CDM -FA/OM                        | eyes open            | 128               | Two additional electrodes were used as reference and ground electrodes, CMS and DRL. | 17 in meditation group<br>17 in progressive muscle relaxation                                                                                | naive                                                                                                 | participants were randomly assigned to 8 weeks of meditation or progressive muscle relaxation. Experiment compared both groups (pre-post intervention) during multiple object tracking with electrophysiological recording of steady-state visual evoked potentials. | EP (Visual)                                              | <p>reduced SSVEP-amplitudes (500 ms to 6800 ms) after movement onset and in the three time windows: T1 (500-2000 ms), T2 (2000 –4750 ms) and T3 (4750 –6800 ms) in meditation group after the training compared to progressive muscle relaxation.</p>                                                                                                                                                                                                                                                                                                                                                                                                                                                                                                                                                                                                                                                                                                             |
| Lee D, Kang DH, Ha NH, Oh CY, Lee U, Kang SW                                                                                                                                                       | Effects of an Online Mind-Body Training Program on the Default Mode Network: An EEG Functional Connectivity Study                                                                             | 2018 | Mind-Body Training                            | CDM- FA/OM                        | Eyes closed          | 19                | common average                                                                       | 14 in intervention<br>15 in waiting list control group<br>all females                                                                        | Intervention group participated online in 8 minute sections, once a day, 5 days a week during 4 weeks | Recordings on resting state                                                                                                                                                                                                                                          | Source (beamforming)<br>Network (Imaginary Coherence)    | <p>global DMN network strengths in the theta and alpha frequency bands in meditators and not in controls</p>                                                                                                                                                                                                                                                                                                                                                                                                                                                                                                                                                                                                                                                                                                                                                                                                                                                      |
| Luft CDB, Zioga I, Banissy MJ, Bhattacharya J                                                                                                                                                      | Spontaneous Visual Imagery During Meditation for Creating Visual Art: An EEG and Brain Stimulation Case Study                                                                                 | 2019 | stabilizing and analytical meditation         | CDM                               | Eyes closer          | 64                | NA                                                                                   | 1                                                                                                                                            | 10 years                                                                                              | baseline eyes open and closed<br>10 meditation sessions in 5 non consecutive days<br>IACS applied in alpha, gamma and sham version in 3 days                                                                                                                         | Multimodal (IACS)<br>Spectral (FFT)                      | <p>Gamma increase in analytic meditation at frontal and occipital sites. Alpha IACS related with sharper, shorter and increase number of visions during meditation</p>                                                                                                                                                                                                                                                                                                                                                                                                                                                                                                                                                                                                                                                                                                                                                                                            |
| Telles S, Singh D, Naveen KV, Palloor S, Singh N, Pathak S                                                                                                                                         | P300 and Heart Rate Variability Recorded Simultaneously in Meditation                                                                                                                         | 2019 | meditative focusing and defocused meditation  | CDM- FA/OM                        | eyes open            | 1 (Cz)            | linked earlobes                                                                      | 47 (all males)                                                                                                                               | > 24 months + 3 months intervention                                                                   | <p>4 interventions (20 min) in random order and different days:<br/>1) nonmeditative focused thinking<br/>2)Random thinking<br/>3) Meditative focusing<br/>4) Defocused meditation</p> <p>Oddball task (5 min) before and after intervention</p>                     | ERP (Auditory)                                           | <p>There was an increase in the P300 peak amplitude after meditative focusing, defocused meditation and a decrease after random thinking. P300 peak latency reduction after defocused meditation.</p>                                                                                                                                                                                                                                                                                                                                                                                                                                                                                                                                                                                                                                                                                                                                                             |

| Autors                                                                                                                             | Title                                                                                                                                  | Year | Meditation                          | Meditation category (ADM,NDM,CDM) | Eyes open or closed? | Number electrodes | EEG reference      | Number participants                                                    | Experience                                                       | Design                                                                                                                                                                                                                                                                                                          | Method                                                                                  | Result                                                                                                                                                                                                                                                                                                                                                                                                                                                                                                                                                                                                                                                                                                                                                                                                                                                                                                                                                                                                                                     |
|------------------------------------------------------------------------------------------------------------------------------------|----------------------------------------------------------------------------------------------------------------------------------------|------|-------------------------------------|-----------------------------------|----------------------|-------------------|--------------------|------------------------------------------------------------------------|------------------------------------------------------------------|-----------------------------------------------------------------------------------------------------------------------------------------------------------------------------------------------------------------------------------------------------------------------------------------------------------------|-----------------------------------------------------------------------------------------|--------------------------------------------------------------------------------------------------------------------------------------------------------------------------------------------------------------------------------------------------------------------------------------------------------------------------------------------------------------------------------------------------------------------------------------------------------------------------------------------------------------------------------------------------------------------------------------------------------------------------------------------------------------------------------------------------------------------------------------------------------------------------------------------------------------------------------------------------------------------------------------------------------------------------------------------------------------------------------------------------------------------------------------------|
| Isbel BD, Lagopoulos J, Hermens DF, Summers MJ                                                                                     | Mental training affects electrophysiological markers of attention resource allocation in healthy older adults                          | 2019 | Mindfulness Meditation              | CDM-FA                            | NA                   | 9                 | average mastoid    | 41 meditation group (45% males)<br>28 active control group (25% males) | No experience (8 weeks intervention)                             | Oddball                                                                                                                                                                                                                                                                                                         | ERP (Auditory)                                                                          | Decreased N2 amplitudes at frontal and central regions during an auditory oddball task after training in both groups.<br>Only mindfulness group showed reductions in frontal N2 and P3 latency.                                                                                                                                                                                                                                                                                                                                                                                                                                                                                                                                                                                                                                                                                                                                                                                                                                            |
| Miyashiro D, Toyomura A, Haitani T, Kumano H                                                                                       | Altered auditory feedback perception following an 8-week mindfulness meditation practice                                               | 2019 | Mindfulness Meditation              | CDM-FA/OM                         | NA                   | 64                | Left earlobe       | 15 Meditation Group (4 males)<br>15 Control (6 males)                  | No experience (8 weeks intervention)                             | Vocalization task - vocalize /a/ approximately 100 times, with 200ms delay feedback (~2min)<br>Listening task - participants listening their voices (~2min)<br><br>2 Recordings session (pre and post intervention). In each session there are 2 blocks separated by 16 min of meditation or listening to news. | ERP (Auditory)                                                                          | In the vocalization task there was a N1 increase amplitude after meditation session in post-intervention session.<br>In the listening task, no difference was found.                                                                                                                                                                                                                                                                                                                                                                                                                                                                                                                                                                                                                                                                                                                                                                                                                                                                       |
| Pozuelos JP, Mead BR, Rueda MR, Malinowski P.                                                                                      | Short-term mindful breath awareness training improves inhibitory control and response monitoring                                       | 2019 | mindful breath awareness meditation | CDM-FA                            | NA                   | 64                | NA                 | 21 Meditation Group (10 males)<br>15 Waitlist control group (9 males)  | No experience (3 week intervention)                              | Go/NoGo                                                                                                                                                                                                                                                                                                         | ERP (Visual)                                                                            | Meditation training enhanced the N2 event-related potential in No-Go trials and the error-related negativity (ERN) after error responses. The changes in the ERN were correlated with the accumulated amount of meditation time. No group difference in P300.                                                                                                                                                                                                                                                                                                                                                                                                                                                                                                                                                                                                                                                                                                                                                                              |
| Kakumanu RJ, Nair AK, Sasidharan A, John JP, Mehrotra S, Panth R, Kutty BM                                                         | State-trait influences of Vipassana meditation practice on P3 EEG dynamics                                                             | 2019 | Vipassana                           | CDM                               | Eyes open            | 128               | NA                 | 22 novices (11 males)<br>21 Senior (10 males)<br>16 teachers (8 males) | Averages:<br>Novices: 989h<br>Senior: 10520h<br>Teachers: 14648h | Gamified multilevel oddball                                                                                                                                                                                                                                                                                     | ERP (Visual)<br>Spectral (of ERP)<br>Coherence                                          | Novices were very different from the long-term groups showing significant differences in the scalp measures of spectrum, ERSP and ITC at the theta-alpha and gamma1 bands.<br><br>Nov processed rare and frequent stimuli differently for ERSP in the theta2 band as well as in gamma1 power while the other two groups did not.<br><br>Novices and Teachers have differences for all the measures (ERP, spectra, ERSP and ITC) at Pz, differences only in spectra between Novices and Senior and no differences between Senior and Teacher.<br><br>Scalp plots for spectra, ERSP and ITC also showed a wider range of changes between Novices and Teachers (encompassing theta-alpha, beta1 and gamma1 bands) whereas there were no differences between Novices and Senior for ITC, and primarily during alpha bands for spectral measures. Senior and Teacher were different in terms of alpha1 synchrony for frequent stimuli.                                                                                                          |
| Lasaponara S, Glicksohn J, Mauro F, Ben-Soussan TD                                                                                 | Contingent negative variation and P3 modulations following mindful movement training                                                   | 2019 | Quadrato Motor Training             | -                                 | Eyes open            | 64                | Cz                 | 23 (8 males)                                                           | No experience                                                    | Simple Response Time (SRT)<br>Choice Response Time (CRT)<br><br>Tasks performed before and after 7 min meditation session                                                                                                                                                                                       | ERP (Visual)                                                                            | Increased CNV for SRT and decreased for CRT after meditation practice<br>No P3 amplitude difference for SRT and increased dor CRT after meditation practice                                                                                                                                                                                                                                                                                                                                                                                                                                                                                                                                                                                                                                                                                                                                                                                                                                                                                |
| Sharma H, Raj R, Juneja M                                                                                                          | EEG signal based classification before and after combined Yoga and Sudarshan Kriya                                                     | 2019 | Sudarshan Kriya (SK)                | CDM-FA                            | Eye closed           | 32                | NA                 | 50, all males<br>25 - Control Group<br>25 - Intervention Group         | Naive                                                            | 3 months of Yoga and SK meditation (1h/Day)<br>10 min (lying down)                                                                                                                                                                                                                                              | Spectral (Wavelets - Daubechie)<br>Classification (Artificial Neuronal Network)         | 87.2% of accuracy in distinguishing meditators and non-meditators.                                                                                                                                                                                                                                                                                                                                                                                                                                                                                                                                                                                                                                                                                                                                                                                                                                                                                                                                                                         |
| Bailey NW, Freedman G, Raj K, Sullivan CM, Rogasch NC, Chung SW, Hoy KE, Chambers R, Hassed C, Van Dam NT, Koenig T, Fitzgerald PB | Mindfulness meditators show altered distributions of early and late neural activity markers of attention in a response inhibition task | 2019 | Mindfulness Based                   | CDM - FA                          | Eyes open            | 64                | Between Cz and CPz | 34 Meditators (13 males)<br>28 control group (11 males)                | 2 years or more (except for 3 meditators)                        | Go/NoGo (emotional faces)                                                                                                                                                                                                                                                                                       | ERP (Visual)<br>Source (sLORETA)<br>Global Field Potential (RAGU)<br>Microstates (RAGU) | P300/ P100<br>Controls has different amplitudes for P300 in Go than in No-Go trials, while meditators showed no differences.<br>P300 was more frontally distributed in meditators than in controls<br>Pre-C1 topography were different between groups (differences in anticipatory activity)<br>P300 has more fronto-central positivity in both Go and No-Go trials (altered attentional function)<br>N2 presented no differences (thought to reflect inhibition and conflict monitoring)<br>Microstates: Microstate related to pre-C1 (microstate 2) began earlier in meditators compared to controls. Microstates (5 and 6), reflecting P300, show that meditators spend more of the P300 period in frontally dominant topographies compared to controls.<br>Loreta: Similar distributions of activity between groups in both the per-C1 and P300 periods. Difference maps showed that meditators has more pre-C1 activity in right temporal and parietal regions, and P300 activity widespread in central frontal and parietal regions. |
| Zhang W, Ouyang Y, Tang F, Chen J, Li H                                                                                            | Breath-focused mindfulness alters early and late components during emotion regulation                                                  | 2019 | Breath-focused mindfulness          | CDM - FA                          | Eyes open            | 64                | Left-mastoid       | 20 (11 males)                                                          | naive                                                            | Participants listen recording of BFM for three minutes before experimental procedure.<br><br>Participants performed 60 blocks of task. Each block has 3 images (negavite, neutral and positive valence) x 2 task (View or Focus).                                                                               | ERP (Visual)                                                                            | BFM attenuated P1, N2, and LPP amplitudes for positive and negative pictures but not for neutral pictures. P1 amplitudes for emotional minus neutral pictures correlated with individual differences in focus attention measured by the Attentional Control Scale, while N2 amplitudes for emotional minus neutral pictures correlated with individual differences in trait mindfulness measured by the MAAS.                                                                                                                                                                                                                                                                                                                                                                                                                                                                                                                                                                                                                              |
| Nyhus E, Engel WA, Pitfield TD, Vakkur IMW                                                                                         | Increases in Theta Oscillatory Activity During Episodic Memory Retrieval Following Mindfulness Meditation Training                     | 2019 | mindfulness meditation              | CDM-FA                            | NA                   | 64                | NA                 | 20 meditation group (10 males)<br>20 wait list group (7 males)         | No experience (4 weeks intervention)                             | Episodic Memory Task<br>Pre and Post intervention                                                                                                                                                                                                                                                               | Spectral (Wavelets- Morlet)                                                             | Theta power (baseline corrected, 800ms before stimulus) was greater post training than pre-training in right frontal and left parietal channels for the meditation group and changes in FFMQ scores correlated with changes in theta oscillations in right frontal channels                                                                                                                                                                                                                                                                                                                                                                                                                                                                                                                                                                                                                                                                                                                                                                |

| Autors                                                                                                                        | Title                                                                                                                                                           | Year | Meditation                                                                                                                                    | Meditation category (ADM,NDM,CDM) | Eyes open or closed? | Number electrodes | EEG reference                           | Number participants                                                                                                               | Experience                                                                                                                                                                                                                                                      | Design                                                                                                                                                                                                                                                                                                                                                                     | Method                                                       | Result                                                                                                                                                                                                                                                                                                                                                                                                                                                                                                                                                                                                                                                                                                                                                                                                                                                                                                                                                                                                                                                                                                                                                                                                                                                                                                                                                                                                                                                |
|-------------------------------------------------------------------------------------------------------------------------------|-----------------------------------------------------------------------------------------------------------------------------------------------------------------|------|-----------------------------------------------------------------------------------------------------------------------------------------------|-----------------------------------|----------------------|-------------------|-----------------------------------------|-----------------------------------------------------------------------------------------------------------------------------------|-----------------------------------------------------------------------------------------------------------------------------------------------------------------------------------------------------------------------------------------------------------------|----------------------------------------------------------------------------------------------------------------------------------------------------------------------------------------------------------------------------------------------------------------------------------------------------------------------------------------------------------------------------|--------------------------------------------------------------|-------------------------------------------------------------------------------------------------------------------------------------------------------------------------------------------------------------------------------------------------------------------------------------------------------------------------------------------------------------------------------------------------------------------------------------------------------------------------------------------------------------------------------------------------------------------------------------------------------------------------------------------------------------------------------------------------------------------------------------------------------------------------------------------------------------------------------------------------------------------------------------------------------------------------------------------------------------------------------------------------------------------------------------------------------------------------------------------------------------------------------------------------------------------------------------------------------------------------------------------------------------------------------------------------------------------------------------------------------------------------------------------------------------------------------------------------------|
| Andreu CI, Palacios I, Moënné-Loccoz C, López V, Franken IHA, Cosmelli D, Slagter HA                                          | Enhanced response inhibition and reduced midfrontal theta activity in experienced Vipassana meditators                                                          | 2019 | Vipassana                                                                                                                                     | CDM                               | NA                   | 32                | NA                                      | 24 meditators<br>20 non-meditators                                                                                                | At least 1 year, 3 times a week, 1h each time. Average 5.1 years                                                                                                                                                                                                | Go/NoGo Emotional pictures                                                                                                                                                                                                                                                                                                                                                 | ERP (Visual)<br>Spectral (Multitaper)                        | ERP:<br>No changes in ERP indices of response inhibition, as indexed by the amplitude of the N2 and P3 components.<br><br>Spectral:<br>Decrease in midfrontal theta activity in Nogo vs. Go trials in the meditators compared to controls.                                                                                                                                                                                                                                                                                                                                                                                                                                                                                                                                                                                                                                                                                                                                                                                                                                                                                                                                                                                                                                                                                                                                                                                                            |
| Kormmeier J, Friedel E, Hecker L, Schmidt S, Wittmann M                                                                       | What happens in the brain of meditators when perception changes but not the stimulus?                                                                           | 2019 | meditation types with a dominant orientation toward awareness of the present moment (mindfulness meditation, Vipassana meditation, Soto Zen). | CDM-OM                            | Eyes open            | 32                | Average of TP9 and TP10                 | 12 experienced meditators (3 males)<br>15 controls (5 males)                                                                      | at least 3 years of continuous practice and had practiced at least 2 h per week over the last 8 weeks.                                                                                                                                                          | Similar to Go/NoGo but with ambiguous figures (Necker). Participants indicated if perception changed or remained.<br><br>They measured passive viewing and another condition where participant tried to hold perception for as long as possible                                                                                                                            | ERP (Visual)<br>Source (MSP)                                 | Source:<br>Contrast of reversal and stability trials<br><br>Frontal Negativity (around 160ms after stimulus onset) present only in Meditators show increased activity in middle/posterior cingulate cortex and left supplementary motor area. In more frontal sites, right medial prefrontal cortex showed increased reversal-related activity.                                                                                                                                                                                                                                                                                                                                                                                                                                                                                                                                                                                                                                                                                                                                                                                                                                                                                                                                                                                                                                                                                                       |
| Baquadano C, Lopez V, Cosmelli D, Lutz A                                                                                      | Electrophysiological evidence of the differential modulation of approach-related processes toward attractive foods by immersive or mindful viewing conditions   | 2019 | NA                                                                                                                                            | NA                                | NA                   | 64                | NA                                      | 25 (12 males) no meditators<br>25 (5 males) meditators                                                                            | 6 months - 6 years (average 1415 hours of practice)                                                                                                                                                                                                             | Approach Avoidance Task (120 food images)<br>Conditions Mindful or Immersed                                                                                                                                                                                                                                                                                                | ERP (Visual)                                                 | The P3 amplitude at Pz was greater for the mindful then for the immersed condition. As main effect, P300 amplitude was greater for approach than for the avoidance responses.<br><br>LPP1 at the parieto-occipital ROI (PO7, PO3, PO8, and PO4), where greater for approach than avoidance responses. The non-meditator group has greater amplitude for approach than for avoidance. For mediator group, LPP1 amplitudes for approach and avoidance were not different.<br><br>LPP2 at parietal ROI (P1, Pz, P2), for the control group, the LPP2 amplitude for approach responses was greater than for avoidance responses. For the mediator group, the LPP2 amplitude for approach responses was not greater than for avoidance responses. In summary individuals with more expertise in mindfulness meditation engaged in less late affective reappraisal during mindfulness than during immersion, as measured by lower amplitude in the late positive potential (LPP).<br><br>The approach bias toward attractive food was correlated with N2 amplitude, a marker of response inhibition, and the regulation of this bias by the mindful instruction compared to the immersed instruction was associated with a modulation of the visual N1 amplitude, a marker of early selective attention. In mindful condition at occipital ROI (O1, Oz, and O2), food type <u>by response interaction, with greater N1 amplitude for avoidance then for</u> |
| Savostyanov A, Tamozhnikov S, Bocharov A, Saprygin A, Matushkin Y, Lashin S, Kolpakova G, Sudobin K, Knyazev G                | The Effect of Meditation on Comprehension of Statements About One-Self and Others: A Pilot ERP and Behavioral Study                                             | 2019 | Shamata                                                                                                                                       | CDM-FA                            | Eyes open            | 130               | Cz                                      | 17 control (10 males)<br>18 short-term (11 males)<br>18 long term (11 males)                                                      | short-term: 3-5 years<br>long-term:10-30 years                                                                                                                                                                                                                  | Serial reaction time task (SRTT) with sentences with half of them with grammatically wrong sentences. There where 5 hidden groups of sentences:<br>1) describing aggression of a participant<br>2) describing sentences of other people<br>3) describing anxiety of a participant<br>4) describing anxiety in other people<br>5) neutral sentences about inanimate objects | ERP (Visual)                                                 | Higher amplitude of P300 peak in frontal and left temporal scalp regions for long-term meditators in comparison with both intermediate and control groups. The latency of P300 and P600 in left frontal and temporal regions positively correlated with TPT, whereas the amplitude of P300 in these regions had a negative correlation with TPT .                                                                                                                                                                                                                                                                                                                                                                                                                                                                                                                                                                                                                                                                                                                                                                                                                                                                                                                                                                                                                                                                                                     |
| JR Payne, O Baell, H Geddes, B Fitzgibbon, M Emonson, AT Hill, NT Van Dam, G Humble, PB Fitzgerald, NW Bailey                 | Experienced meditators exhibit no differences to demographically-matched controls in theta phase synchronisation, P200, or P300 during an auditory oddball task | 2020 | mindfulness                                                                                                                                   | CDM-FA/OM                         | Eyes open            | 64                | reference positioned between CPz and Cz | 22 - meditators<br>22 - controls                                                                                                  | Meditators - mean of 9.09 years of experience and 6.35 hours of current practice per week<br><br>Controls - less than 2 hours of meditation experience in a lifetime                                                                                            | -Go/NoGo task<br>-Dichotic listening<br>oddball task (Lutz et. al 2009)                                                                                                                                                                                                                                                                                                    | ERP (Auditory)<br>Coherence (inter-trial coherence in Theta) | No difference between meditators and controls were found on the theta phase synchronization, P200 or P300 using Topography Consistency Tests                                                                                                                                                                                                                                                                                                                                                                                                                                                                                                                                                                                                                                                                                                                                                                                                                                                                                                                                                                                                                                                                                                                                                                                                                                                                                                          |
| Anthony P. Zanesco, Brandon G. King, Chivon Powers, Rosanna De Meo, Kezia Wineberg, Katherine A. MacLean, & Clifford D. Saron | Modulation of Event-related Potentials of Visual Discrimination by Meditation Training and Sustained Attention                                                  | 2019 | shamata and metta                                                                                                                             | CDM                               | Eyes Open            | 88                | average referenced                      | 60 experienced meditators.<br>30 did a first meditation retreat<br>30 stayed in a waiting list and did the retreat after 3 months | The participatns had experience:<br>-number of prior meditation retreats- mean = 14,<br>-minutes of daily meditation practice - mean = 55<br>-estimate hours of lifetime experience mean = 2,610 total hours<br><br>Both groups underwent in a 3-months retreat | continuous performance task (CPT) at the beginning, middle an end at the meditation intervention                                                                                                                                                                                                                                                                           | ERP (Visual)                                                 | -CARTOOL for calculating GFP<br>-RAGU for Topographic ANOVA<br><br>On retreat 1 the difficulty of the task was calibrated to match the participants' current discrimination threshold (they increased their ability) and no changes in ERP were observed.<br><br>On retreat 2 the difficulty of the task was calibrated only at pre retreat test and kept constant for mid and post retreat tests and changes on N1 (faster and greater GFP amplitude) and P300 GFP amplitude increased for hits. The decline of GFP amplitude within was attenuated on Retreat 2.                                                                                                                                                                                                                                                                                                                                                                                                                                                                                                                                                                                                                                                                                                                                                                                                                                                                                    |

| Autors                                                                                              | Title                                                                                                                                      | Year | Meditation                                                  | Meditation category (ADM,NDM,CDM) | Eyes open or closed? | Number electrodes | EEG reference  | Number participants                                                                                                        | Experience                                                               | Design                                                                                                                                                                                                                                                   | Method                                                                                             | Result                                                                                                                                                                                                                                                                                                                                                                                                                                                                                                                                                                                                                                                                                                                                                                                                                                                        |
|-----------------------------------------------------------------------------------------------------|--------------------------------------------------------------------------------------------------------------------------------------------|------|-------------------------------------------------------------|-----------------------------------|----------------------|-------------------|----------------|----------------------------------------------------------------------------------------------------------------------------|--------------------------------------------------------------------------|----------------------------------------------------------------------------------------------------------------------------------------------------------------------------------------------------------------------------------------------------------|----------------------------------------------------------------------------------------------------|---------------------------------------------------------------------------------------------------------------------------------------------------------------------------------------------------------------------------------------------------------------------------------------------------------------------------------------------------------------------------------------------------------------------------------------------------------------------------------------------------------------------------------------------------------------------------------------------------------------------------------------------------------------------------------------------------------------------------------------------------------------------------------------------------------------------------------------------------------------|
| Eichel K, Stahl J                                                                                   | Error processing and mindfulness meditation in female students                                                                             | 2020 | Focused attention meditation, open monitoring and body scan | CDM-FA/OM                         | NA                   | 61                | left mastoid   | 42 (42 females)<br>22 meditation group<br>20 Progressive Muscle Relaxation                                                 | No experience (4 weeks intervention)                                     | 5 min baseline<br>50 min modified Simon task and an error detection paradigm (error-related negativity and error positivity). (11 blocks in total)                                                                                                       | ERP (Visual)                                                                                       | No difference on error negativity or error-related negativity (Ne/ERN) and error positivity (Pe) when comparing meditation and progressive muscle relaxation groups                                                                                                                                                                                                                                                                                                                                                                                                                                                                                                                                                                                                                                                                                           |
| Jiang H, He B, Guo X, Wang X, Guo M, Wang Z, Xue T, Li H, Xu T, Ye S, Suma D, Tong S, Cui D         | Brain-Heart Interactions Underlying Traditional Tibetan Buddhist Meditation                                                                | 2020 | Samatha and Vipassana                                       | CDM-FA/OM                         | Eyes closed          | 63                | Common average | 60 Tibetan Buddhist monks<br>25 male volunteers<br>all males                                                               | at least 2 h a day for 5–35 years (18.15 ± 8.25 years).                  | baseline vs meditation                                                                                                                                                                                                                                   | Source (DICS, LCMV)<br>Network (Imaginary Coherence, Cross Frequency Directionality)<br>Multimodal | meditation vs resting (state)<br>a cluster encompassing the ACC bilaterally and extending through the superior medial frontal gyrus.<br>decreased mean connectivity in the gamma band in the frontal-limbic network<br><br>meditators rest vs controls rest (trait):<br>2 separate clusters containing multiple regions: one extending across the PCC and precuneus bilaterally and another in the right mPFC<br>decreased parietal-central and parietal-limbic network connectivity in the theta band<br><br>Interaction between theta and gamma<br>Power of gamma oscillations resets the phase of theta oscillations during meditation. After averaging the CFD in the theta and gamma frequency ranges, we found that the gamma to theta CFD was significantly different between monk meditation and monk rest but not between monk rest and control rest |
| Katyal S, Hajcak G, Flora T, Bartlett A, Goldin P                                                   | Event-related potential and behavioural differences in affective self-referential processing in long-term meditators versus controls       | 2020 | Ananda Marga                                                | NDM                               | Eyes open            | 32                | NA             | 13 (9 males)<br>Meditation Group<br>15 (9 males) Control Group                                                             | More than 10 years; Average 32.2 years                                   | self-referential encoding task (SRET)                                                                                                                                                                                                                    | ERP (Visual)                                                                                       | early-Late Positive Potential was higher in controls for unpleasant vs no difference in meditators.                                                                                                                                                                                                                                                                                                                                                                                                                                                                                                                                                                                                                                                                                                                                                           |
| Chan RW, Alday PM, Zou-Williams L, Lushington K, Schlesewsky M, Bornkessel-Schlesewsky I, Immink MA | Focused-attention meditation increases cognitive control during motor sequence performance: Evidence from the N2 cortical evoked potential | 2020 | Yoga Nidra                                                  | CDM-FA                            | Eyes closed          | 64                | NA             | 29 (11 males):<br>12 (21 meditation sessions Group)<br>9 (1 meditation session Group)<br>8 (no meditation Control group)   | No previous experience                                                   | 21 days of Guided Meditation (21 FA Meditation group)<br>19 days of Listening Audio non-meditation related + Listening guided meditation before second test (1 FA meditation group)<br>19 days of Listening Audio non-meditation related (Control Group) | ERP(Visual)                                                                                        | N2 ERP on a Serial Reaction Time Task (SRTT)<br>The group with 21 sessions demonstrated a more pronounced N2 (that is closely related to cognitive control process and its ability to predict behavioral measures) over majority of anterior and central regions of interests during SRTT compared to the other groups.                                                                                                                                                                                                                                                                                                                                                                                                                                                                                                                                       |
| Vivot RM, Pallavicini C, Zamberlan F, Vigo D, Tagliazucchi E                                        | Meditation Increases the Entropy of Brain Oscillatory Activity                                                                             | 2020 | Vipassana, Himalayan Yoga and Isha Shoonya                  | CDM-FA/OM                         | Eyes closed          | 64                | right mastoid  | 16 (Vipassana) (11 males)<br>16 (Himalayan Yoga) (14 males)<br>16 (Isha Shoonya Yoga) (14 males)<br>16 Controls (14 males) | Averages (in hours)<br>Himalayan: 15457<br>Isha: 2625<br>Vipassana: 9201 | Instructed Mind Wandering (20 min)<br><br>Meditation (each meditator practiced its own method and controls were asked to pay attention to their breath) (20 min)<br><br>For both only the last 10 min were analysed                                      | Non-linear (sample Entropy)<br>Coherence Classification (Random Forest)                            | Vipassana resulted in the highest entropy increases, predominantly in the alpha and low/high gamma bands.<br>All meditation traditions increased the global coherence in the gamma band, but also stabilized gamma-range dynamics by lowering the metastability.<br><br>Machine learning classifiers could successfully generalize between certain pairs of meditation traditions based on the scalp distribution of gamma band entropies.                                                                                                                                                                                                                                                                                                                                                                                                                    |
| Yoshida K, Takeda K, Kasai T, Makinae S, Murakami Y, Hasegawa A, Sakai S.                           | Focused attention meditation training modifies neural activity and attention: longitudinal EEG data in non-meditators                      | 2020 | Focused Attention Meditation                                | CDM-FA                            | Closed eyes          | 20                | Nose tip       | 17 meditation group (7 males)<br>20 control group (10 males)                                                               | Naive (8 week program)                                                   | 8 week meditation training vs 8 week relaxation training three-stimulus oddball (2 runs of 4min)                                                                                                                                                         | ERP (Auditory)<br>Synchrony (Phase Synchrony Index - Morlet Wavelet)<br>Spectral (FFT)             | P300: Higher amplitude during oddball task and shorter reaction time in meditators group than in control at post training.<br>PSI: negative correlation between F4-Oz theta PSI during meditation and P300 amplitude during oddball task. Positive correlation between F4-Pz theta PSI during meditation and P300 amplitude during oddball task. Both in meditators but not control group.                                                                                                                                                                                                                                                                                                                                                                                                                                                                    |
